# Supplementary material for: Evaluation of RNAi and CRISPR technologies by large-scale gene expression profiling in the Connectivity Map
Source: PLoS Biol. 2017 Nov 30;15(11):e2003213. doi: 10.1371/journal.pbio.2003213 (PMC5726721; doi:10.1371/journal.pbio.2003213)
Supplement: S5 Data — Please see ReadMe tab in the file for a description. (XLSX) [file pbio.2003213.s009.xlsx]

## Sheet: BadSeeds
seed_seq_6mer	seedcnt	meancorr	stdcorr	p	fstat	q
AAACAG	9	0.115076	0.055608	0.00680245	0.183712	0.0481815
AAACAT	8	0.0257996	0.0559393	0.0115996	0.185908	0.0582306
AAACCA	7	0.267928	0.133121	0.611337	1.05283	0.704309
AAACCG	1	0.0606443	0	1	NaN	1
AAACCT	9	0.14607	0.0600118	0.0113921	0.213962	0.0577651
AAACGG	1	0.0812398	0	1	NaN	1
AAACGT	8	0.164173	0.0749811	0.0612226	0.334017	0.130405
AAACTA	9	0.108046	0.102061	0.237187	0.618847	0.325206
AAACTC	9	0.134864	0.0831069	0.0846266	0.410335	0.156143
AAACTG	9	0.082562	0.0672704	0.0239701	0.268851	0.0788004
AAAGAA	9	0.272512	0.107991	0.301708	0.692846	0.390133
AAAGAC	1	-0.0438055	0	1	NaN	1
AAAGAT	1	-0.0299848	0	1	NaN	1
AAAGCA	9	0.316668	0.0735711	0.0417483	0.321572	0.104701
AAAGCC	1	0.155821	0	1	NaN	1
AAAGCG	8	0.153582	0.0598473	0.0173339	0.212791	0.0689671
AAAGGA	1	0.0559494	0	1	NaN	1
AAAGGG	9	0.127265	0.0777007	0.0577318	0.358686	0.125949
AAAGGT	8	0.1095	0.0939041	0.182796	0.523882	0.267587
AAAGTA	1	0.137443	0	1	NaN	1
AAAGTC	7	0.260247	0.034151	0.00128221	0.0692899	0.0275167
AAAGTG	9	0.187583	0.0766976	0.0535029	0.349484	0.120339
AAAGTT	2	0.19484	0.154325	0.765751	1.41495	0.862084
AAATAC	9	0.110729	0.0505847	0.00352155	0.152021	0.0366114
AAATAT	9	0.0403147	0.0827049	0.0823798	0.406375	0.153872
AAATCC	9	0.247155	0.0751929	0.0475825	0.335907	0.112541
AAATGA	9	0.223338	0.078842	0.0628247	0.3693	0.132397
AAATGC	1	0.137561	0	1	NaN	1
AAATGG	7	0.0173846	0.0509551	0.0117235	0.154255	0.0582306
AAATTC	8	0.0768392	0.0525695	0.00795394	0.164185	0.0500712
AAATTG	8	0.0817617	0.0224348	2.94062e-05	0.0299026	0.00619295
AACAAA	8	0.106308	0.101729	0.255815	0.614833	0.343909
AACAAC	9	0.159412	0.049243	0.00291187	0.144064	0.0340223
AACAAG	9	0.23881	0.0706629	0.0326264	0.296652	0.0921886
AACAAT	9	0.165639	0.0719662	0.036509	0.307696	0.0981548
AACACA	9	0.250036	0.0921837	0.146417	0.504861	0.226842
AACACC	9	0.24599	0.101089	0.227262	0.607119	0.314051
AACACG	9	0.32685	0.118846	0.432107	0.839135	0.525011
AACAGA	9	0.301546	0.0855423	0.099115	0.434737	0.174919
AACAGC	9	0.314508	0.189151	0.969901	2.12559	1
AACAGG	1	-0.20716	0	1	NaN	1
AACAGT	9	0.161739	0.0474039	0.00221982	0.133503	0.0318266
AACATC	9	0.190063	0.0569608	0.00801563	0.19276	0.0501413
AACATG	1	0.0974968	0	1	NaN	1
AACATT	9	0.25687	0.0727188	0.0389013	0.314165	0.101814
AACCAA	9	0.455924	0.0928847	0.152076	0.51257	0.232643
AACCAC	1	0.049042	0	1	NaN	1
AACCAG	9	0.20392	0.0757847	0.0498515	0.341214	0.115033
AACCAT	9	0.339718	0.114253	0.375631	0.77553	0.465889
AACCCA	9	0.265908	0.0811745	0.0741959	0.391475	0.145023
AACCCT	9	0.226263	0.0676265	0.0247858	0.271705	0.0798806
AACCGG	9	0.0552288	0.0568226	0.00788424	0.191825	0.0499639
AACCGT	8	0.144262	0.0758915	0.0652317	0.342176	0.135165
AACCTC	9	0.0746776	0.0392198	0.000556527	0.0913849	0.0244637
AACCTG	9	0.130478	0.0885392	0.119042	0.465732	0.196168
AACCTT	9	0.207027	0.066199	0.0216393	0.260356	0.0758696
AACGAC	9	0.110742	0.0658988	0.0210185	0.257999	0.0751101
AACGAG	9	0.210151	0.0543294	0.00579648	0.175362	0.0439114
AACGAT	9	0.147911	0.0839932	0.0897241	0.419134	0.16266
AACGCA	9	0.10724	0.0499647	0.00322794	0.148317	0.0353088
AACGCT	9	0.243511	0.0803077	0.069817	0.383159	0.140211
AACGGA	9	0.260914	0.101223	0.228619	0.608731	0.315375
AACGTC	9	0.250704	0.0797451	0.067072	0.377809	0.137139
AACGTG	9	0.14417	0.0433141	0.00115602	0.111461	0.0271448
AACGTT	9	0.116951	0.0703045	0.031615	0.293651	0.0903995
AACTAA	7	0.118589	0.06179	0.0318153	0.22683	0.090708
AACTAC	9	0.195609	0.131547	0.588128	1.02808	0.681547
AACTAT	3	0.0992146	0.0793393	0.312001	0.373974	0.400981
AACTCA	9	0.262086	0.0968952	0.186821	0.557787	0.271591
AACTCC	9	0.277453	0.0729727	0.0397341	0.316363	0.102549
AACTCG	8	-0.0257834	0.0659887	0.0304453	0.258704	0.0883166
AACTCT	9	0.246651	0.0773281	0.0561343	0.355254	0.123919
AACTGA	9	0.260109	0.0676261	0.0247849	0.271702	0.0798806
AACTGC	9	0.212466	0.0752098	0.0476462	0.336058	0.112576
AACTGG	9	0.152085	0.0619637	0.0140856	0.228108	0.0638562
AACTGT	9	0.30342	0.0781999	0.0599222	0.36331	0.128772
AACTTC	9	0.258027	0.0434701	0.00118673	0.112265	0.0271448
AACTTG	9	0.240305	0.0441694	0.00133297	0.115907	0.0275167
AACTTT	9	0.097334	0.0428915	0.00107612	0.109297	0.0271448
AAGAAA	9	0.241934	0.0594728	0.0107254	0.210136	0.0566386
AAGAAC	9	0.285492	0.0554407	0.00666335	0.182609	0.0475173
AAGAAG	9	0.213523	0.0525109	0.0045766	0.163819	0.0408447
AAGAAT	9	0.0906293	0.0710556	0.0337621	0.299959	0.0938282
AAGACA	9	0.418545	0.0643301	0.0179949	0.245862	0.0699211
AAGACC	9	0.207131	0.0976594	0.193887	0.566621	0.279366
AAGACG	9	0.191342	0.0652871	0.0197963	0.253232	0.0729178
AAGACT	9	0.240186	0.0582658	0.00934479	0.201693	0.0529916
AAGAGA	9	0.205692	0.0904945	0.133301	0.486529	0.212033
AAGAGC	9	0.183392	0.0762506	0.0516919	0.345423	0.117761
AAGAGG	9	0.172221	0.0616616	0.0136388	0.225888	0.0626101
AAGAGT	9	0.216778	0.0566552	0.0077275	0.190697	0.049767
AAGATA	8	0.194138	0.0350974	0.000599933	0.0731835	0.0244637
AAGATC	9	0.228492	0.0696901	0.029936	0.28854	0.0882275
AAGATG	9	0.247867	0.0459818	0.00178347	0.125614	0.0291917
AAGATT	8	0.214858	0.102779	0.266463	0.627592	0.354573
AAGCAA	9	0.233256	0.127521	0.539581	0.966111	0.634601
AAGCAC	9	0.197098	0.0672712	0.0239719	0.268858	0.0788004
AAGCAG	9	0.226447	0.0651129	0.0194584	0.251883	0.0722317
AAGCAT	9	0.238279	0.063715	0.0169062	0.241184	0.068247
AAGCCA	9	0.353212	0.0537578	0.00538755	0.171691	0.0425513
AAGCCG	1	0.169292	0	1	NaN	1
AAGCCT	9	0.267153	0.0649166	0.019083	0.250366	0.0716804
AAGCGC	8	0.107889	0.124443	0.510596	0.920035	0.605541
AAGCGG	9	0.153675	0.069396	0.0291567	0.28611	0.0868105
AAGCGT	2	0.120508	0.181233	0.837547	1.95136	0.938231
AAGCTA	9	0.272902	0.0565583	0.00763782	0.190045	0.0497081
AAGCTC	7	0.282431	0.0991917	0.256999	0.58454	0.344885
AAGCTG	9	0.169683	0.0446741	0.0014476	0.11857	0.0275167
AAGCTT	8	0.104692	0.0628841	0.0231244	0.234934	0.0777924
AAGGAA	9	0.273785	0.0571244	0.00817341	0.193869	0.0507265
AAGGAC	9	0.296778	0.144762	0.732105	1.24501	0.828338
AAGGAG	9	0.224783	0.0793531	0.0652048	0.374104	0.135165
AAGGAT	9	0.323313	0.060469	0.011983	0.217235	0.0586393
AAGGCA	9	0.221906	0.0882843	0.117256	0.463054	0.194238
AAGGCC	1	-0.0420037	0	1	NaN	1
AAGGCG	2	0.27995	0.0645263	0.381059	0.247365	0.47151
AAGGCT	7	0.129961	0.103147	0.295275	0.63209	0.383069
AAGGGA	9	0.245837	0.0894111	0.125278	0.47495	0.203193
AAGGGC	1	0.0786584	0	1	NaN	1
AAGGGT	9	0.214394	0.0913255	0.139662	0.495505	0.218953
AAGGTC	9	0.175394	0.0582569	0.00933515	0.201632	0.0529916
AAGGTG	9	0.137498	0.0623664	0.0146988	0.231082	0.0643124
AAGGTT	9	0.220283	0.0928983	0.152187	0.51272	0.2327
AAGTAC	9	0.180566	0.0591865	0.0103842	0.208118	0.055851
AAGTCA	9	0.295063	0.104958	0.267911	0.654479	0.356049
AAGTCC	8	0.1038	0.0449243	0.00297909	0.119902	0.0343465
AAGTCT	9	0.229505	0.084996	0.0957332	0.429202	0.17057
AAGTGA	9	0.240642	0.127779	0.542739	0.970031	0.637365
AAGTGC	8	0.069353	0.0559356	0.011595	0.185884	0.0582306
AAGTGG	9	0.106781	0.0894677	0.125689	0.475551	0.203574
AAGTGT	9	0.266357	0.0774814	0.0567876	0.356664	0.125012
AAGTTA	9	0.178711	0.0610764	0.0128052	0.221621	0.0607383
AAGTTC	9	0.187403	0.0633889	0.0163502	0.238721	0.0678715
AAGTTG	9	0.176474	0.0747703	0.0460084	0.332141	0.110453
AAGTTT	9	0.122569	0.0453681	0.00161856	0.122283	0.0281761
AATAAG	7	0.000552926	0.0995763	0.26063	0.589083	0.348746
AATAAT	9	0.148383	0.0964699	0.182949	0.552902	0.267687
AATACA	1	0.19392	0	1	NaN	1
AATACC	9	0.163333	0.0908515	0.136012	0.490375	0.215182
AATACG	2	0.155314	0.0568783	0.338906	0.192202	0.427557
AATACT	1	0.0667924	0	1	NaN	1
AATAGA	9	0.109939	0.0964426	0.182701	0.552588	0.267572
AATAGT	9	0.120915	0.0527577	0.00472864	0.165362	0.0410379
AATATC	3	0.138753	0.0450522	0.113599	0.120586	0.190376
AATATT	9	0.212299	0.0843856	0.0920445	0.423059	0.165303
AATCAA	9	0.357914	0.13288	0.603831	1.04902	0.696932
AATCAC	9	0.255364	0.0540425	0.00558816	0.173514	0.043311
AATCAG	9	0.103361	0.0542955	0.00577152	0.175143	0.0439114
AATCAT	9	0.151832	0.0788148	0.0626998	0.369045	0.13231
AATCCA	9	0.323935	0.0872036	0.109874	0.451787	0.186255
AATCCT	8	0.119721	0.0713122	0.0467994	0.302128	0.111746
AATCGA	8	0.193193	0.0440669	0.00263494	0.115369	0.0331895
AATCGG	9	0.137493	0.0377254	0.000416773	0.0845537	0.0244637
AATCTC	7	0.188984	0.071396	0.0642735	0.302839	0.134108
AATCTG	1	0.0733006	0	1	NaN	1
AATCTT	9	0.12713	0.0672668	0.0239619	0.268822	0.0788004
AATGAA	9	0.245046	0.120935	0.458076	0.868897	0.551892
AATGAC	9	0.196918	0.0804834	0.0706897	0.384837	0.140978
AATGAG	9	0.102745	0.120734	0.455577	0.866013	0.54951
AATGAT	1	0.149941	0	1	NaN	1
AATGCC	9	0.3038	0.101721	0.233694	0.614734	0.321258
AATGCG	9	0.141692	0.0311776	9.87351e-05	0.0577498	0.0128448
AATGCT	9	0.189754	0.0829658	0.083833	0.408942	0.155536
AATGGA	9	0.147781	0.0443921	0.00138258	0.117078	0.0275167
AATGGC	9	0.172789	0.0691172	0.0284319	0.283815	0.0857289
AATGGG	8	0.296638	0.127541	0.546213	0.966416	0.640731
AATGGT	9	0.066461	0.0451776	0.00157004	0.121258	0.0280213
AATGTA	8	0.180075	0.102959	0.268303	0.629789	0.35638
AATGTC	9	0.284979	0.0901405	0.130646	0.48273	0.208838
AATGTG	9	0.24091	0.0640295	0.0174563	0.243571	0.0689671
AATTAA	7	0.107106	0.0465747	0.00722933	0.128874	0.0493186
AATTAT	9	0.173003	0.0433399	0.00116104	0.111594	0.0271448
AATTCA	9	0.109119	0.0931565	0.154303	0.515574	0.234687
AATTCC	9	0.16203	0.0517472	0.00413107	0.159088	0.0389554
AATTCT	8	0.114258	0.09252	0.171166	0.508552	0.2557
AATTGA	8	0.105944	0.0577371	0.0140173	0.19805	0.063713
AATTGC	7	0.0595972	0.05664	0.0204228	0.190595	0.0740864
AATTGG	9	0.200868	0.0615456	0.0134703	0.22504	0.0624856
AATTGT	1	0.0635522	0	1	NaN	1
AATTTA	7	0.0679784	0.0565535	0.0202621	0.190013	0.0739206
AATTTC	9	0.0755889	0.0730323	0.0399312	0.316879	0.102776
ACAAAC	8	0.211372	0.0941073	0.184538	0.526151	0.269263
ACAAAG	9	0.198408	0.075064	0.0470983	0.334756	0.111816
ACAAAT	9	0.297201	0.0875582	0.112262	0.455468	0.188736
ACAACA	9	0.456331	0.0839328	0.0893702	0.418531	0.162253
ACAACC	9	0.291757	0.0501214	0.00330017	0.149249	0.03546
ACAACG	8	0.125674	0.0736498	0.0556724	0.322261	0.123312
ACAACT	9	0.302067	0.0871309	0.109388	0.451034	0.185883
ACAAGA	9	0.413757	0.059134	0.0103225	0.207749	0.055851
ACAAGC	9	0.171017	0.0789714	0.0634215	0.370514	0.133001
ACAAGG	9	0.338174	0.0735513	0.0416805	0.321399	0.104665
ACAAGT	9	0.43287	0.0475309	0.00226277	0.13422	0.0318266
ACAATA	9	0.471465	0.0532024	0.00501302	0.168162	0.041674
ACAATC	9	0.339249	0.0754179	0.048436	0.337919	0.113593
ACAATG	9	0.19664	0.0421338	0.00094444	0.105469	0.0264694
ACAATT	9	0.244031	0.0766146	0.0531636	0.348729	0.120217
ACACAA	9	0.330691	0.0905432	0.133669	0.487053	0.212404
ACACAC	9	0.354695	0.100312	0.219466	0.597816	0.30555
ACACAG	9	0.362335	0.0779889	0.0589891	0.361351	0.127722
ACACCA	9	0.266354	0.095266	0.172225	0.539187	0.25639
ACACCC	2	0.319129	0.0330627	0.201152	0.0649441	0.286622
ACACCG	9	0.262418	0.0911505	0.138307	0.493608	0.217379
ACACCT	9	0.370447	0.0571414	0.00818995	0.193984	0.0507295
ACACGA	1	0.133398	0	1	NaN	1
ACACGC	8	0.271563	0.0779055	0.0747347	0.360579	0.145511
ACACGG	9	0.226096	0.0809626	0.0731084	0.389433	0.144163
ACACGT	9	0.350528	0.0981392	0.198395	0.572202	0.283948
ACACTC	9	0.120873	0.0584337	0.00952784	0.202857	0.0533606
ACACTG	9	0.364292	0.0928633	0.151901	0.512333	0.232488
ACACTT	9	0.432749	0.0735236	0.0415858	0.321158	0.104665
ACAGAA	9	0.380161	0.0581372	0.00920651	0.200804	0.0529916
ACAGAC	9	0.400178	0.0730743	0.040071	0.317245	0.102776
ACAGAG	9	0.246973	0.0762292	0.0516064	0.345229	0.117761
ACAGAT	9	0.41842	0.0616784	0.0136633	0.226011	0.0626101
ACAGCA	9	0.542039	0.0822152	0.0796978	0.401577	0.150935
ACAGCC	9	0.220111	0.0516196	0.00406023	0.158304	0.0389554
ACAGCG	9	0.163894	0.0665597	0.0224037	0.263201	0.0770113
ACAGCT	9	0.347924	0.0518797	0.00420574	0.159904	0.0394241
ACAGGA	9	0.414375	0.0954447	0.173794	0.541212	0.257969
ACAGGC	9	0.223149	0.0844347	0.0923381	0.423552	0.165736
ACAGGG	9	0.1582	0.0308102	9.01873e-05	0.0563965	0.0128448
ACAGGT	9	0.241396	0.0390034	0.00053413	0.0903794	0.0244637
ACAGTA	8	0.164784	0.0363227	0.000752232	0.078383	0.0248238
ACAGTC	7	0.375553	0.0842716	0.135083	0.421917	0.214112
ACAGTG	9	0.218725	0.0563684	0.00746464	0.188771	0.049647
ACAGTT	9	0.164229	0.0648459	0.0189492	0.249821	0.0715174
ACATAA	1	0.0996003	0	1	NaN	1
ACATAC	8	0.378735	0.0445587	0.0028281	0.117958	0.0338408
ACATAG	9	0.181529	0.0504606	0.00346111	0.151276	0.0366114
ACATAT	8	0.106248	0.0992517	0.231439	0.585249	0.31843
ACATCA	9	0.416612	0.0673026	0.024043	0.269109	0.0789519
ACATCC	9	0.333877	0.0626623	0.0151626	0.23328	0.0651683
ACATCG	9	0.154428	0.0781353	0.0596355	0.36271	0.128243
ACATCT	9	0.422585	0.0852893	0.0975389	0.432168	0.1734
ACATGA	9	0.374997	0.0748524	0.0463112	0.332871	0.110999
ACATGC	8	0.271064	0.0507829	0.00642882	0.153214	0.0469022
ACATGG	9	0.167535	0.0405179	0.000708245	0.0975345	0.0244637
ACATGT	7	0.139775	0.133301	0.613145	1.05568	0.705877
ACATTA	9	0.289622	0.0561865	0.00730174	0.187555	0.0493186
ACATTC	9	0.194351	0.0908173	0.13575	0.490006	0.214955
ACATTG	9	0.161544	0.0397174	0.000611066	0.0937186	0.0244637
ACATTT	9	0.310644	0.0789508	0.0633262	0.37032	0.133001
ACCAAA	9	0.296259	0.099587	0.212318	0.58921	0.297578
ACCAAC	9	0.281573	0.0682341	0.0262261	0.276609	0.0826403
ACCAAG	9	0.178027	0.0841945	0.0909095	0.421145	0.164105
ACCAAT	9	0.253176	0.0749512	0.0466773	0.33375	0.111589
ACCACA	9	0.209223	0.0881943	0.11663	0.46211	0.193404
ACCACC	9	0.231164	0.0731248	0.0402391	0.317683	0.102776
ACCACG	9	0.2252	0.0821083	0.0791201	0.400533	0.150459
ACCACT	9	0.277126	0.090469	0.133109	0.486254	0.212033
ACCAGA	9	0.365307	0.0911275	0.13813	0.493359	0.217351
ACCAGC	9	0.410603	0.0648578	0.0189717	0.249913	0.0715174
ACCAGG	9	0.267168	0.0712555	0.0343513	0.301648	0.0948564
ACCAGT	9	0.321139	0.03882	0.000515749	0.0895316	0.0244637
ACCATA	9	0.234065	0.117108	0.410596	0.814768	0.501787
ACCATC	9	0.185262	0.0959337	0.178129	0.546772	0.26258
ACCATG	1	0.0315211	0	1	NaN	1
ACCATT	9	0.240023	0.0866956	0.106507	0.446538	0.183355
ACCCAA	6	0.155379	0.108328	0.374473	0.697181	0.464635
ACCCAC	9	0.357871	0.0580961	0.00916267	0.200521	0.0529916
ACCCAG	9	0.283361	0.100356	0.219908	0.598347	0.306031
ACCCAT	9	0.281928	0.0871833	0.109737	0.451576	0.186176
ACCCGA	1	0.337472	0	1	NaN	1
ACCCGT	9	0.237313	0.0691373	0.0284836	0.283981	0.0857289
ACCCTA	9	0.298643	0.12937	0.562059	0.994334	0.655772
ACCCTC	9	0.342527	0.0616867	0.0136755	0.226073	0.0626101
ACCCTG	9	0.201093	0.0610457	0.0127625	0.221398	0.0607383
ACCCTT	9	0.21473	0.151852	0.795937	1.36995	0.895111
ACCGAA	9	0.254293	0.10796	0.301355	0.692448	0.389996
ACCGAG	9	0.244374	0.0722768	0.0374826	0.310357	0.0996697
ACCGAT	7	0.15114	0.074848	0.080032	0.332831	0.15139
ACCGCA	9	0.326768	0.106337	0.283081	0.671784	0.370291
ACCGCG	9	0.11461	0.063035	0.015763	0.236063	0.0664825
ACCGCT	9	0.313116	0.105741	0.276487	0.664282	0.36423
ACCGGA	9	0.312352	0.0812375	0.0745214	0.392083	0.145406
ACCGGC	1	0.0292822	0	1	NaN	1
ACCGGT	3	0.114867	0.114356	0.540175	0.776933	0.635062
ACCGTA	7	0.275598	0.0846213	0.137468	0.425425	0.216829
ACCGTG	9	0.256172	0.0887786	0.120734	0.468253	0.197836
ACCTAC	9	0.32906	0.0331351	0.000156935	0.0652289	0.0154925
ACCTAG	1	0.100753	0	1	NaN	1
ACCTAT	9	0.298713	0.101914	0.23567	0.617062	0.323406
ACCTCA	9	0.473386	0.170531	0.913407	1.72771	1
ACCTCC	9	0.16838	0.0932796	0.155318	0.516937	0.23555
ACCTCG	9	0.130836	0.0742964	0.0442888	0.327944	0.107881
ACCTCT	9	0.240566	0.0463573	0.00189108	0.127674	0.0294754
ACCTGA	9	0.448344	0.102531	0.242061	0.624563	0.329883
ACCTGC	9	0.278275	0.0485612	0.00263709	0.140101	0.0331895
ACCTGG	9	0.314709	0.0830383	0.0842403	0.409658	0.15586
ACCTGT	9	0.34069	0.10655	0.285456	0.674479	0.372834
ACCTTA	8	0.268035	0.076208	0.0666671	0.345037	0.136665
ACCTTC	9	0.446528	0.11284	0.358564	0.756468	0.448063
ACCTTG	9	0.219142	0.0611863	0.0129586	0.22242	0.0609587
ACCTTT	1	0.0946373	0	1	NaN	1
ACGAAA	1	0.0193262	0	1	NaN	1
ACGAAG	8	0.0451393	0.0568061	0.0127208	0.191714	0.0607383
ACGAAT	1	-0.00398687	0	1	NaN	1
ACGACA	9	0.415278	0.102634	0.243134	0.625817	0.330632
ACGACC	9	0.257061	0.0881829	0.11655	0.461991	0.193373
ACGACG	9	0.146035	0.0798492	0.0675743	0.378796	0.137988
ACGACT	9	0.282904	0.0608752	0.0125281	0.220164	0.0603298
ACGAGA	9	0.373597	0.0990058	0.206671	0.582351	0.292113
ACGAGC	9	0.233787	0.106223	0.28182	0.670351	0.3691
ACGAGG	9	0.163714	0.0691261	0.0284549	0.283889	0.0857289
ACGAGT	9	0.15127	0.0623454	0.0146662	0.230926	0.0643124
ACGATA	9	0.16385	0.0767304	0.0536377	0.349783	0.120428
ACGATG	9	0.158193	0.0677336	0.0250353	0.272567	0.0803724
ACGCAA	9	0.249444	0.0953095	0.172607	0.53968	0.256837
ACGCAG	8	0.14626	0.0808037	0.089982	0.387906	0.162989
ACGCAT	8	0.0677998	0.0811296	0.0918149	0.391041	0.164985
ACGCCA	9	0.31595	0.0883345	0.117607	0.463581	0.194411
ACGCCT	9	0.187501	0.0698526	0.0303734	0.289887	0.0882783
ACGCGT	8	0.246194	0.0651271	0.0282614	0.251993	0.0855152
ACGCTC	9	0.298224	0.0910435	0.137483	0.49245	0.216829
ACGCTG	8	0.140859	0.0551919	0.0106961	0.180973	0.0566284
ACGCTT	8	0.119939	0.0956928	0.198426	0.54403	0.283948
ACGGAA	8	0.305495	0.133843	0.616389	1.06428	0.709094
ACGGAC	9	0.23286	0.0904866	0.133241	0.486444	0.212033
ACGGAG	9	0.233077	0.0842188	0.0910534	0.421388	0.16427
ACGGAT	8	0.213652	0.0810502	0.091366	0.390276	0.164459
ACGGCA	9	0.247399	0.0870435	0.108805	0.450129	0.185434
ACGGCG	9	0.210011	0.0792545	0.0647408	0.373175	0.134816
ACGGCT	9	0.12238	0.0524916	0.00456485	0.163698	0.0408447
ACGGGA	9	0.359316	0.133461	0.610612	1.05821	0.703729
ACGGTA	1	0.113341	0	1	NaN	1
ACGGTC	9	0.173789	0.14484	0.732866	1.24636	0.828903
ACGGTG	9	0.212076	0.0758616	0.050152	0.341907	0.115642
ACGTAG	9	0.0758356	0.0626814	0.015193	0.233422	0.0651956
ACGTAT	9	0.149669	0.0681978	0.0261385	0.276316	0.0826403
ACGTCA	9	0.236429	0.0847025	0.0939478	0.426243	0.167958
ACGTGA	9	0.183231	0.079888	0.0677621	0.379164	0.138282
ACGTGC	9	0.20855	0.0860832	0.10254	0.440252	0.178963
ACGTGG	9	0.139031	0.0684673	0.0267957	0.278504	0.0833967
ACGTGT	9	0.243637	0.0793455	0.0651689	0.374032	0.135165
ACGTTC	8	0.208924	0.0426657	0.00214256	0.108149	0.0316278
ACGTTG	8	0.223094	0.057081	0.0130936	0.193574	0.0611327
ACTAAA	9	0.112206	0.0802892	0.0697252	0.382982	0.140116
ACTAAC	9	0.120803	0.0621198	0.0143209	0.229258	0.0639422
ACTAAG	8	0.0601346	0.06945	0.0404931	0.286556	0.102828
ACTACA	9	0.421435	0.0628253	0.015423	0.234495	0.065662
ACTACC	9	0.348562	0.0569818	0.00803576	0.192902	0.0501679
ACTACG	9	0.243757	0.11235	0.352686	0.749909	0.441767
ACTACT	9	0.318738	0.113732	0.369321	0.768479	0.458783
ACTAGA	9	0.264373	0.0709277	0.033389	0.298879	0.0937562
ACTAGC	8	0.0906438	0.045546	0.00325076	0.123244	0.0353088
ACTAGG	1	0.00588702	0	1	NaN	1
ACTAGT	8	0.125119	0.0771514	0.0710733	0.353632	0.141583
ACTATA	9	0.255841	0.120052	0.447098	0.856262	0.542181
ACTATC	9	0.176795	0.104041	0.258014	0.643098	0.345954
ACTATG	9	0.220989	0.0732282	0.040585	0.318582	0.102978
ACTCAA	9	0.351145	0.0799468	0.0680474	0.379723	0.138594
ACTCAC	9	0.183489	0.0690281	0.0282032	0.283084	0.0855028
ACTCAG	9	0.375934	0.0668076	0.0229409	0.265165	0.0774998
ACTCAT	8	0.191299	0.0860434	0.122404	0.439845	0.199626
ACTCCA	9	0.459262	0.0765611	0.0529453	0.348242	0.11981
ACTCCC	7	0.242911	0.111702	0.383671	0.741285	0.474184
ACTCCG	9	0.167096	0.102756	0.244404	0.627301	0.332074
ACTCCT	9	0.160364	0.0458246	0.00173996	0.124756	0.0287777
ACTCGG	9	0.218116	0.0968403	0.186319	0.557156	0.271111
ACTCGT	6	0.122077	0.0599573	0.0430956	0.213574	0.106561
ACTCTA	9	0.323353	0.0669729	0.0233044	0.266478	0.0779034
ACTCTC	9	0.303757	0.0857688	0.10054	0.437042	0.176644
ACTCTG	9	0.109076	0.0383926	0.000474971	0.087571	0.0244637
ACTCTT	9	0.186571	0.09169	0.142507	0.499468	0.222312
ACTGAA	9	0.410129	0.139052	0.67342	1.14874	0.766607
ACTGAC	8	0.179228	0.134347	0.621818	1.07231	0.713521
ACTGAG	9	0.110463	0.0538576	0.00545723	0.172329	0.0428307
ACTGAT	6	0.206678	0.119363	0.483502	0.846452	0.577145
ACTGCA	9	0.415981	0.0981926	0.1989	0.572825	0.28431
ACTGCC	9	0.221362	0.0787552	0.0624267	0.368488	0.13191
ACTGCT	9	0.271172	0.0772196	0.0556749	0.354257	0.123312
ACTGGA	9	0.413782	0.10176	0.23409	0.615201	0.321657
ACTGGC	1	0.0640203	0	1	NaN	1
ACTGGG	9	0.0961722	0.023011	9.45244e-06	0.0314584	0.00460382
ACTGGT	9	0.31489	0.0735455	0.0416605	0.321348	0.104665
ACTGTA	9	0.478255	0.122854	0.481954	0.896695	0.576047
ACTGTC	9	0.312212	0.121767	0.468424	0.880887	0.562644
ACTGTG	9	0.231225	0.0567755	0.0078399	0.191508	0.0499319
ACTGTT	9	0.233559	0.0619662	0.0140892	0.228125	0.0638562
ACTTAA	1	0.00841409	0	1	NaN	1
ACTTAC	9	0.178325	0.0697894	0.0302029	0.289364	0.0882783
ACTTAG	9	0.0949028	0.0416179	0.000862763	0.102902	0.0254611
ACTTAT	8	0.160262	0.123185	0.496007	0.90153	0.590165
ACTTCA	9	0.434509	0.0674065	0.0242794	0.269941	0.0791885
ACTTCC	9	0.360908	0.0821155	0.0791589	0.400603	0.150459
ACTTCG	9	0.177709	0.0486925	0.00268826	0.14086	0.0332005
ACTTCT	9	0.255526	0.0752884	0.0479432	0.33676	0.112856
ACTTGA	9	0.115492	0.0606475	0.0122201	0.218519	0.0592984
ACTTGC	9	0.215805	0.0603924	0.0118823	0.216685	0.0584283
ACTTGG	9	0.361078	0.0710067	0.0336192	0.299546	0.0938282
ACTTGT	9	0.350449	0.0557295	0.00690498	0.184516	0.048473
ACTTTA	9	0.326923	0.0769812	0.0546754	0.352074	0.122063
ACTTTC	9	0.209385	0.0740451	0.0433959	0.325729	0.106766
ACTTTG	9	0.312458	0.0884518	0.118428	0.464813	0.195564
AGAAAC	9	0.253458	0.0829867	0.0839505	0.409149	0.155536
AGAAAG	9	0.294598	0.112091	0.34959	0.746453	0.43841
AGAAAT	9	0.214811	0.053258	0.00504949	0.168513	0.041867
AGAACA	9	0.271599	0.0637449	0.0169579	0.24141	0.068247
AGAACC	9	0.380424	0.0910597	0.137608	0.492626	0.216918
AGAACG	9	0.337854	0.115285	0.388205	0.789602	0.478852
AGAACT	9	0.321705	0.0575908	0.00863696	0.197048	0.052009
AGAAGA	9	0.438774	0.0482118	0.0025048	0.138093	0.032697
AGAAGC	9	0.29279	0.0563979	0.00749134	0.188969	0.049647
AGAAGG	9	0.278406	0.0462182	0.0018506	0.126908	0.0294754
AGAAGT	9	0.359346	0.0971236	0.188918	0.56042	0.273884
AGAATA	9	0.296658	0.105577	0.274682	0.662223	0.362522
AGAATC	9	0.210191	0.0987915	0.204609	0.579834	0.290271
AGAATG	1	0.184557	0	1	NaN	1
AGAATT	7	0.143871	0.111654	0.383164	0.740654	0.473744
AGACAA	9	0.369723	0.0878814	0.114468	0.458837	0.191214
AGACAC	9	0.371947	0.0829599	0.0838	0.408884	0.155536
AGACAG	9	0.247798	0.0570088	0.00806169	0.193085	0.0501978
AGACAT	9	0.287288	0.0596391	0.0109278	0.211313	0.0570394
AGACCA	8	0.268607	0.0750386	0.0614706	0.334529	0.130589
AGACCC	9	0.217362	0.05933	0.0105541	0.209128	0.0563185
AGACCG	9	0.209314	0.0698602	0.030394	0.289951	0.0882783
AGACCT	9	0.289742	0.0513538	0.00391586	0.156679	0.0384168
AGACGA	9	0.147324	0.0207271	4.17431e-06	0.0255236	0.00460382
AGACGC	9	0.159841	0.0581947	0.00926813	0.201202	0.0529916
AGACGG	9	0.19479	0.0624561	0.0148383	0.231747	0.06471
AGACGT	2	0.19368	0.171396	0.813517	1.74528	0.913579
AGACTA	9	0.315313	0.125935	0.520117	0.942236	0.614914
AGACTC	9	0.381895	0.0896933	0.127338	0.477952	0.205501
AGACTG	9	0.221337	0.0692967	0.028897	0.285292	0.0863628
AGACTT	9	0.281118	0.110114	0.326227	0.720356	0.414875
AGAGAA	9	0.227422	0.0660715	0.021374	0.259354	0.0755262
AGAGAC	9	0.234572	0.0430089	0.00109784	0.109896	0.0271448
AGAGAG	9	0.152569	0.0759884	0.0506504	0.343051	0.116198
AGAGAT	9	0.301633	0.0793249	0.0650715	0.373838	0.135149
AGAGCA	9	0.318044	0.0829949	0.0839963	0.40923	0.155536
AGAGCC	9	0.407511	0.10826	0.304786	0.696311	0.393309
AGAGCG	9	0.113462	0.0702459	0.0314518	0.293161	0.0903995
AGAGCT	9	0.415381	0.0958307	0.177211	0.545599	0.261961
AGAGGA	9	0.435984	0.080279	0.0696747	0.382885	0.140116
AGAGGC	9	0.354265	0.0373642	0.00038787	0.0829422	0.0244637
AGAGGG	9	0.130892	0.0684217	0.0266834	0.278132	0.0831291
AGAGGT	9	0.416647	0.0956195	0.175338	0.543197	0.259677
AGAGTA	9	0.3324	0.1059	0.278239	0.666278	0.365928
AGAGTC	9	0.49409	0.0617178	0.013721	0.2263	0.0626369
AGAGTG	9	0.176089	0.0820613	0.078867	0.400074	0.150175
AGAGTT	9	0.308976	0.0804584	0.0705652	0.384598	0.140969
AGATAA	9	0.258751	0.0810621	0.0736178	0.390391	0.144417
AGATAC	9	0.294951	0.0914585	0.140696	0.49695	0.220139
AGATAG	9	0.164583	0.0875116	0.111946	0.454983	0.188406
AGATAT	9	0.216629	0.0659685	0.0211614	0.258545	0.0752514
AGATCA	9	0.340401	0.0769714	0.0546346	0.351984	0.122059
AGATCC	9	0.152953	0.0896918	0.127327	0.477936	0.205501
AGATCG	9	0.0969464	0.0489337	0.00278444	0.142259	0.0336756
AGATCT	8	0.138915	0.115801	0.41006	0.796692	0.501787
AGATGA	9	0.38818	0.0665789	0.0224449	0.263352	0.0770689
AGATGC	9	0.356885	0.0549235	0.00624774	0.179218	0.0462216
AGATGG	9	0.307537	0.0784986	0.0612604	0.36609	0.130405
AGATGT	9	0.383293	0.0996351	0.212789	0.589779	0.297962
AGATTA	9	0.177054	0.0906091	0.134168	0.487762	0.212983
AGATTC	9	0.250236	0.082991	0.0839745	0.409191	0.155536
AGATTG	9	0.231042	0.0634644	0.0164777	0.23929	0.0681321
AGATTT	9	0.0573127	0.0697396	0.0300687	0.28895	0.0882783
AGCAAA	9	0.267449	0.0839013	0.0891865	0.418217	0.162151
AGCAAC	9	0.248991	0.116206	0.399493	0.802267	0.490668
AGCAAG	9	0.218641	0.0864852	0.105133	0.444373	0.181882
AGCAAT	9	0.188372	0.083413	0.0863646	0.413363	0.158435
AGCACA	9	0.333287	0.0761921	0.0514582	0.344893	0.117709
AGCACC	9	0.384217	0.0988606	0.205272	0.580645	0.290977
AGCACG	8	0.210719	0.0954157	0.195962	0.540884	0.281511
AGCACT	8	0.148128	0.0986581	0.225763	0.578269	0.312526
AGCAGA	9	0.37358	0.128635	0.553158	0.983068	0.647435
AGCAGC	9	0.405599	0.0987008	0.203739	0.57877	0.289653
AGCAGG	9	0.201886	0.0569112	0.00796828	0.192424	0.0500712
AGCAGT	9	0.307705	0.0831755	0.0850137	0.411012	0.156494
AGCATA	9	0.322863	0.0536476	0.00531152	0.170988	0.0425513
AGCATC	9	0.418751	0.0511285	0.00379676	0.155307	0.038285
AGCATG	8	0.0978913	0.0674545	0.0344449	0.270325	0.0949872
AGCATT	9	0.501355	0.0996237	0.212677	0.589644	0.297937
AGCCAA	9	0.51165	0.103128	0.248317	0.631861	0.336037
AGCCAC	9	0.319469	0.0392514	0.000559864	0.0915322	0.0244637
AGCCAG	9	0.380077	0.0924423	0.14849	0.507698	0.228931
AGCCAT	9	0.373863	0.0463751	0.0018963	0.127771	0.0294754
AGCCCA	9	0.402658	0.128035	0.54586	0.97392	0.640554
AGCCCT	9	0.247731	0.0647154	0.0187043	0.248817	0.0714273
AGCCGA	9	0.276739	0.0647368	0.0187443	0.248982	0.0714273
AGCCGC	9	0.107571	0.0487672	0.00271775	0.141293	0.0333977
AGCCTA	9	0.332923	0.0735045	0.0415205	0.320991	0.104596
AGCCTC	9	0.183416	0.102371	0.240399	0.622617	0.328246
AGCCTG	9	0.27345	0.155725	0.826291	1.44073	0.926997
AGCCTT	9	0.29845	0.133601	0.612237	1.06043	0.705088
AGCGAC	9	0.182698	0.0733688	0.0410592	0.319807	0.103762
AGCGAG	9	0.00673786	0.0687631	0.0275314	0.280915	0.084298
AGCGAT	9	0.198025	0.0907666	0.135364	0.489459	0.214451
AGCGCT	9	0.224649	0.112444	0.353819	0.751173	0.442835
AGCGGA	9	0.374486	0.0958526	0.177406	0.545848	0.262007
AGCGGC	9	0.0418082	0.0475443	0.00226732	0.134295	0.0318266
AGCGGG	1	0.071882	0	1	NaN	1
AGCGTG	9	0.183193	0.0846365	0.093549	0.425578	0.167434
AGCGTT	9	0.230722	0.0896045	0.126688	0.477007	0.204814
AGCTAA	1	0.00932276	0	1	NaN	1
AGCTAC	9	0.30852	0.113043	0.361003	0.75919	0.45022
AGCTAG	9	0.155052	0.0593717	0.0106039	0.209422	0.0564888
AGCTAT	9	0.292431	0.070438	0.0319889	0.294767	0.0907934
AGCTCA	9	0.368758	0.0530253	0.00489817	0.167044	0.0414784
AGCTCC	1	0.219326	0	1	NaN	1
AGCTCG	8	0.0998622	0.0195015	1.12481e-05	0.0225945	0.00460382
AGCTCT	9	0.311439	0.066024	0.0212758	0.258981	0.0752635
AGCTGA	9	0.358033	0.0742915	0.0442712	0.327901	0.107881
AGCTGC	9	0.177765	0.0547685	0.00612737	0.178208	0.0457597
AGCTGG	9	0.282849	0.0616615	0.0136386	0.225888	0.0626101
AGCTGT	9	0.3693	0.0398525	0.000626627	0.0943572	0.0244637
AGCTTA	8	0.193727	0.0693452	0.0401575	0.285691	0.102776
AGCTTC	1	0.250555	0	1	NaN	1
AGCTTT	9	0.150771	0.0316465	0.000110642	0.0594999	0.0134431
AGGAAA	9	0.30251	0.055457	0.00667679	0.182716	0.0475173
AGGAAC	9	0.288226	0.0395697	0.000594426	0.0930228	0.0244637
AGGAAG	9	0.28949	0.0778215	0.0582563	0.359802	0.126831
AGGAAT	9	0.259707	0.0742415	0.0440926	0.32746	0.107785
AGGACA	9	0.321898	0.0584586	0.00955521	0.20303	0.0533606
AGGACC	9	0.300847	0.0838042	0.0886204	0.41725	0.161449
AGGACG	9	0.326776	0.0888749	0.121419	0.469269	0.198634
AGGACT	9	0.300985	0.0753131	0.048037	0.336981	0.112992
AGGAGA	9	0.341946	0.0599036	0.0112557	0.213191	0.0573816
AGGAGC	9	0.311904	0.0935023	0.157165	0.519408	0.238007
AGGAGG	9	0.328226	0.083708	0.0880619	0.416292	0.160895
AGGAGT	9	0.38735	0.0875853	0.112446	0.45575	0.188946
AGGATA	1	0.205722	0	1	NaN	1
AGGATC	7	0.250719	0.079939	0.107558	0.379649	0.18426
AGGATG	9	0.234035	0.0241961	1.39772e-05	0.0347821	0.00486383
AGGCAA	9	0.345634	0.103838	0.255836	0.640582	0.343909
AGGCAC	9	0.33093	0.0780489	0.0592534	0.361908	0.1278
AGGCAG	1	0.0069424	0	1	NaN	1
AGGCAT	8	0.202886	0.0715952	0.047816	0.304531	0.11264
AGGCCA	9	0.184364	0.095893	0.177766	0.546309	0.26229
AGGCCC	9	0.0403002	0.0749569	0.0466987	0.333801	0.111589
AGGCCG	8	0.221645	0.0849899	0.115377	0.42914	0.191931
AGGCGG	3	-0.0013167	0.112041	0.525629	0.745789	0.62027
AGGCGT	1	0.0802739	0	1	NaN	1
AGGCTA	9	0.282789	0.0939439	0.160862	0.524326	0.24256
AGGCTC	9	0.0954435	0.0789772	0.0634481	0.370567	0.133001
AGGCTG	9	0.0615225	0.0565455	0.00762604	0.189959	0.0497081
AGGCTT	9	0.173017	0.0522147	0.00439936	0.161976	0.0403999
AGGGAA	8	0.185642	0.109227	0.335356	0.708806	0.423926
AGGGAC	9	0.110413	0.0983993	0.200861	0.57524	0.286557
AGGGAG	1	0.0546666	0	1	NaN	1
AGGGCA	7	0.315234	0.158958	0.826767	1.50117	0.927141
AGGGCT	9	0.102055	0.0664508	0.0221706	0.26234	0.0768793
AGGGTA	9	0.263979	0.0976648	0.193938	0.566683	0.279366
AGGGTC	8	0.188548	0.0472035	0.00407428	0.132377	0.0389554
AGGGTG	9	0.242542	0.0939605	0.161002	0.524511	0.242655
AGGGTT	9	0.303451	0.103396	0.25114	0.635142	0.339039
AGGTAA	9	0.218606	0.0928425	0.151731	0.512104	0.232341
AGGTAC	7	0.155227	0.0819851	0.120087	0.399332	0.197335
AGGTAG	7	0.181672	0.135968	0.639537	1.09834	0.729877
AGGTAT	9	0.159091	0.0570199	0.00807233	0.19316	0.0501978
AGGTCA	9	0.298881	0.0644636	0.0182383	0.246884	0.0706931
AGGTCC	8	-0.0021733	0.0612052	0.0197667	0.222557	0.0729178
AGGTCT	9	0.220219	0.0446907	0.0014515	0.118658	0.0275167
AGGTGA	9	0.324814	0.0712994	0.0344818	0.30202	0.0949872
AGGTGG	9	0.150367	0.0489624	0.00279606	0.142426	0.0336756
AGGTGT	9	0.349421	0.075459	0.0485931	0.338288	0.113792
AGGTTA	9	0.0945584	0.0683312	0.0264621	0.277397	0.0828994
AGGTTC	9	0.146854	0.0639537	0.0173225	0.242994	0.0689671
AGGTTG	9	0.13354	0.074887	0.0464392	0.333179	0.111137
AGGTTT	1	0.0890062	0	1	NaN	1
AGTAAA	9	0.219706	0.0989038	0.205688	0.581153	0.291116
AGTAAT	1	-0.00603886	0	1	NaN	1
AGTACA	9	0.410163	0.0710703	0.0338052	0.300083	0.0938407
AGTACC	2	0.0593381	0.0546668	0.326506	0.177546	0.415063
AGTACG	9	0.253846	0.0856234	0.0996233	0.435561	0.175509
AGTACT	8	0.212195	0.0598571	0.0173506	0.212861	0.0689671
AGTAGA	9	0.281567	0.0968119	0.186059	0.556829	0.270857
AGTAGC	9	0.169517	0.102148	0.238088	0.619906	0.325876
AGTAGG	1	0.163252	0	1	NaN	1
AGTAGT	9	0.302483	0.103019	0.247169	0.630526	0.334823
AGTATA	9	0.2976	0.131474	0.587263	1.02695	0.681044
AGTATC	9	0.427629	0.0893806	0.125056	0.474625	0.203007
AGTATG	9	0.492336	0.140742	0.691413	1.17683	0.784948
AGTATT	9	0.23253	0.107089	0.291499	0.681324	0.378949
AGTCAA	9	0.271084	0.0678964	0.025418	0.273878	0.0812861
AGTCAC	9	0.379115	0.13153	0.587928	1.02782	0.681547
AGTCAG	9	0.0918216	0.0369037	0.000353505	0.0809105	0.0244637
AGTCAT	8	0.161959	0.0587751	0.0155809	0.205235	0.0658382
AGTCCA	9	0.339534	0.127285	0.53669	0.962533	0.632207
AGTCCT	9	0.336118	0.0867657	0.106968	0.44726	0.183648
AGTCGA	9	0.265678	0.108852	0.311576	0.703941	0.400598
AGTCGG	9	0.284159	0.086742	0.106812	0.447016	0.18358
AGTCGT	7	0.108848	0.0817378	0.118528	0.396927	0.195627
AGTCTA	7	0.0710217	0.024597	0.000192828	0.0359443	0.0180206
AGTCTC	9	0.391051	0.069665	0.029869	0.288332	0.0882275
AGTCTG	9	0.118374	0.0495513	0.00304361	0.145873	0.0346917
AGTCTT	9	0.207479	0.0554405	0.0066632	0.182608	0.0475173
AGTGAA	9	0.296137	0.0733359	0.0409478	0.319519	0.103649
AGTGAC	9	0.248601	0.0702874	0.0315673	0.293508	0.0903995
AGTGAG	9	0.13623	0.0497997	0.00315332	0.147339	0.0349851
AGTGAT	9	0.259756	0.0994631	0.211107	0.587744	0.296658
AGTGCA	9	0.307317	0.104704	0.26515	0.651312	0.353421
AGTGCC	9	0.246235	0.0681515	0.0260267	0.27594	0.0826403
AGTGCT	9	0.153604	0.0505456	0.00350243	0.151786	0.0366114
AGTGGA	9	0.277968	0.03833	0.000469231	0.0872856	0.0244637
AGTGGC	8	0.328761	0.076753	0.0691892	0.34999	0.139639
AGTGGT	9	0.111619	0.0536895	0.00534031	0.171255	0.0425513
AGTGTA	1	0.227473	0	1	NaN	1
AGTGTC	8	0.317615	0.0843713	0.111371	0.422916	0.187838
AGTGTG	9	0.28708	0.0696573	0.0298483	0.288269	0.0882275
AGTGTT	2	0.152649	0.103453	0.574771	0.635839	0.668274
AGTTAC	8	0.165277	0.165375	0.876813	1.62481	0.979786
AGTTAG	8	0.0943674	0.0680436	0.0361564	0.275068	0.0977059
AGTTCA	9	0.154916	0.0957291	0.176308	0.544442	0.26087
AGTTCC	9	0.229713	0.116519	0.403344	0.806598	0.494437
AGTTCT	9	0.273953	0.0537572	0.00538715	0.171687	0.0425513
AGTTGA	9	0.308291	0.112393	0.353203	0.750485	0.442239
AGTTGC	9	0.24453	0.0742976	0.0442932	0.327955	0.107881
AGTTGG	9	0.115457	0.105959	0.278893	0.667022	0.366635
AGTTTA	9	0.256942	0.0756843	0.0494611	0.340311	0.114635
AGTTTC	9	0.169145	0.111356	0.340854	0.736702	0.429501
AGTTTG	9	0.180755	0.0688487	0.027747	0.281615	0.0846094
ATAAAC	7	0.0930034	0.0326306	0.000988852	0.0632579	0.0271448
ATAAAG	9	0.10099	0.0661573	0.0215522	0.260028	0.0757325
ATAACA	9	0.306828	0.134582	0.623567	1.07606	0.714721
ATAACC	9	0.159706	0.0616038	0.0135546	0.225465	0.0625404
ATAACT	9	0.212034	0.0702764	0.0315367	0.293416	0.0903995
ATAAGA	9	0.158646	0.0682867	0.0263539	0.277037	0.0827555
ATAAGC	9	0.203973	0.0413562	0.000823656	0.101612	0.0252615
ATAAGT	8	0.154868	0.107047	0.31145	0.680788	0.400598
ATAATA	1	0.151286	0	1	NaN	1
ATACAC	9	0.231826	0.0742926	0.0442751	0.32791	0.107881
ATACAT	9	0.290366	0.102978	0.246732	0.630016	0.334378
ATACCA	9	0.214141	0.0729665	0.0397137	0.316309	0.102549
ATACCC	9	0.252385	0.0711909	0.03416	0.301102	0.0944108
ATACCT	9	0.187603	0.0730732	0.0400674	0.317235	0.102776
ATACGA	9	0.14551	0.0674114	0.0242905	0.269979	0.0791885
ATACGC	1	0.141517	0	1	NaN	1
ATACGT	1	0.0188748	0	1	NaN	1
ATACTA	8	0.13944	0.0794101	0.0824155	0.374642	0.153872
ATACTG	9	0.160681	0.0783404	0.0605489	0.364616	0.12954
ATAGAA	9	0.308257	0.0530683	0.00492585	0.167315	0.0414784
ATAGAC	9	0.127823	0.0549887	0.00629893	0.179643	0.0462787
ATAGAG	9	0.134703	0.0567752	0.00783959	0.191506	0.0499319
ATAGCA	1	0.106693	0	1	NaN	1
ATAGCC	1	0.0638669	0	1	NaN	1
ATAGCT	3	0.11012	0.0259512	0.0392211	0.040011	0.102143
ATAGGA	9	0.250068	0.0969274	0.187116	0.558158	0.271894
ATAGGC	8	0.13745	0.0806746	0.0892625	0.386667	0.162151
ATAGTA	1	0.118408	0	1	NaN	1
ATAGTC	9	0.237844	0.101063	0.226998	0.606805	0.313823
ATAGTG	9	0.159971	0.0527218	0.00470627	0.165137	0.0409562
ATATAC	1	0.217791	0	1	NaN	1
ATATCA	9	0.322724	0.0889651	0.122063	0.470223	0.199275
ATATCC	9	0.216144	0.0879175	0.114716	0.459214	0.191335
ATATCT	9	0.187159	0.0720254	0.0366931	0.308202	0.0985656
ATATGA	9	0.263638	0.0677335	0.0250349	0.272566	0.0803724
ATATGC	9	0.0978837	0.0453165	0.00160531	0.122005	0.0281761
ATATGG	9	0.13223	0.0559504	0.00709453	0.185982	0.0492217
ATATGT	8	0.0730795	0.0399036	0.00139075	0.0945995	0.0275167
ATATTA	1	0.0478117	0	1	NaN	1
ATATTC	7	0.155054	0.0973946	0.240318	0.563552	0.328246
ATATTG	9	0.176736	0.0695201	0.0294836	0.287134	0.087454
ATCAAC	9	0.330178	0.0902116	0.131176	0.483491	0.209497
ATCAAG	9	0.206847	0.0834325	0.086476	0.413556	0.158548
ATCAAT	9	0.119979	0.0442796	0.00135731	0.116485	0.0275167
ATCACA	9	0.309993	0.0687662	0.027539	0.28094	0.084298
ATCACC	7	0.241042	0.0822427	0.121724	0.401846	0.199031
ATCACG	1	0.129485	0	1	NaN	1
ATCACT	8	0.211286	0.0724152	0.0508502	0.311547	0.116487
ATCAGA	9	0.169734	0.047387	0.00221418	0.133408	0.0318266
ATCAGC	9	0.407496	0.0561401	0.00726065	0.187245	0.0493186
ATCAGG	9	0.111076	0.0663627	0.0219836	0.261645	0.0764826
ATCAGT	9	0.272866	0.0661118	0.0214576	0.259671	0.0755778
ATCATC	9	0.229974	0.136079	0.640602	1.10013	0.730564
ATCATG	8	0.0961762	0.0730827	0.0534194	0.317317	0.120339
ATCCAA	6	0.265081	0.143364	0.703868	1.22108	0.798391
ATCCAC	1	0.0653058	0	1	NaN	1
ATCCAG	9	0.162777	0.0647925	0.0188486	0.24941	0.0714823
ATCCAT	3	0.189509	0.0632116	0.211313	0.237388	0.296815
ATCCCA	9	0.31539	0.0554592	0.0066786	0.18273	0.0475173
ATCCCG	1	0.123097	0	1	NaN	1
ATCCCT	8	0.0692823	0.0871243	0.129879	0.450965	0.208163
ATCCGC	9	0.237518	0.108067	0.302577	0.693824	0.391097
ATCCTA	9	0.187854	0.135913	0.638729	1.09745	0.729218
ATCCTC	9	0.278546	0.102413	0.240831	0.623123	0.328633
ATCCTG	9	0.192963	0.0742012	0.0439489	0.327104	0.107707
ATCCTT	9	0.132617	0.0856096	0.0995371	0.435421	0.175467
ATCGAA	9	0.21804	0.0865865	0.105794	0.445415	0.182624
ATCGAC	9	0.124208	0.0578353	0.00888817	0.198724	0.0523519
ATCGAG	9	0.157306	0.076302	0.0518979	0.345888	0.118031
ATCGCC	1	-0.000348507	0	1	NaN	1
ATCGCT	7	0.159806	0.0657582	0.043308	0.2569	0.106633
ATCGGA	9	0.19916	0.0968057	0.186003	0.556758	0.270857
ATCGGG	7	0.0537419	0.0612342	0.0304033	0.222768	0.0882783
ATCGGT	9	0.161667	0.0867222	0.106682	0.446812	0.183556
ATCGTC	9	0.065912	0.0787298	0.0623106	0.36825	0.131841
ATCGTG	9	0.111049	0.0305327	8.41607e-05	0.0553853	0.0126602
ATCTAA	7	0.0546953	0.0595047	0.026301	0.210361	0.0826714
ATCTAG	1	0.0570485	0	1	NaN	1
ATCTAT	9	0.165544	0.0533887	0.0051362	0.169341	0.0419742
ATCTCA	9	0.27033	0.0671903	0.0237895	0.268212	0.0788004
ATCTCC	9	0.239587	0.0665181	0.0223145	0.262872	0.0769557
ATCTCG	1	0.099736	0	1	NaN	1
ATCTCT	8	0.0872179	0.0554001	0.010942	0.182341	0.0570394
ATCTGA	9	0.260262	0.0751965	0.0475958	0.335938	0.112541
ATCTGC	9	0.307258	0.0738399	0.042677	0.323927	0.10596
ATCTGG	9	0.148714	0.0492175	0.00290115	0.143914	0.0340223
ATCTGT	9	0.229472	0.0458838	0.00175625	0.125079	0.0288958
ATCTTA	9	0.190095	0.0831789	0.085033	0.411046	0.156494
ATCTTC	8	0.0423577	0.0890709	0.144017	0.471342	0.224003
ATCTTG	9	0.183154	0.104773	0.265898	0.652171	0.353971
ATCTTT	1	-0.0281388	0	1	NaN	1
ATGAAC	9	0.270552	0.051336	0.00390634	0.15657	0.0384168
ATGAAG	9	0.2452	0.0646811	0.0186402	0.248553	0.0714273
ATGAAT	9	0.231203	0.057846	0.00889933	0.198798	0.0523519
ATGACA	9	0.338089	0.0571837	0.00823121	0.194271	0.0507859
ATGACC	9	0.18503	0.125242	0.511561	0.93189	0.60616
ATGACG	8	0.162898	0.106344	0.303863	0.671874	0.392438
ATGACT	9	0.203653	0.0645973	0.0184845	0.247909	0.0711952
ATGAGA	9	0.353803	0.122277	0.474775	0.888288	0.568974
ATGAGC	7	-0.0216006	0.074789	0.0797436	0.332307	0.150935
ATGAGG	9	0.115247	0.074437	0.0447941	0.329187	0.108779
ATGAGT	9	0.155304	0.086855	0.107557	0.448182	0.18426
ATGATA	9	0.193939	0.0672564	0.0239385	0.26874	0.0788004
ATGATC	8	0.166238	0.110144	0.345562	0.720754	0.434566
ATGATG	9	0.201155	0.0456151	0.00168335	0.123618	0.0285898
ATGATT	8	0.0412882	0.0627074	0.0227521	0.233615	0.0774473
ATGCAA	9	0.11623	0.0400266	0.000647177	0.0951836	0.0244637
ATGCAC	8	0.0991437	0.103717	0.276123	0.639099	0.363902
ATGCAG	9	0.206406	0.0416621	0.000869516	0.103121	0.0254611
ATGCAT	9	0.0353683	0.0358051	0.000281788	0.0761649	0.0222542
ATGCCA	9	0.362916	0.120656	0.454605	0.864893	0.548758
ATGCCC	9	0.197682	0.047126	0.00212826	0.131943	0.0316278
ATGCCG	9	0.134415	0.0462528	0.00186062	0.127099	0.0294754
ATGCCT	9	0.311316	0.0433239	0.00115793	0.111512	0.0271448
ATGCGA	9	0.170185	0.0312781	0.00010119	0.0581227	0.0128448
ATGCGC	8	0.116823	0.0686542	0.0379954	0.280027	0.10061
ATGCGG	8	0.170662	0.0840288	0.10919	0.419489	0.185658
ATGCGT	7	0.0449366	0.0637137	0.0370703	0.241174	0.0990737
ATGCTA	9	0.17692	0.0700206	0.0308305	0.291283	0.0890252
ATGCTC	9	0.359005	0.076636	0.0532511	0.348924	0.120329
ATGCTG	9	0.240834	0.0650709	0.0193776	0.251558	0.0721011
ATGCTT	9	0.227288	0.063672	0.0168321	0.240858	0.068247
ATGGAA	9	0.331585	0.0694157	0.0292085	0.286273	0.0868829
ATGGAC	9	0.243563	0.0713742	0.0347051	0.302655	0.0952506
ATGGAG	9	0.0993043	0.0495979	0.00306394	0.146147	0.0346917
ATGGAT	8	0.082451	0.046675	0.00379528	0.12943	0.038285
ATGGCA	9	0.341086	0.0647535	0.0187754	0.24911	0.0714598
ATGGCC	9	0.162257	0.0942844	0.163747	0.528134	0.246558
ATGGCT	9	0.298536	0.0682147	0.0261793	0.276452	0.0826403
ATGGGA	9	0.360191	0.0926709	0.150337	0.510213	0.230877
ATGGGC	9	0.161083	0.102345	0.24013	0.622302	0.328244
ATGGGT	9	0.0988707	0.0701074	0.0310689	0.292006	0.0895278
ATGGTA	1	0.250067	0	1	NaN	1
ATGGTC	8	0.0727901	0.0793721	0.0822153	0.374283	0.153713
ATGGTG	9	0.260772	0.0486591	0.00267519	0.140667	0.0332005
ATGGTT	9	0.204534	0.0557012	0.00688098	0.184329	0.0484121
ATGTAG	8	0.0589756	0.0626198	0.0225693	0.232964	0.0772859
ATGTAT	1	-0.0406151	0	1	NaN	1
ATGTCA	9	0.262139	0.0772651	0.0558673	0.354676	0.123502
ATGTCC	9	0.122876	0.0658458	0.0209104	0.257585	0.0749784
ATGTCT	9	0.141637	0.0491044	0.00285417	0.143253	0.0338959
ATGTGA	9	0.31799	0.0618821	0.0139638	0.227507	0.0635653
ATGTGC	9	0.229487	0.0575542	0.00859986	0.196797	0.052009
ATGTGG	9	0.0956486	0.0378191	0.00042456	0.0849741	0.0244637
ATGTGT	9	0.142278	0.0298376	7.05578e-05	0.0528924	0.0115372
ATGTTA	8	0.18491	0.0630414	0.02346	0.236111	0.0782577
ATGTTC	9	0.218486	0.0574569	0.00850171	0.196132	0.0515488
ATGTTT	9	0.0952025	0.104385	0.261705	0.647352	0.349715
ATTAAA	9	0.131789	0.0528036	0.00475735	0.16565	0.0410868
ATTAAC	8	0.0477437	0.0953428	0.195315	0.540057	0.28071
ATTAAG	9	0.147445	0.0578403	0.00889341	0.198758	0.0523519
ATTACA	9	0.20187	0.0683894	0.0266044	0.27787	0.0830186
ATTACC	9	0.119319	0.0584483	0.00954391	0.202959	0.0533606
ATTACG	8	0.180892	0.122444	0.487392	0.890718	0.581008
ATTACT	8	0.222925	0.0676911	0.035125	0.272225	0.0956027
ATTAGA	9	0.141392	0.0949753	0.16969	0.535903	0.254294
ATTAGC	8	0.26784	0.0956613	0.198145	0.543672	0.283873
ATTATA	9	0.153337	0.0590939	0.0102756	0.207467	0.0557743
ATTATC	1	0.0351431	0	1	NaN	1
ATTATG	1	0.155129	0	1	NaN	1
ATTATT	9	0.142851	0.0661186	0.0214717	0.259724	0.0755778
ATTCAA	9	0.180235	0.134349	0.62089	1.07234	0.712974
ATTCAC	9	0.411614	0.109554	0.319704	0.713054	0.408884
ATTCAG	9	0.135512	0.0714156	0.034829	0.303006	0.0955076
ATTCAT	9	0.152247	0.0438789	0.0012705	0.114387	0.0275167
ATTCCA	9	0.323888	0.0539294	0.0055078	0.172789	0.0430672
ATTCCC	9	0.311295	0.0864185	0.1047	0.443688	0.18143
ATTCCT	9	0.166116	0.0490952	0.00285035	0.1432	0.0338959
ATTCGA	3	0.0705319	0.0837918	0.341057	0.417126	0.429585
ATTCTA	9	0.152096	0.0615805	0.0135208	0.225295	0.0625404
ATTCTC	7	0.120873	0.117873	0.450094	0.825451	0.545187
ATTCTG	9	0.101424	0.0551913	0.00646025	0.18097	0.0470228
ATTCTT	9	0.170513	0.0655365	0.0202878	0.255171	0.0739206
ATTGAA	8	0.236299	0.0452615	0.00312402	0.121709	0.0349851
ATTGAC	7	0.0708299	0.0663747	0.0453262	0.261739	0.109347
ATTGAG	8	0.0486332	0.0581531	0.0146287	0.200914	0.0643124
ATTGAT	9	0.109545	0.0517106	0.00411068	0.158863	0.0389554
ATTGCC	8	0.102893	0.0741197	0.0575893	0.326386	0.125812
ATTGCG	8	0.0795337	0.0432534	0.002339	0.111149	0.0318266
ATTGCT	9	0.193032	0.0639103	0.0172461	0.242664	0.0689671
ATTGGA	9	0.165979	0.0659551	0.021134	0.258441	0.0752514
ATTGGC	1	0.108482	0	1	NaN	1
ATTGGT	9	0.0966717	0.0640877	0.0175596	0.244013	0.0689671
ATTGTA	8	0.224947	0.0840298	0.109197	0.419499	0.185658
ATTGTC	1	0.122615	0	1	NaN	1
ATTGTT	8	0.0418843	0.0693898	0.0403	0.286059	0.102776
ATTTAC	1	0.261178	0	1	NaN	1
ATTTAG	9	0.145373	0.056123	0.00724552	0.187131	0.0493186
ATTTAT	9	0.125697	0.0512762	0.00387453	0.156206	0.0384168
ATTTCA	9	0.284199	0.0770672	0.0550348	0.352861	0.122519
ATTTCC	9	0.127243	0.0392738	0.00056224	0.0916368	0.0244637
ATTTCG	9	0.0853807	0.0517217	0.00411688	0.158932	0.0389554
ATTTCT	9	0.112913	0.0800461	0.0685313	0.380667	0.139098
ATTTGA	9	0.132458	0.0451356	0.00155952	0.121033	0.0280213
ATTTGC	9	0.0814341	0.0534583	0.00518284	0.169783	0.0420889
ATTTGG	9	0.106342	0.059532	0.0107972	0.210555	0.056794
CAAACA	9	0.399473	0.0886889	0.120099	0.467308	0.197335
CAAACC	9	0.322241	0.0818978	0.0779914	0.398482	0.149436
CAAACG	9	0.185712	0.0772355	0.0557423	0.354404	0.123312
CAAACT	9	0.373538	0.0472876	0.00218112	0.132849	0.0316865
CAAAGA	9	0.269701	0.0658324	0.0208831	0.25748	0.0749656
CAAAGC	9	0.341019	0.0615379	0.0134591	0.224983	0.0624856
CAAAGG	9	0.177302	0.0560424	0.00717467	0.186594	0.0492217
CAAAGT	9	0.321852	0.0750055	0.0468798	0.334234	0.111816
CAAATA	9	0.264043	0.106152	0.281034	0.669457	0.368445
CAAATC	8	0.192149	0.0884336	0.139293	0.464621	0.218686
CAAATG	9	0.326269	0.0660108	0.0212486	0.258878	0.0752514
CAAATT	9	0.167535	0.050253	0.00336186	0.150033	0.0360003
CAACAA	9	0.394136	0.0474961	0.00225094	0.134023	0.0318266
CAACAC	9	0.271455	0.0623611	0.0146905	0.231042	0.0643124
CAACAG	9	0.348815	0.0900543	0.130004	0.481807	0.208257
CAACAT	9	0.157481	0.0917208	0.14275	0.499805	0.22258
CAACCA	9	0.390776	0.0949326	0.169319	0.53542	0.253858
CAACCC	8	0.0906973	0.0650188	0.0279952	0.251155	0.0851173
CAACCG	9	0.212337	0.0573542	0.00839922	0.195432	0.0512223
CAACCT	9	0.269766	0.0731965	0.0404789	0.318306	0.102828
CAACGA	9	0.309362	0.0954518	0.173858	0.541294	0.257969
CAACGC	8	0.144963	0.0502229	0.00600217	0.149854	0.0452527
CAACGG	1	-0.0230153	0	1	NaN	1
CAACGT	9	0.132569	0.0714411	0.0349055	0.303222	0.0956027
CAACTA	9	0.282864	0.0732002	0.0404912	0.318338	0.102828
CAACTC	9	0.315189	0.109512	0.319218	0.71251	0.408428
CAACTG	1	0.0901853	0	1	NaN	1
CAACTT	9	0.315138	0.089755	0.127791	0.47861	0.205756
CAAGAA	9	0.393138	0.0691793	0.0285922	0.284326	0.0858581
CAAGAC	9	0.306287	0.0658261	0.0208703	0.257431	0.0749656
CAAGAG	9	0.203314	0.051591	0.00404453	0.15813	0.0389554
CAAGAT	9	0.259728	0.0655582	0.020331	0.25534	0.0739925
CAAGCA	9	0.386745	0.0547016	0.00607596	0.177772	0.0454833
CAAGCC	9	0.280381	0.059602	0.0108824	0.211051	0.0569164
CAAGCG	7	0.133025	0.109939	0.364978	0.718067	0.453924
CAAGCT	9	0.326159	0.0628399	0.0154465	0.234604	0.0656735
CAAGGA	9	0.402104	0.0729039	0.0395072	0.315767	0.102547
CAAGGC	8	0.202025	0.0834857	0.105789	0.414084	0.182624
CAAGGG	1	0.120484	0	1	NaN	1
CAAGGT	9	0.140164	0.0698197	0.0302845	0.289615	0.0882783
CAAGTA	8	0.0815776	0.0927214	0.172833	0.510768	0.257017
CAAGTC	9	0.389709	0.0695174	0.0294765	0.287112	0.087454
CAAGTG	7	0.077523	0.0697562	0.0575817	0.289088	0.125812
CAAGTT	9	0.264189	0.0526629	0.00466972	0.164768	0.0408633
CAATAA	9	0.231331	0.118684	0.430105	0.836857	0.523383
CAATAC	1	0.248207	0	1	NaN	1
CAATAG	1	0.163759	0	1	NaN	1
CAATAT	1	0.0453502	0	1	NaN	1
CAATCA	9	0.383545	0.0758768	0.0502117	0.342045	0.115696
CAATCC	9	0.217386	0.0484276	0.00258584	0.139332	0.0330919
CAATCT	9	0.197514	0.0512082	0.00383854	0.155791	0.0384168
CAATGA	9	0.297492	0.0737946	0.0425193	0.323529	0.105763
CAATGC	9	0.250838	0.0404465	0.000699079	0.097191	0.0244637
CAATGG	9	0.245552	0.0492717	0.00292393	0.144231	0.0340223
CAATGT	9	0.334579	0.0953917	0.173329	0.540612	0.257547
CAATTA	9	0.205816	0.0936057	0.158026	0.520557	0.238967
CAATTC	9	0.193541	0.056429	0.00751959	0.189177	0.049647
CACAAA	6	0.281434	0.1248	0.536857	0.925324	0.632207
CACAAC	9	0.330222	0.125169	0.510656	0.9308	0.605541
CACAAG	9	0.187953	0.032875	0.000147825	0.064209	0.0154925
CACAAT	9	0.2017	0.0529822	0.00487053	0.166773	0.0414717
CACACA	9	0.500718	0.0822873	0.0800888	0.402281	0.151391
CACACC	9	0.0609605	0.100805	0.224401	0.603716	0.311051
CACACG	8	0.171964	0.097783	0.217517	0.568056	0.303238
CACACT	7	0.114727	0.115812	0.427804	0.796842	0.520984
CACAGA	9	0.361905	0.0794212	0.0655265	0.374746	0.135275
CACAGC	9	0.249878	0.123192	0.486153	0.901633	0.579749
CACAGG	9	0.181079	0.0579943	0.00905472	0.199818	0.0526218
CACAGT	9	0.335318	0.0598176	0.0111483	0.21258	0.0570785
CACATA	8	0.393115	0.089552	0.147644	0.476447	0.228173
CACATC	9	0.43211	0.0758933	0.0502763	0.342193	0.11576
CACATG	9	0.348862	0.0636928	0.0168679	0.241015	0.068247
CACATT	9	0.265208	0.0770862	0.055114	0.353035	0.122604
CACCAA	9	0.296584	0.0658243	0.0208668	0.257417	0.0749656
CACCAC	9	0.343995	0.0463993	0.00190344	0.127905	0.0294754
CACCAG	9	0.177522	0.0437585	0.00124533	0.11376	0.0275104
CACCAT	9	0.298851	0.0446558	0.00144331	0.118473	0.0275167
CACCCA	9	0.327776	0.110271	0.328064	0.722411	0.416708
CACCCG	8	0.0998636	0.0450251	0.0030218	0.120441	0.0346573
CACCCT	9	0.285845	0.0891535	0.123415	0.472217	0.200962
CACCGA	9	0.386463	0.127737	0.542222	0.969388	0.636995
CACCGC	1	0.0888333	0	1	NaN	1
CACCGT	6	0.12876	0.0995093	0.290988	0.58829	0.37844
CACCTA	9	0.172	0.09654	0.183584	0.553705	0.268243
CACCTC	9	0.294888	0.08112	0.0739149	0.390949	0.144706
CACCTG	9	0.17918	0.0473044	0.00218666	0.132943	0.0316865
CACCTT	9	0.263173	0.0994223	0.21071	0.587262	0.296231
CACGAC	8	0.187276	0.0599668	0.0175384	0.213642	0.0689671
CACGAT	1	0.200917	0	1	NaN	1
CACGCA	9	0.29385	0.112607	0.355763	0.753342	0.444739
CACGCC	9	0.376832	0.0830591	0.0843572	0.409863	0.15593
CACGGA	9	0.183566	0.0672218	0.0238604	0.268463	0.0788004
CACGGG	9	0.0698663	0.0606118	0.0121725	0.218263	0.0591583
CACGTG	8	0.271095	0.101596	0.254472	0.613217	0.342658
CACTAA	9	0.304162	0.0866127	0.105965	0.445685	0.18272
CACTAC	9	0.221019	0.0618827	0.0139646	0.227511	0.0635653
CACTAG	1	-0.0533748	0	1	NaN	1
CACTAT	9	0.307762	0.107482	0.295939	0.68634	0.383773
CACTCA	9	0.326828	0.0841045	0.0903783	0.420245	0.16352
CACTCC	9	0.394462	0.0880816	0.115848	0.46093	0.192512
CACTCT	9	0.211761	0.093411	0.156406	0.518394	0.236972
CACTGA	9	0.311147	0.0940063	0.161389	0.525023	0.243123
CACTGC	9	0.130329	0.0793062	0.0649837	0.373662	0.135093
CACTGG	9	0.335417	0.0741814	0.0438787	0.32693	0.107619
CACTGT	9	0.251091	0.101473	0.231161	0.611742	0.318187
CACTTA	7	0.155847	0.0847572	0.138402	0.426793	0.21741
CACTTC	7	0.307382	0.171091	0.892441	1.73907	0.996251
CACTTG	9	0.147643	0.0919248	0.144359	0.50203	0.224294
CACTTT	9	0.163981	0.077134	0.0553145	0.353473	0.122796
CAGAAA	9	0.278417	0.0634254	0.0164117	0.238996	0.0679481
CAGAAC	9	0.209469	0.0477757	0.00234745	0.135606	0.0318266
CAGAAG	9	0.197833	0.0517258	0.00411914	0.158957	0.0389554
CAGAAT	9	0.262715	0.0553716	0.00660655	0.182154	0.0475173
CAGACA	9	0.41686	0.0627168	0.0152493	0.233686	0.0652511
CAGACC	9	0.326605	0.0597395	0.0110513	0.212025	0.0570785
CAGACG	9	0.291122	0.0751692	0.0474932	0.335695	0.112467
CAGACT	9	0.312145	0.0576367	0.00868365	0.197361	0.0520968
CAGAGA	9	0.3387	0.0933881	0.156217	0.518141	0.236799
CAGAGC	9	0.307555	0.0987814	0.204511	0.579715	0.290271
CAGAGG	9	0.0855771	0.0611202	0.0128661	0.221939	0.0609357
CAGAGT	9	0.153189	0.0958528	0.177408	0.545851	0.262007
CAGATA	9	0.223719	0.0497115	0.00311399	0.146818	0.0349851
CAGATC	9	0.228118	0.0632063	0.0160452	0.237348	0.0673131
CAGATG	9	0.234168	0.0412787	0.00081236	0.101232	0.0252212
CAGATT	9	0.136913	0.0546255	0.00601793	0.177278	0.0452634
CAGCAA	9	0.429837	0.0918977	0.144145	0.501734	0.224092
CAGCAC	9	0.252318	0.0422105	0.000957134	0.105854	0.0265227
CAGCAG	9	0.436178	0.105107	0.269535	0.65634	0.357307
CAGCAT	9	0.301376	0.0782782	0.0602709	0.364037	0.129169
CAGCCA	9	0.480565	0.0915499	0.14141	0.497943	0.221145
CAGCCC	8	0.131635	0.135011	0.628934	1.08293	0.719231
CAGCCG	7	0.114876	0.0790724	0.102506	0.371462	0.178963
CAGCCT	9	0.410353	0.06766	0.0248637	0.271975	0.079984
CAGCGA	9	0.312108	0.0931777	0.154478	0.515808	0.234839
CAGCGC	8	0.150764	0.0803728	0.0875956	0.38378	0.160321
CAGCGG	9	0.0622663	0.105527	0.274132	0.661595	0.362033
CAGCGT	9	0.135422	0.0610597	0.0127821	0.2215	0.0607383
CAGCTA	9	0.320049	0.0764667	0.0525619	0.347383	0.119254
CAGCTC	3	0.271416	0.0685756	0.243749	0.279385	0.331327
CAGCTG	1	-0.118871	0	1	NaN	1
CAGCTT	9	0.24369	0.0476595	0.00230691	0.134947	0.0318266
CAGGAA	9	0.223977	0.0478051	0.0023578	0.135773	0.0318302
CAGGAC	8	0.37015	0.097384	0.213806	0.56343	0.29912
CAGGAG	9	0.24904	0.0639458	0.0173085	0.242934	0.0689671
CAGGAT	9	0.301278	0.0774727	0.0567505	0.356584	0.125012
CAGGCA	9	0.342424	0.113347	0.364664	0.763278	0.453712
CAGGCC	9	0.393628	0.077677	0.0576291	0.358467	0.125812
CAGGCT	9	0.300054	0.0611993	0.0129768	0.222514	0.0609587
CAGGGA	9	0.288421	0.0839635	0.08955	0.418837	0.162486
CAGGGT	9	0.107301	0.0739791	0.0431639	0.325149	0.106561
CAGGTA	9	0.314819	0.0492848	0.00292943	0.144308	0.0340223
CAGGTC	9	0.250289	0.0667378	0.0227886	0.264611	0.0774473
CAGGTG	9	0.15022	0.0665449	0.0223718	0.263083	0.0769854
CAGGTT	9	0.241483	0.108643	0.309177	0.701247	0.398
CAGTAA	9	0.251518	0.0690423	0.0282397	0.283201	0.0855152
CAGTAC	9	0.224406	0.0476512	0.00230407	0.1349	0.0318266
CAGTAG	9	0.17725	0.0816968	0.0769238	0.396529	0.148326
CAGTAT	9	0.354082	0.116633	0.404746	0.808176	0.495963
CAGTCA	9	0.389364	0.059793	0.0111176	0.212405	0.0570785
CAGTCC	9	0.260714	0.0479066	0.0023938	0.13635	0.0320424
CAGTCG	9	0.116359	0.0226508	8.35758e-06	0.0304812	0.00460382
CAGTCT	9	0.199775	0.106992	0.290411	0.680093	0.377845
CAGTGA	9	0.318594	0.0635125	0.0165592	0.239653	0.0682013
CAGTGC	8	0.0644971	0.0299728	0.000209648	0.0533728	0.0183967
CAGTGT	9	0.232814	0.0727105	0.0388743	0.314093	0.101814
CAGTTA	9	0.217375	0.0591944	0.0103935	0.208174	0.055851
CAGTTC	9	0.297606	0.0500759	0.00327906	0.148978	0.0353535
CAGTTG	9	0.224997	0.0436479	0.00122258	0.113186	0.0273909
CAGTTT	9	0.206409	0.0735381	0.0416351	0.321284	0.104665
CATAAA	8	0.1567	0.084831	0.11434	0.427537	0.191212
CATAAG	9	0.0589457	0.0432699	0.00114743	0.111234	0.0271448
CATAAT	9	0.135025	0.0673215	0.024086	0.26926	0.079011
CATACC	9	0.363251	0.0687265	0.0274394	0.280616	0.084298
CATACG	1	0.032717	0	1	NaN	1
CATACT	9	0.240922	0.0726618	0.0387163	0.313673	0.101744
CATAGA	7	0.186855	0.072778	0.0703066	0.314677	0.140747
CATAGC	9	0.21683	0.0853339	0.0978158	0.432621	0.173791
CATAGG	9	0.0592651	0.115109	0.38606	0.787198	0.476764
CATAGT	8	0.238899	0.0704384	0.0437586	0.29477	0.107491
CATATC	9	0.202449	0.0752345	0.0477395	0.336278	0.11264
CATATG	8	0.130496	0.0631155	0.0236191	0.236666	0.0785396
CATATT	9	0.176367	0.087973	0.115099	0.459794	0.191758
CATCAA	9	0.360107	0.0813319	0.0750109	0.392994	0.145642
CATCAC	9	0.21837	0.0528496	0.00478631	0.165939	0.0410868
CATCAG	9	0.273712	0.0636145	0.0167333	0.240423	0.068247
CATCAT	9	0.238659	0.0634146	0.0163935	0.238915	0.0679481
CATCCA	9	0.411398	0.0667457	0.0228058	0.264674	0.0774473
CATCCC	9	0.305596	0.0678984	0.0254228	0.273895	0.0812861
CATCCG	9	0.102116	0.0533651	0.00512049	0.169192	0.0419742
CATCCT	9	0.294782	0.0783443	0.0605666	0.364653	0.12954
CATCGA	9	0.227663	0.06209	0.0142757	0.229038	0.0639422
CATCGC	9	0.15195	0.066946	0.023245	0.266265	0.0777924
CATCGG	9	0.120535	0.038255	0.000462432	0.0869442	0.0244637
CATCGT	9	0.260127	0.0637456	0.0169591	0.241415	0.068247
CATCTA	9	0.307439	0.0795941	0.0663485	0.37638	0.136498
CATCTC	9	0.288054	0.0784475	0.0610298	0.365614	0.130242
CATCTG	9	0.249924	0.0373353	0.000385637	0.0828142	0.0244637
CATCTT	9	0.231971	0.0697354	0.0300577	0.288916	0.0882783
CATGAA	9	0.220508	0.101112	0.227491	0.607392	0.314193
CATGAC	9	0.162275	0.0640871	0.0175585	0.244009	0.0689671
CATGAG	8	0.153755	0.0996284	0.235075	0.5897	0.32273
CATGAT	9	0.129397	0.0602441	0.0116894	0.215622	0.0582306
CATGCA	8	0.1177	0.0785771	0.0781012	0.366823	0.149436
CATGCC	9	0.321224	0.102511	0.241848	0.624313	0.329735
CATGCG	9	0.117368	0.0837371	0.0882305	0.416581	0.16111
CATGCT	9	0.265518	0.0657307	0.0206769	0.256685	0.0744794
CATGGA	9	0.285826	0.0743884	0.044619	0.328757	0.108508
CATGGC	2	0.0516122	0.00571512	0.035136	0.00194051	0.0956027
CATGGG	9	0.0663225	0.0521496	0.00436116	0.161572	0.0403567
CATGGT	9	0.377554	0.109798	0.322541	0.716232	0.410935
CATGTG	9	0.190914	0.0823035	0.0801766	0.402439	0.151391
CATGTT	7	0.207363	0.0889574	0.169035	0.470141	0.253552
CATTAA	8	0.106168	0.0355183	0.000649053	0.0749494	0.0244637
CATTAC	3	0.154177	0.0890824	0.375906	0.471464	0.466047
CATTCA	9	0.437313	0.0434447	0.00118167	0.112134	0.0271448
CATTCC	9	0.41028	0.0710394	0.0337147	0.299822	0.0938282
CATTCG	9	0.108461	0.0331108	0.000156064	0.0651333	0.0154925
CATTCT	9	0.229589	0.0515789	0.00403784	0.158055	0.0389554
CATTGA	9	0.236865	0.0425642	0.00101747	0.107635	0.0271448
CATTGC	9	0.181526	0.0683736	0.0265656	0.277742	0.0830186
CATTGG	9	0.136694	0.0528294	0.00477358	0.165812	0.0410868
CATTGT	9	0.300834	0.0989652	0.206279	0.581874	0.291821
CATTTA	9	0.150816	0.0841274	0.0905132	0.420474	0.163576
CATTTC	9	0.15632	0.0962622	0.181074	0.550524	0.265928
CATTTG	9	0.298844	0.11187	0.346958	0.743516	0.436008
CCAAAC	8	0.240375	0.0826989	0.10098	0.406316	0.177221
CCAAAG	9	0.389732	0.0854585	0.0985911	0.433885	0.174677
CCAAAT	9	0.264542	0.120504	0.452716	0.862718	0.547314
CCAACA	9	0.51001	0.0727368	0.03896	0.314321	0.101883
CCAACC	9	0.235255	0.077662	0.0575644	0.358329	0.125812
CCAACG	9	0.308598	0.0979645	0.196748	0.570167	0.282384
CCAACT	9	0.431166	0.0640962	0.0175747	0.244078	0.0689671
CCAAGA	9	0.48516	0.089414	0.125299	0.474981	0.203193
CCAAGC	9	0.389544	0.0692858	0.0288686	0.285202	0.0863597
CCAAGG	9	0.319244	0.0585094	0.00961133	0.203383	0.0533606
CCAAGT	9	0.447888	0.0780096	0.0590801	0.361543	0.1278
CCAATA	1	0.425649	0	1	NaN	1
CCAATC	9	0.315731	0.0895798	0.126507	0.476744	0.204627
CCAATG	9	0.326181	0.0513058	0.00389023	0.156386	0.0384168
CCAATT	9	0.404476	0.134505	0.622684	1.07483	0.714255
CCACAA	9	0.384369	0.0806042	0.0712939	0.385993	0.1418
CCACAC	9	0.188036	0.0825795	0.0816871	0.405143	0.153054
CCACAG	1	-0.0137251	0	1	NaN	1
CCACAT	9	0.270183	0.115415	0.389798	0.791386	0.480304
CCACCA	9	0.33994	0.0641846	0.0177326	0.244752	0.0694142
CCACCC	1	0.17636	0	1	NaN	1
CCACCG	1	0.186234	0	1	NaN	1
CCACCT	9	0.371325	0.0839112	0.089244	0.418316	0.162151
CCACGA	9	0.342286	0.109627	0.320554	0.714007	0.409144
CCACGC	1	-0.0761017	0	1	NaN	1
CCACTA	8	0.286342	0.0971385	0.211538	0.560592	0.296867
CCACTC	1	0.170613	0	1	NaN	1
CCACTG	9	0.401806	0.103145	0.248491	0.632064	0.336037
CCACTT	1	0.0816543	0	1	NaN	1
CCAGAA	9	0.440358	0.0384131	0.000476855	0.0876642	0.0244637
CCAGAC	9	0.317161	0.0778401	0.0583374	0.359974	0.12692
CCAGAG	9	0.311929	0.0991286	0.207858	0.583798	0.293429
CCAGAT	9	0.366713	0.0453294	0.00160861	0.122074	0.0281761
CCAGCA	9	0.612671	0.0513427	0.00390994	0.156611	0.0384168
CCAGCC	7	0.277996	0.0682044	0.0517045	0.276369	0.117761
CCAGCG	1	0.37788	0	1	NaN	1
CCAGCT	9	0.436026	0.131281	0.584967	1.02393	0.67913
CCAGGA	9	0.515042	0.0869068	0.107899	0.448716	0.184408
CCAGGC	8	0.274499	0.108176	0.323762	0.695228	0.412073
CCAGGG	9	0.193044	0.075537	0.0488926	0.338988	0.114234
CCAGGT	1	-0.0816515	0	1	NaN	1
CCAGTA	9	0.345746	0.0740862	0.043541	0.326091	0.10704
CCAGTC	9	0.537404	0.121913	0.470241	0.883001	0.564182
CCAGTG	9	0.251941	0.0836404	0.0876711	0.41562	0.160366
CCAGTT	9	0.359416	0.0906258	0.134294	0.487941	0.213076
CCATAC	9	0.422204	0.162775	0.873294	1.57412	0.976889
CCATCA	9	0.451342	0.0950034	0.169934	0.53622	0.254539
CCATCC	9	0.319233	0.0874709	0.111671	0.45456	0.188244
CCATCG	9	0.296091	0.126187	0.523217	0.946006	0.617885
CCATCT	9	0.434602	0.0681956	0.026133	0.276297	0.0826403
CCATGA	9	0.44175	0.069661	0.0298583	0.288299	0.0882275
CCATGC	8	0.303463	0.14592	0.73672	1.26501	0.832368
CCATGG	1	0.387554	0	1	NaN	1
CCATGT	9	0.385264	0.0606115	0.0121721	0.21826	0.0591583
CCATTA	1	0.184638	0	1	NaN	1
CCATTC	9	0.311723	0.0706534	0.0325992	0.296572	0.0921886
CCATTG	9	0.297144	0.166211	0.892495	1.64129	0.996251
CCCAAA	7	0.271498	0.133676	0.616894	1.06162	0.709417
CCCAAC	9	0.243731	0.0987239	0.203959	0.57904	0.289837
CCCAAG	9	0.268475	0.0436957	0.00123236	0.113434	0.0274156
CCCAAT	9	0.338924	0.0636067	0.01672	0.240365	0.068247
CCCACA	9	0.437368	0.0980406	0.197464	0.571053	0.283154
CCCACC	7	0.236544	0.121949	0.494179	0.883531	0.58821
CCCACG	1	0.0116815	0	1	NaN	1
CCCACT	9	0.305381	0.0637273	0.0169275	0.241277	0.068247
CCCAGA	9	0.42782	0.0787099	0.0622199	0.368064	0.13177
CCCAGC	9	0.430019	0.0818636	0.0778088	0.398149	0.149331
CCCAGG	8	0.292084	0.0977339	0.217058	0.567486	0.302938
CCCAGT	8	0.260398	0.135723	0.636503	1.09439	0.726939
CCCATA	3	0.166202	0.0648498	0.221082	0.249851	0.307528
CCCATC	9	0.178426	0.0729184	0.0395547	0.315892	0.102547
CCCATG	9	0.277429	0.0397436	0.000614062	0.0938424	0.0244637
CCCATT	9	0.261713	0.0575972	0.00864347	0.197091	0.052009
CCCGAA	6	0.125886	0.0803102	0.139352	0.383183	0.218686
CCCGAG	8	0.273675	0.153145	0.796975	1.39338	0.895959
CCCGGA	1	-0.0556793	0	1	NaN	1
CCCGGT	9	0.24459	0.0930779	0.153657	0.514704	0.234155
CCCGTT	8	0.151483	0.124186	0.507622	0.916242	0.602622
CCCTAC	8	0.244761	0.0810615	0.0914299	0.390385	0.16448
CCCTAG	7	0.0732456	0.103422	0.298004	0.635459	0.386134
CCCTAT	9	0.179445	0.0760212	0.0507797	0.343347	0.11641
CCCTCA	9	0.384082	0.100612	0.222465	0.601405	0.309044
CCCTCC	7	0.150424	0.0919399	0.192816	0.502195	0.278257
CCCTCG	9	0.158495	0.0567552	0.00782087	0.191371	0.0499319
CCCTCT	9	0.326073	0.0636321	0.0167634	0.240556	0.068247
CCCTGA	9	0.431691	0.0770949	0.0551504	0.353114	0.122604
CCCTGC	9	0.120709	0.0579415	0.00899918	0.199455	0.0526218
CCCTGG	9	0.24256	0.0844863	0.0926469	0.42407	0.166008
CCCTGT	9	0.333856	0.0652971	0.0198158	0.25331	0.0729178
CCCTTA	1	0.168182	0	1	NaN	1
CCCTTC	9	0.26803	0.12883	0.555526	0.986053	0.649484
CCCTTG	7	0.185359	0.127569	0.554138	0.966848	0.648341
CCCTTT	9	0.335701	0.102091	0.237497	0.619212	0.325349
CCGAAA	9	0.160065	0.105066	0.269088	0.655829	0.356972
CCGAAC	1	0.244937	0	1	NaN	1
CCGAAG	9	0.218279	0.0616084	0.0135613	0.225499	0.0625404
CCGAAT	9	0.203035	0.0806826	0.0716882	0.386744	0.14243
CCGACA	9	0.255822	0.0676001	0.0247246	0.271493	0.0798806
CCGACC	6	0.151471	0.0592925	0.0410911	0.208864	0.103762
CCGACT	9	0.425729	0.0983008	0.199925	0.574088	0.285646
CCGAGA	9	0.252551	0.0893073	0.124525	0.473848	0.202263
CCGAGC	1	0.238216	0	1	NaN	1
CCGAGG	9	0.213373	0.105322	0.271887	0.65903	0.35982
CCGAGT	9	0.277614	0.071481	0.0350253	0.303561	0.0956027
CCGATC	1	0.159591	0	1	NaN	1
CCGATG	1	0.130022	0	1	NaN	1
CCGATT	7	0.141067	0.0734118	0.073196	0.320181	0.144246
CCGCAG	8	0.147391	0.101844	0.256967	0.616218	0.344885
CCGCAT	9	0.24124	0.083084	0.0844977	0.410109	0.156094
CCGCCA	8	0.209308	0.0919876	0.166804	0.502716	0.250801
CCGCCT	1	0.209053	0	1	NaN	1
CCGCTA	2	0.148643	0.10716	0.59117	0.682224	0.68457
CCGCTT	9	0.230146	0.145057	0.734971	1.2501	0.830985
CCGGAA	7	0.17911	0.09223	0.195214	0.505369	0.280693
CCGGAG	7	0.222061	0.0933519	0.204632	0.517739	0.290271
CCGGAT	1	-0.0230608	0	1	NaN	1
CCGGCA	9	0.19936	0.0899879	0.129511	0.481097	0.207783
CCGGCT	1	0.189905	0	1	NaN	1
CCGGGA	9	0.206279	0.113259	0.363601	0.762091	0.452746
CCGGGT	1	0.071218	0	1	NaN	1
CCGGTC	8	0.0913717	0.0352171	0.000613585	0.0736839	0.0244637
CCGGTG	9	0.0892426	0.053396	0.00514108	0.169388	0.0419742
CCGGTT	1	0.108156	0	1	NaN	1
CCGTAA	9	0.171801	0.0854405	0.0984789	0.433702	0.174576
CCGTAC	9	0.272274	0.0842517	0.0912484	0.421717	0.164435
CCGTAT	7	0.15747	0.106751	0.331742	0.677036	0.420671
CCGTCA	9	0.388986	0.0659828	0.0211908	0.258658	0.0752514
CCGTCT	9	0.242766	0.0697698	0.0301501	0.289201	0.0882783
CCGTGA	1	0.209662	0	1	NaN	1
CCGTGG	1	0.152757	0	1	NaN	1
CCGTGT	9	0.258852	0.0461992	0.00184514	0.126804	0.0294754
CCGTTG	8	0.0508219	0.0416492	0.00183465	0.103057	0.0294754
CCGTTT	7	0.148726	0.0631481	0.0354649	0.236911	0.0963636
CCTAAA	8	0.0940078	0.119099	0.448399	0.842717	0.543342
CCTAAC	9	0.184111	0.0511432	0.00380445	0.155396	0.038285
CCTAAG	1	0.258985	0	1	NaN	1
CCTAAT	9	0.383019	0.0988841	0.205498	0.580921	0.290977
CCTACA	9	0.386155	0.0958898	0.177738	0.546272	0.26229
CCTACC	9	0.370598	0.0630659	0.0158136	0.236295	0.0666071
CCTACT	9	0.390912	0.0511451	0.00380547	0.155408	0.038285
CCTAGA	9	0.291295	0.0879896	0.115213	0.459968	0.191758
CCTAGC	7	0.386143	0.101606	0.280127	0.613347	0.367644
CCTAGT	2	0.324506	0.153103	0.762026	1.39263	0.858503
CCTATC	9	0.100416	0.0647656	0.0187982	0.249203	0.0714601
CCTATG	9	0.267385	0.071033	0.0336959	0.299768	0.0938282
CCTATT	9	0.31892	0.0720654	0.0368178	0.308544	0.0985656
CCTCAA	9	0.39746	0.0803694	0.0701223	0.383747	0.140645
CCTCAC	9	0.347372	0.104496	0.2629	0.648727	0.351015
CCTCAG	9	0.322108	0.0816616	0.0767376	0.396187	0.148175
CCTCAT	9	0.306795	0.0870472	0.10883	0.450167	0.185434
CCTCCA	9	0.295816	0.0965044	0.183261	0.553297	0.26802
CCTCCC	9	0.153714	0.0919384	0.144467	0.502179	0.224294
CCTCCG	9	0.245685	0.0665071	0.0222908	0.262785	0.0769557
CCTCCT	9	0.409924	0.124908	0.507436	0.926931	0.602622
CCTCGA	1	0.0515166	0	1	NaN	1
CCTCGG	9	0.27151	0.065674	0.0205629	0.256243	0.0743052
CCTCGT	1	0.0495901	0	1	NaN	1
CCTCTA	9	0.2126	0.0687	0.0273731	0.2804	0.084298
CCTCTC	9	0.285932	0.129006	0.557655	0.988744	0.65125
CCTCTG	9	0.163028	0.104099	0.258628	0.643806	0.34663
CCTCTT	9	0.280177	0.0794986	0.0658935	0.375477	0.135784
CCTGAA	9	0.41064	0.123487	0.489819	0.905959	0.58346
CCTGAC	9	0.334769	0.0672177	0.0238512	0.26843	0.0788004
CCTGAG	9	0.177376	0.100727	0.223617	0.60278	0.310146
CCTGAT	8	0.282428	0.110036	0.344352	0.719337	0.433562
CCTGCA	9	0.459384	0.0825664	0.0816149	0.405015	0.15301
CCTGCC	9	0.340699	0.0925223	0.149135	0.508578	0.229701
CCTGCT	8	0.153949	0.0947335	0.189961	0.533178	0.274891
CCTGGA	9	0.288266	0.0578123	0.00886434	0.198566	0.0523519
CCTGGC	8	0.34676	0.0486539	0.00492588	0.140637	0.0414784
CCTGGT	9	0.327871	0.0720432	0.0367486	0.308355	0.0985656
CCTGTA	9	0.366605	0.133032	0.605606	1.05141	0.69847
CCTGTC	8	0.166596	0.147918	0.75434	1.29989	0.850753
CCTGTG	8	0.161421	0.104032	0.279397	0.642987	0.366992
CCTGTT	9	0.327336	0.103165	0.248698	0.632305	0.336173
CCTTAA	9	0.164093	0.0981628	0.198617	0.572477	0.284035
CCTTAC	9	0.29997	0.0759348	0.0504391	0.342567	0.115966
CCTTAG	8	0.177531	0.0752148	0.062235	0.336102	0.13177
CCTTAT	9	0.197071	0.0726494	0.0386762	0.313566	0.101744
CCTTCA	9	0.419215	0.0639208	0.0172646	0.242744	0.0689671
CCTTCC	1	0.103792	0	1	NaN	1
CCTTCG	9	0.194513	0.0750578	0.0470751	0.3347	0.111816
CCTTCT	9	0.396722	0.0833804	0.0861783	0.41304	0.158272
CCTTGA	9	0.387699	0.0791013	0.0640245	0.371733	0.133896
CCTTGC	9	0.262421	0.0861585	0.103022	0.441022	0.179308
CCTTGG	9	0.306002	0.0822065	0.0796504	0.401491	0.150935
CCTTGT	9	0.15324	0.0699741	0.0307036	0.290897	0.0888211
CCTTTA	8	0.145729	0.0838542	0.108089	0.417748	0.18457
CCTTTC	9	0.327993	0.0737477	0.0423567	0.323118	0.105515
CCTTTG	9	0.301502	0.0566568	0.00772898	0.190708	0.049767
CGAAAG	8	0.130838	0.0536256	0.0089818	0.170847	0.0526218
CGAACC	9	0.252184	0.0861644	0.10306	0.441083	0.179308
CGAACT	9	0.233852	0.0954384	0.173739	0.541141	0.257969
CGAAGA	9	0.378096	0.0908655	0.136118	0.490526	0.215214
CGAAGC	8	0.151852	0.0963663	0.204482	0.551715	0.290271
CGAAGG	8	0.159738	0.0583853	0.0149788	0.202522	0.0649081
CGAAGT	9	0.262971	0.0554367	0.00666006	0.182582	0.0475173
CGAATC	1	-0.0875187	0	1	NaN	1
CGAATT	9	0.237386	0.0961193	0.179789	0.54889	0.264657
CGACAA	8	0.410793	0.134038	0.618494	1.06739	0.710998
CGACAC	8	0.0767876	0.0731246	0.0535835	0.317681	0.120391
CGACAG	9	0.114209	0.0935466	0.157533	0.5199	0.238336
CGACAT	7	0.186362	0.0871225	0.155232	0.450947	0.235533
CGACCA	7	0.282212	0.104156	0.305339	0.644509	0.393862
CGACCT	9	0.202848	0.0869125	0.107936	0.448775	0.184408
CGACGA	1	0.162249	0	1	NaN	1
CGACGT	9	0.172501	0.0818407	0.0776872	0.397927	0.149188
CGACTA	9	0.35774	0.07195	0.0364587	0.307558	0.0981305
CGACTG	9	0.173939	0.0626241	0.015102	0.232995	0.0651472
CGACTT	1	0.266278	0	1	NaN	1
CGAGAA	9	0.40238	0.142446	0.709032	1.20549	0.803671
CGAGAC	7	0.230141	0.091883	0.192347	0.501574	0.277708
CGAGAG	9	0.250945	0.162588	0.87218	1.5705	0.975989
CGAGAT	9	0.188676	0.0796942	0.0668274	0.377327	0.136905
CGAGCA	9	0.361968	0.102557	0.242325	0.624872	0.330101
CGAGCT	9	0.243333	0.0989813	0.206435	0.582064	0.29191
CGAGGA	9	0.38694	0.111295	0.340135	0.735899	0.428936
CGAGGT	9	0.383742	0.0666711	0.0226439	0.264083	0.0774156
CGAGTA	9	0.273757	0.129378	0.562149	0.994449	0.655772
CGAGTG	8	0.128097	0.0425119	0.00209344	0.107371	0.0314914
CGATAC	8	0.078256	0.0594935	0.0167395	0.210283	0.068247
CGATAG	9	0.0851243	0.0742368	0.0440758	0.327418	0.107785
CGATGA	9	0.243711	0.0990261	0.206867	0.58259	0.292259
CGATGC	8	0.0710245	0.054533	0.00994627	0.176678	0.0547392
CGATGG	9	0.285906	0.115576	0.391764	0.793591	0.4823
CGCAAC	9	0.199401	0.0802767	0.0696638	0.382863	0.140116
CGCAAG	8	0.165253	0.0768358	0.0695778	0.350745	0.140116
CGCAAT	9	0.120104	0.0834843	0.0867729	0.41407	0.159
CGCACA	1	0.227397	0	1	NaN	1
CGCACC	1	0.27137	0	1	NaN	1
CGCAGA	9	0.265585	0.0725049	0.03821	0.31232	0.101009
CGCAGC	9	0.203535	0.112957	0.359974	0.758042	0.449469
CGCATT	9	0.232452	0.0681632	0.0260548	0.276035	0.0826403
CGCCAA	9	0.337043	0.131386	0.586209	1.02556	0.680072
CGCCAC	8	0.132099	0.0552846	0.0108051	0.181582	0.056794
CGCCAT	8	0.253885	0.0851629	0.116514	0.430889	0.193373
CGCCCA	8	0.211539	0.0720159	0.0493562	0.308121	0.114548
CGCCTA	1	0.152537	0	1	NaN	1
CGCCTG	9	0.175551	0.0750439	0.0470231	0.334576	0.111816
CGCCTT	1	0.114294	0	1	NaN	1
CGCTAC	9	0.115461	0.0860637	0.102415	0.440053	0.178943
CGCTCA	8	0.280751	0.120811	0.468363	0.867116	0.562644
CGCTCT	9	0.235387	0.0861184	0.102765	0.440612	0.179157
CGCTGA	9	0.16446	0.0620594	0.0142295	0.228813	0.0639416
CGCTGG	9	0.113352	0.0538576	0.00545723	0.172329	0.0428307
CGCTGT	9	0.239091	0.0710845	0.0338467	0.300202	0.0938734
CGCTTA	9	0.140362	0.0986316	0.203076	0.577958	0.289102
CGCTTC	9	0.25425	0.113141	0.362189	0.760515	0.451521
CGGAAA	9	0.220346	0.153608	0.810101	1.40182	0.910067
CGGAAG	9	0.205068	0.0831336	0.0847773	0.410599	0.156249
CGGAAT	9	0.204025	0.09322	0.154827	0.516277	0.23503
CGGACA	9	0.41095	0.0801791	0.0691828	0.381933	0.139639
CGGACT	9	0.274274	0.106988	0.290369	0.680046	0.377845
CGGAGA	9	0.36939	0.0971903	0.189533	0.56119	0.274523
CGGAGC	8	0.184293	0.0537037	0.00906182	0.171345	0.0526218
CGGAGG	9	0.159144	0.0906574	0.134534	0.488283	0.21335
CGGATA	9	0.256879	0.0914405	0.140556	0.496755	0.220028
CGGATC	9	0.37143	0.11436	0.376927	0.776979	0.46713
CGGATG	9	0.156965	0.0610728	0.0128002	0.221595	0.0607383
CGGATT	7	0.208813	0.099873	0.263445	0.592598	0.351594
CGGCAA	1	-0.0109238	0	1	NaN	1
CGGCAC	9	0.266058	0.0756608	0.0493702	0.3401	0.114548
CGGCAG	9	0.127056	0.0682223	0.0261976	0.276514	0.0826403
CGGCAT	9	0.249934	0.0646088	0.0185058	0.247997	0.0711952
CGGCCA	1	-0.0253582	0	1	NaN	1
CGGCCT	9	0.124822	0.0759833	0.0506301	0.343005	0.116198
CGGCGA	8	0.301357	0.0743949	0.0587334	0.328814	0.12743
CGGCTC	9	0.0793579	0.0717654	0.0358894	0.305981	0.0971505
CGGCTG	9	0.168621	0.0591596	0.0103526	0.207929	0.055851
CGGGAA	9	0.243521	0.095237	0.171971	0.538859	0.256133
CGGGAC	9	0.230712	0.0620956	0.0142842	0.22908	0.0639422
CGGGAG	9	0.225831	0.0691768	0.0285858	0.284306	0.0858581
CGGGCA	9	0.347581	0.0455155	0.00165697	0.123079	0.0282938
CGGGCG	8	0.100106	0.118984	0.44706	0.841093	0.542181
CGGGCT	1	7.53798e-05	0	1	NaN	1
CGGTAA	9	0.256204	0.0959315	0.17811	0.546748	0.26258
CGGTAG	8	0.122615	0.0696688	0.0412001	0.288364	0.103955
CGGTCA	1	0.223203	0	1	NaN	1
CGGTCT	5	0.0874723	0.0271976	0.00364383	0.0439466	0.0374946
CGGTGA	7	0.276013	0.148141	0.748585	1.30381	0.844565
CGGTGC	9	0.121086	0.0428547	0.00106938	0.109109	0.0271448
CGGTGG	9	0.27681	0.122265	0.47463	0.888118	0.568974
CGGTTG	1	0.1824	0	1	NaN	1
CGTACC	1	0.110729	0	1	NaN	1
CGTAGC	1	0.108127	0	1	NaN	1
CGTAGG	8	0.0747471	0.0983356	0.222707	0.574495	0.309109
CGTATC	9	0.295731	0.0843323	0.0917272	0.422525	0.164921
CGTATG	1	-0.179572	0	1	NaN	1
CGTCAA	9	0.175001	0.0873375	0.110772	0.453175	0.187211
CGTCAC	9	0.319121	0.200537	0.98571	2.3892	1
CGTCAG	9	0.106401	0.0477357	0.00233344	0.135379	0.0318266
CGTCAT	9	0.0540829	0.037438	0.000393635	0.0832703	0.0244637
CGTCCA	9	0.267941	0.15652	0.832118	1.45548	0.93248
CGTCCC	8	0.0931865	0.0499345	0.0057914	0.148138	0.0439114
CGTCCT	9	0.18835	0.0728637	0.0393751	0.315419	0.102375
CGTCGT	8	0.0870924	0.0427943	0.00218435	0.108802	0.0316865
CGTCTC	9	0.213279	0.103853	0.255997	0.640768	0.343979
CGTGAA	1	0.159189	0	1	NaN	1
CGTGAC	9	0.238789	0.0804724	0.0706348	0.384732	0.140969
CGTGAG	7	0.0524916	0.0592811	0.0258022	0.208784	0.0821664
CGTGAT	9	0.174237	0.0571819	0.00822947	0.194259	0.0507859
CGTGCA	1	0.123556	0	1	NaN	1
CGTGCC	1	-0.18802	0	1	NaN	1
CGTGGA	9	0.290318	0.110173	0.326921	0.721133	0.415424
CGTGGT	7	0.0544583	0.0696783	0.057276	0.288442	0.125475
CGTGTA	9	0.175719	0.0647316	0.0187345	0.248941	0.0714273
CGTGTC	8	0.0503873	0.0612044	0.0197653	0.222551	0.0729178
CGTGTG	9	0.127326	0.0457343	0.00171536	0.124265	0.0287167
CGTGTT	7	0.131563	0.0784611	0.0990326	0.36574	0.174871
CGTTCA	8	0.18315	0.134752	0.626171	1.07879	0.716811
CGTTCC	9	0.131506	0.0412925	0.000814359	0.101299	0.0252212
CGTTGC	8	0.0560373	0.0587327	0.0155145	0.204939	0.0658382
CGTTGT	9	0.247014	0.0602097	0.011645	0.215376	0.0582306
CGTTTC	7	0.0520892	0.0485306	0.00903055	0.139925	0.0526218
CGTTTG	6	0.141919	0.126332	0.551668	0.948182	0.646649
CTAAAC	9	0.377614	0.105009	0.26847	0.655121	0.35638
CTAAAG	9	0.165384	0.060363	0.011844	0.216474	0.0584283
CTAACA	8	0.286733	0.0903891	0.15408	0.485396	0.23457
CTAACG	9	0.0649494	0.0650561	0.0193493	0.251444	0.0720808
CTAACT	9	0.273523	0.109183	0.315397	0.708228	0.404517
CTAAGA	9	0.122605	0.0454209	0.00163224	0.122568	0.0281761
CTAAGC	9	0.294473	0.105583	0.274749	0.662299	0.362522
CTAAGT	9	0.269517	0.088934	0.121841	0.469894	0.199118
CTAATC	9	0.114602	0.0666123	0.0225167	0.263617	0.0772317
CTAATG	1	0.0695152	0	1	NaN	1
CTACAA	9	0.312168	0.0572058	0.00825286	0.194422	0.0508203
CTACAC	9	0.0990383	0.0477267	0.00233029	0.135328	0.0318266
CTACAG	9	0.122204	0.0706737	0.0326572	0.296743	0.0921931
CTACAT	9	0.325173	0.099171	0.208268	0.584297	0.293845
CTACCA	9	0.291387	0.059265	0.0104769	0.208671	0.056001
CTACCG	9	0.172022	0.0714597	0.0349613	0.30338	0.0956027
CTACCT	9	0.239614	0.0830436	0.0842701	0.40971	0.15586
CTACGA	9	0.335035	0.105836	0.277533	0.665473	0.365176
CTACGT	1	0.233524	0	1	NaN	1
CTACTC	9	0.270244	0.0662305	0.0217053	0.260604	0.0760167
CTACTG	1	0.117059	0	1	NaN	1
CTACTT	9	0.294859	0.0745327	0.0451401	0.330033	0.109103
CTAGAC	8	0.284087	0.129713	0.570811	0.999616	0.664404
CTAGAG	8	0.0233618	0.076502	0.0680198	0.347705	0.138594
CTAGCA	9	0.298197	0.061347	0.0131855	0.223589	0.0614349
CTAGCC	2	0.171627	0.0898535	0.511417	0.479661	0.60616
CTAGCT	1	0.170366	0	1	NaN	1
CTAGGA	1	0.197816	0	1	NaN	1
CTAGGT	8	0.310157	0.141388	0.694195	1.18765	0.787702
CTAGTA	8	0.224899	0.102852	0.267205	0.628478	0.355411
CTAGTC	8	0.212041	0.120565	0.465497	0.863592	0.560406
CTAGTG	1	0.0974025	0	1	NaN	1
CTAGTT	1	0.0616832	0	1	NaN	1
CTATAA	9	0.119212	0.0713362	0.0345915	0.302332	0.0950214
CTATAC	1	0.229475	0	1	NaN	1
CTATCA	9	0.181016	0.116226	0.399746	0.802552	0.490787
CTATCC	6	0.208386	0.0734031	0.0988197	0.320105	0.174871
CTATCG	9	0.0818187	0.0682645	0.0263	0.276857	0.0826714
CTATGA	9	0.372217	0.0512624	0.00386719	0.156121	0.0384168
CTATGC	9	0.227654	0.0698093	0.0302563	0.289528	0.0882783
CTATGG	9	0.22392	0.0687531	0.0275061	0.280833	0.084298
CTATGT	9	0.266194	0.048184	0.00249452	0.137933	0.032697
CTATTC	9	0.321702	0.0744481	0.044834	0.329285	0.108779
CTATTG	9	0.2584	0.0484488	0.00259391	0.139454	0.0330919
CTCAAA	9	0.285646	0.0683959	0.0266203	0.277923	0.0830186
CTCAAC	9	0.309489	0.0433297	0.00115904	0.111541	0.0271448
CTCAAG	9	0.171343	0.0813005	0.0748479	0.392691	0.145561
CTCAAT	9	0.190677	0.0966225	0.184333	0.554652	0.269088
CTCACA	9	0.508365	0.0823818	0.0806034	0.403206	0.151969
CTCACC	1	0.112369	0	1	NaN	1
CTCACT	1	-0.0394668	0	1	NaN	1
CTCAGA	9	0.407689	0.0647352	0.0187412	0.248969	0.0714273
CTCAGC	9	0.480735	0.0739137	0.0429345	0.324574	0.106293
CTCAGG	8	0.11921	0.0546522	0.0100787	0.177451	0.0551797
CTCAGT	9	0.279874	0.0803855	0.0702025	0.383902	0.140717
CTCATA	9	0.305271	0.0903547	0.132249	0.485027	0.210784
CTCATC	9	0.291336	0.116999	0.409252	0.813252	0.501096
CTCATG	8	0.168903	0.102388	0.262475	0.622823	0.350595
CTCATT	1	0.0190797	0	1	NaN	1
CTCCAA	9	0.336566	0.112005	0.348565	0.74531	0.437299
CTCCAC	9	0.216269	0.0787912	0.0625915	0.368824	0.13217
CTCCAG	9	0.306034	0.0779749	0.0589275	0.361221	0.127722
CTCCAT	9	0.320502	0.0763287	0.052005	0.34613	0.11819
CTCCCA	9	0.392871	0.0675323	0.024568	0.270949	0.0797639
CTCCGA	8	0.241981	0.134528	0.623769	1.07521	0.714721
CTCCGG	2	0.0643656	0.0298326	0.181863	0.0528746	0.26684
CTCCGT	9	0.20758	0.109072	0.314112	0.706786	0.403202
CTCCTA	9	0.311976	0.0560519	0.00718304	0.186658	0.0492217
CTCCTC	9	0.327696	0.0769653	0.0546092	0.351928	0.122059
CTCCTG	9	0.274904	0.0901463	0.130689	0.482792	0.208838
CTCCTT	9	0.191191	0.0620422	0.0142034	0.228685	0.0639416
CTCGAA	9	0.259438	0.105431	0.273077	0.66039	0.360797
CTCGAT	9	0.15495	0.08825	0.117017	0.462694	0.193944
CTCGCA	1	0.234855	0	1	NaN	1
CTCGCT	9	0.200684	0.146485	0.74858	1.27483	0.844565
CTCGGA	1	0.126058	0	1	NaN	1
CTCGGC	9	0.106918	0.052303	0.00445158	0.162524	0.0406432
CTCGGG	9	0.180681	0.109366	0.317521	0.710608	0.406586
CTCGGT	7	0.112128	0.044103	0.00536751	0.115558	0.0425513
CTCGTA	9	0.137684	0.103756	0.254965	0.639574	0.343176
CTCGTC	1	-0.0217399	0	1	NaN	1
CTCGTG	8	0.0859352	0.0684726	0.0374413	0.278547	0.0996437
CTCGTT	9	0.170987	0.0767522	0.0537275	0.349982	0.120543
CTCTAA	9	0.278619	0.0708209	0.0330797	0.29798	0.0931362
CTCTAC	9	0.383434	0.073317	0.0408839	0.319355	0.103624
CTCTAG	9	0.0972197	0.0433414	0.00116134	0.111602	0.0271448
CTCTAT	9	0.0326024	0.120329	0.450542	0.860216	0.54552
CTCTCA	9	0.387654	0.0967882	0.185843	0.556557	0.270792
CTCTCT	9	0.260361	0.066301	0.0218535	0.261159	0.0762292
CTCTGA	9	0.326675	0.0887367	0.120437	0.467812	0.197539
CTCTGC	8	0.264598	0.0779105	0.0747593	0.360625	0.145511
CTCTGG	9	0.263731	0.0482988	0.00253723	0.138592	0.0328488
CTCTGT	9	0.161129	0.0997706	0.214118	0.591384	0.299424
CTCTTA	9	0.305032	0.0877188	0.113355	0.45714	0.190068
CTCTTC	9	0.201383	0.0505881	0.00352322	0.152041	0.0366114
CTCTTG	9	0.173537	0.04308	0.00111117	0.11026	0.0271448
CTCTTT	9	0.216216	0.0406372	0.000723786	0.0981097	0.0245854
CTGAAA	7	0.21721	0.102617	0.290032	0.625611	0.377664
CTGAAC	9	0.174681	0.044848	0.00148896	0.119495	0.0275167
CTGAAG	9	0.207724	0.0414938	0.000844027	0.10229	0.0254611
CTGAAT	9	0.202124	0.0604004	0.0118928	0.216742	0.0584283
CTGACA	9	0.467409	0.0434726	0.00118723	0.112278	0.0271448
CTGACC	9	0.322565	0.125446	0.514081	0.934929	0.608689
CTGACT	9	0.307349	0.110321	0.328654	0.723071	0.417191
CTGAGA	9	0.279478	0.0816032	0.0764298	0.39562	0.147693
CTGAGC	9	0.426678	0.100874	0.225088	0.604534	0.311729
CTGAGG	9	0.158639	0.0748335	0.0462414	0.332703	0.110916
CTGAGT	9	0.180555	0.0755549	0.0489612	0.339148	0.114234
CTGATA	8	0.139973	0.0845781	0.1127	0.424991	0.189171
CTGATC	9	0.169571	0.0607875	0.0124088	0.21953	0.0599379
CTGATG	9	0.164334	0.0929165	0.152335	0.51292	0.232791
CTGATT	9	0.247498	0.0450736	0.00154407	0.1207	0.0280213
CTGCAA	9	0.307082	0.0555384	0.00674431	0.183253	0.047877
CTGCAC	9	0.329643	0.111343	0.340699	0.736528	0.429476
CTGCAG	1	0.107207	0	1	NaN	1
CTGCAT	9	0.275354	0.0784673	0.0611189	0.365798	0.13028
CTGCCA	9	0.49837	0.0739794	0.0431648	0.325151	0.106561
CTGCCG	8	0.14423	0.0481155	0.00459452	0.137541	0.0408447
CTGCCT	9	0.441229	0.0731461	0.0403102	0.317868	0.102776
CTGCGA	9	0.219348	0.102603	0.242805	0.625433	0.33047
CTGCGG	9	0.182164	0.0562631	0.00736994	0.188066	0.049641
CTGCGT	6	0.248219	0.0715338	0.0892602	0.304009	0.162151
CTGCTA	7	0.18016	0.0772959	0.0926207	0.354958	0.166008
CTGCTC	9	0.22803	0.066733	0.0227782	0.264573	0.0774473
CTGCTG	9	0.164676	0.0541738	0.00568275	0.174359	0.0435209
CTGCTT	9	0.18405	0.0905254	0.133535	0.486861	0.212298
CTGGAA	9	0.259966	0.082674	0.082209	0.406072	0.153713
CTGGAC	9	0.365176	0.0541129	0.00563874	0.173967	0.0434458
CTGGAG	9	0.247343	0.0873449	0.110821	0.453252	0.187211
CTGGAT	9	0.318706	0.0746051	0.0454034	0.330675	0.109405
CTGGCA	9	0.480067	0.0980387	0.197446	0.57103	0.283154
CTGGCC	9	0.367478	0.12157	0.465978	0.878046	0.560772
CTGGCG	7	0.133832	0.0617881	0.0318103	0.226816	0.090708
CTGGCT	9	0.273131	0.104292	0.2607	0.646195	0.348746
CTGGGA	9	0.286124	0.061187	0.0129596	0.222425	0.0609587
CTGGTA	8	0.0769979	0.11507	0.401614	0.786668	0.492699
CTGGTC	9	0.228076	0.0781292	0.0596082	0.362653	0.128243
CTGGTG	9	0.3383	0.0694964	0.029421	0.286939	0.0874326
CTGGTT	9	0.455013	0.0888518	0.121254	0.469025	0.198468
CTGTAA	9	0.27171	0.103035	0.247328	0.630711	0.334895
CTGTAC	9	0.176462	0.0688735	0.0278099	0.281818	0.0847169
CTGTAT	9	0.282962	0.0675717	0.0246589	0.271265	0.0798806
CTGTCA	9	0.429936	0.0704275	0.0319595	0.294679	0.0907934
CTGTCC	9	0.349213	0.0493112	0.00294057	0.144462	0.0340266
CTGTCT	1	0.29014	0	1	NaN	1
CTGTGA	9	0.265509	0.0528435	0.00478247	0.165901	0.0410868
CTGTGC	8	0.277583	0.09368	0.180886	0.521385	0.265776
CTGTGG	9	0.216949	0.0709618	0.033488	0.299167	0.0938282
CTGTGT	9	0.268361	0.069864	0.0304042	0.289982	0.0882783
CTGTTA	1	0.199472	0	1	NaN	1
CTGTTC	9	0.330259	0.0668177	0.0229629	0.265245	0.0774998
CTGTTG	9	0.108247	0.0564432	0.0075325	0.189273	0.049647
CTGTTT	9	0.183287	0.0254502	2.06949e-05	0.0384809	0.00544794
CTTAAA	9	0.150353	0.0382708	0.00046386	0.0870162	0.0244637
CTTACA	9	0.409816	0.0444709	0.0014005	0.117494	0.0275167
CTTACC	9	0.331203	0.0850236	0.0959022	0.429481	0.170775
CTTACT	9	0.175322	0.103612	0.253431	0.637799	0.34184
CTTAGA	9	0.268855	0.0927075	0.150633	0.510615	0.231124
CTTAGC	8	0.182601	0.0774387	0.0724537	0.356271	0.143679
CTTAGG	9	0.14834	0.0605217	0.0120527	0.217614	0.0587568
CTTAGT	9	0.0802229	0.0809092	0.0728362	0.38892	0.143806
CTTATC	9	0.177101	0.0696716	0.0298866	0.288387	0.0882275
CTTATG	9	0.233717	0.0947408	0.167659	0.533259	0.251728
CTTCAA	9	0.256426	0.0584919	0.00959198	0.203262	0.0533606
CTTCAC	9	0.186319	0.0599186	0.0112745	0.213298	0.0573816
CTTCAG	9	0.276892	0.056022	0.00715683	0.186458	0.0492217
CTTCAT	9	0.296296	0.0604754	0.0119914	0.217281	0.0586393
CTTCCA	9	0.331501	0.134538	0.623068	1.07536	0.714436
CTTCCC	9	0.316299	0.123461	0.489493	0.905574	0.583293
CTTCCG	9	0.112206	0.0540168	0.00556983	0.173349	0.043311
CTTCCT	9	0.328295	0.0887242	0.120348	0.46768	0.197496
CTTCGA	8	0.149216	0.0602295	0.0179941	0.215518	0.0699211
CTTCGC	7	0.0573678	0.0743168	0.0774566	0.328124	0.148926
CTTCGG	1	0.144731	0	1	NaN	1
CTTCGT	9	0.0959571	0.0468915	0.00205343	0.130633	0.0310775
CTTCTA	9	0.202192	0.0730435	0.0399686	0.316977	0.102776
CTTCTC	9	0.294634	0.0764868	0.0526433	0.347566	0.119297
CTTCTG	9	0.201213	0.0587299	0.00985776	0.204919	0.054537
CTTCTT	9	0.190375	0.0687616	0.0275274	0.280903	0.084298
CTTGAA	9	0.185315	0.085631	0.0996716	0.435639	0.175509
CTTGAC	9	0.252375	0.115925	0.396043	0.798393	0.487189
CTTGAG	1	0.00813152	0	1	NaN	1
CTTGAT	1	0.137831	0	1	NaN	1
CTTGCA	9	0.37456	0.0782655	0.0602142	0.363919	0.129136
CTTGCC	7	0.25893	0.119526	0.467991	0.848764	0.562551
CTTGCT	9	0.26045	0.0574304	0.00847522	0.195951	0.051487
CTTGGA	9	0.286813	0.0794294	0.0655651	0.374823	0.135275
CTTGGC	9	0.196005	0.08899	0.122241	0.470486	0.199463
CTTGGG	9	0.154215	0.0631708	0.0159863	0.237081	0.0671554
CTTGGT	9	0.108899	0.0236389	1.16589e-05	0.0331984	0.00460382
CTTGTA	8	0.216134	0.0480929	0.00458104	0.137413	0.0408447
CTTGTC	8	0.0953326	0.0841702	0.110087	0.420902	0.186469
CTTGTG	9	0.209866	0.0524052	0.00451266	0.16316	0.0408447
CTTGTT	9	0.335279	0.0615293	0.0134466	0.22492	0.0624856
CTTTAA	1	0.22419	0	1	NaN	1
CTTTAC	7	0.0800528	0.0711842	0.0633806	0.301045	0.133001
CTTTAG	9	0.161018	0.0576788	0.00872667	0.19765	0.0521125
CTTTAT	9	0.135492	0.0883131	0.117457	0.463355	0.194347
CTTTCA	9	0.187866	0.100623	0.222575	0.601537	0.309061
CTTTCC	9	0.248709	0.0738463	0.0426993	0.323983	0.10596
CTTTCG	1	0.0484738	0	1	NaN	1
CTTTCT	9	0.140541	0.0641789	0.0177225	0.244709	0.0694142
CTTTGA	9	0.224291	0.0890868	0.122935	0.47151	0.200388
CTTTGC	9	0.218792	0.0709728	0.0335202	0.29926	0.0938282
CTTTGG	9	0.115941	0.0523643	0.00448815	0.162905	0.0407824
CTTTGT	9	0.282553	0.076529	0.0528149	0.34795	0.1196
GAAACA	9	0.417254	0.0504857	0.00347324	0.151426	0.0366114
GAAACC	9	0.362086	0.0754859	0.0486964	0.338529	0.11395
GAAACG	9	0.146218	0.0659921	0.0212099	0.258731	0.0752514
GAAACT	9	0.460392	0.0591376	0.0103268	0.207774	0.055851
GAAAGA	9	0.410154	0.0565632	0.00764239	0.190078	0.0497081
GAAAGC	9	0.294965	0.0900967	0.130319	0.482261	0.208551
GAAAGG	9	0.355236	0.0564416	0.00753106	0.189262	0.049647
GAAAGT	9	0.330199	0.0636939	0.0168698	0.241024	0.068247
GAAATA	9	0.29274	0.0983595	0.200483	0.574774	0.286313
GAAATC	9	0.344278	0.0673543	0.0241604	0.269523	0.0790921
GAAATG	9	0.30249	0.0768391	0.0540857	0.350775	0.121261
GAAATT	1	0.195916	0	1	NaN	1
GAACAA	9	0.342543	0.0981468	0.198467	0.572291	0.283948
GAACAC	9	0.274532	0.0992458	0.208993	0.585178	0.294277
GAACAG	9	0.262341	0.077553	0.0570945	0.357323	0.125373
GAACAT	9	0.347155	0.0731092	0.0401872	0.317548	0.102776
GAACCA	9	0.304864	0.12003	0.446824	0.855947	0.542181
GAACCC	9	0.248219	0.135062	0.629071	1.08376	0.719231
GAACCG	9	0.0385226	0.0602871	0.011745	0.21593	0.0582458
GAACCT	9	0.31479	0.0611555	0.0129155	0.222196	0.0609587
GAACGA	9	0.363823	0.129736	0.566478	0.999974	0.660333
GAACGG	9	0.307086	0.142443	0.709004	1.20544	0.803671
GAACGT	9	0.263937	0.0649855	0.0192142	0.250898	0.0720018
GAACTA	9	0.328555	0.0667942	0.0229115	0.265058	0.077492
GAACTC	9	0.365939	0.0816054	0.0764415	0.395642	0.147693
GAACTG	9	0.227351	0.0529009	0.00481872	0.166261	0.041253
GAACTT	9	0.345337	0.0807064	0.0718083	0.386973	0.142578
GAAGAA	9	0.483783	0.0655781	0.0203707	0.255495	0.0740517
GAAGAC	9	0.261842	0.109623	0.320508	0.713956	0.409144
GAAGAG	9	0.33222	0.0699502	0.0306384	0.290698	0.0887715
GAAGAT	9	0.414041	0.0837917	0.0885478	0.417125	0.161409
GAAGCA	9	0.466756	0.0774509	0.0566572	0.356383	0.124899
GAAGCC	9	0.306325	0.0439045	0.00127588	0.11452	0.0275167
GAAGCG	9	0.294718	0.0736474	0.0420103	0.32224	0.105018
GAAGCT	9	0.341998	0.0576738	0.00872163	0.197616	0.0521125
GAAGGA	9	0.437115	0.0780464	0.0592422	0.361884	0.1278
GAAGGC	9	0.196019	0.118289	0.425206	0.831293	0.51822
GAAGGG	9	0.0868758	0.047693	0.00231855	0.135137	0.0318266
GAAGGT	9	0.329793	0.0974231	0.191688	0.563882	0.277009
GAAGTA	7	0.182357	0.12017	0.474965	0.857942	0.568985
GAAGTC	9	0.481787	0.0794375	0.0656036	0.3749	0.135275
GAAGTG	8	0.146408	0.111501	0.360809	0.738615	0.45018
GAAGTT	9	0.40942	0.0822045	0.0796395	0.401472	0.150935
GAATAA	9	0.307985	0.0704235	0.0319482	0.294646	0.0907934
GAATAC	9	0.292158	0.0653083	0.0198376	0.253396	0.0729178
GAATAG	9	0.185522	0.113863	0.370908	0.770251	0.460392
GAATAT	9	0.261583	0.0864748	0.105066	0.444267	0.181865
GAATCA	9	0.202827	0.0756548	0.0493471	0.340046	0.114548
GAATCC	9	0.0883963	0.0472926	0.00218278	0.132877	0.0316865
GAATCT	9	0.304643	0.0868787	0.107713	0.448426	0.184326
GAATGA	9	0.399732	0.0635619	0.0166434	0.240026	0.068247
GAATGC	9	0.126594	0.0446386	0.00143927	0.118382	0.0275167
GAATGG	9	0.248645	0.0797735	0.0672089	0.378078	0.137331
GAATGT	9	0.267271	0.0371694	0.000373006	0.0820798	0.0244637
GAATTA	8	0.163135	0.0515178	0.00702508	0.157681	0.048988
GAATTG	9	0.29755	0.0621237	0.0143267	0.229287	0.0639422
GACAAA	9	0.392134	0.0910712	0.137696	0.492749	0.216949
GACAAC	9	0.431308	0.064905	0.019061	0.250276	0.0716804
GACAAG	9	0.22574	0.0796256	0.0664989	0.376677	0.136498
GACAAT	9	0.338812	0.0929443	0.152563	0.513228	0.232937
GACACA	9	0.322022	0.13441	0.621597	1.07332	0.713521
GACACC	2	0.126962	0.0476669	0.286683	0.134989	0.374073
GACACG	1	0.107237	0	1	NaN	1
GACACT	9	0.253886	0.0993045	0.209563	0.585871	0.294882
GACAGA	9	0.416473	0.0717003	0.0356901	0.305426	0.0966939
GACAGC	8	0.283658	0.14722	0.748264	1.28765	0.844565
GACAGG	9	0.133328	0.0849737	0.0955965	0.428976	0.170519
GACAGT	9	0.290243	0.0897069	0.127438	0.478097	0.205501
GACATA	9	0.343244	0.116917	0.408245	0.812117	0.500057
GACATC	9	0.274031	0.110702	0.333132	0.728077	0.421489
GACATG	9	0.113635	0.0837873	0.0885221	0.417081	0.161409
GACATT	1	0.226822	0	1	NaN	1
GACCAA	9	0.336431	0.101317	0.229574	0.609863	0.316554
GACCAC	8	0.25788	0.129771	0.57146	1.00051	0.664823
GACCAG	9	0.256877	0.0753526	0.0481873	0.337335	0.113262
GACCAT	9	0.397504	0.0817037	0.0769599	0.396595	0.148326
GACCCA	8	0.261699	0.0487332	0.00497625	0.141096	0.0415304
GACCCG	7	0.12908	0.050414	0.0110751	0.150996	0.0570785
GACCCT	9	0.208671	0.0676353	0.0248062	0.271776	0.0798806
GACCGA	9	0.350026	0.1231	0.485013	0.900292	0.578609
GACCGG	1	-0.0512143	0	1	NaN	1
GACCGT	1	-0.0414993	0	1	NaN	1
GACCTA	9	0.269758	0.0505352	0.00349733	0.151723	0.0366114
GACCTC	9	0.287246	0.0615885	0.0135324	0.225353	0.0625404
GACCTG	9	0.187653	0.0366483	0.000335582	0.0797943	0.0244637
GACCTT	9	0.327404	0.102632	0.243111	0.62579	0.330632
GACGAA	9	0.24948	0.10314	0.248433	0.631997	0.336037
GACGAC	7	0.152363	0.048887	0.00939302	0.141988	0.0530815
GACGAG	2	0.099932	0.0512397	0.307115	0.155983	0.395828
GACGAT	8	0.17844	0.123784	0.502961	0.910319	0.598214
GACGCA	9	0.394921	0.106419	0.283995	0.672821	0.371333
GACGCT	9	0.134334	0.0545809	0.00598416	0.176989	0.0452248
GACGGA	9	0.221737	0.0723288	0.0376477	0.310804	0.0999403
GACGGT	9	0.173436	0.0626923	0.0152102	0.233503	0.0651956
GACGTC	1	0.0187424	0	1	NaN	1
GACGTG	9	0.225125	0.0639348	0.0172892	0.24285	0.0689671
GACTAC	9	0.165644	0.0926117	0.149857	0.509561	0.230477
GACTAG	8	0.136346	0.0859838	0.122	0.439236	0.199275
GACTAT	1	0.00666031	0	1	NaN	1
GACTCA	1	0.202984	0	1	NaN	1
GACTCC	9	0.413764	0.114862	0.383049	0.783828	0.473744
GACTCT	9	0.178285	0.075448	0.0485513	0.33819	0.113779
GACTGA	9	0.339368	0.0951189	0.17094	0.537524	0.2557
GACTGC	9	0.324061	0.0697864	0.0301948	0.289339	0.0882783
GACTGG	9	0.339969	0.155733	0.826345	1.44087	0.926997
GACTGT	9	0.367349	0.0917306	0.142827	0.499911	0.22259
GACTTA	9	0.119544	0.0581194	0.0091875	0.200681	0.0529916
GACTTC	9	0.389613	0.115811	0.394649	0.796828	0.485663
GACTTG	9	0.220584	0.0610672	0.0127924	0.221554	0.0607383
GACTTT	2	0.201258	0.0556946	0.33228	0.184285	0.421048
GAGAAA	9	0.135392	0.120356	0.450867	0.86059	0.545704
GAGAAC	9	0.299651	0.0879613	0.115018	0.459672	0.191737
GAGAAG	9	0.238151	0.0400547	0.000650549	0.0953173	0.0244637
GAGAAT	9	0.242521	0.05823	0.00930616	0.201446	0.0529916
GAGACA	9	0.353288	0.0376178	0.000407976	0.0840718	0.0244637
GAGACC	9	0.313878	0.0829126	0.0835355	0.408419	0.155407
GAGACG	1	0.0999899	0	1	NaN	1
GAGACT	9	0.229476	0.0762422	0.0516582	0.345346	0.117761
GAGAGA	9	0.366596	0.131902	0.592333	1.03364	0.685665
GAGAGC	9	0.275947	0.138728	0.669908	1.14338	0.762884
GAGAGG	8	0.117867	0.0778807	0.0746124	0.36035	0.145463
GAGAGT	9	0.242484	0.0968525	0.18643	0.557296	0.271148
GAGATA	9	0.231205	0.0731788	0.0404195	0.318152	0.102828
GAGATC	9	0.208874	0.0498064	0.0031563	0.147379	0.0349851
GAGATG	9	0.196815	0.0569342	0.00799026	0.19258	0.0500818
GAGATT	8	0.138571	0.109499	0.338374	0.712339	0.4272
GAGCAA	9	0.268261	0.0823861	0.0806269	0.403248	0.151969
GAGCAC	9	0.306413	0.0655255	0.020266	0.255085	0.0739206
GAGCAG	9	0.233943	0.0612637	0.0130675	0.222983	0.0611327
GAGCAT	8	0.337402	0.0689179	0.0388102	0.282182	0.101744
GAGCCA	9	0.338661	0.0744461	0.0448268	0.329267	0.108779
GAGCCC	1	0.18538	0	1	NaN	1
GAGCCG	7	0.24867	0.0718997	0.0664302	0.307127	0.136498
GAGCCT	9	0.341854	0.106157	0.281086	0.669517	0.368445
GAGCGA	9	0.348788	0.134314	0.620483	1.07178	0.712766
GAGCGC	1	0.0564964	0	1	NaN	1
GAGCTA	9	0.430444	0.120598	0.453882	0.86406	0.548094
GAGCTG	9	0.175903	0.089473	0.125728	0.475607	0.203574
GAGCTT	8	0.208584	0.034537	0.000539374	0.0708654	0.0244637
GAGGAA	9	0.428176	0.0709515	0.033458	0.29908	0.0938282
GAGGAC	7	0.336264	0.154924	0.7998	1.42595	0.898815
GAGGAG	9	0.320816	0.0886927	0.120125	0.467347	0.197335
GAGGAT	9	0.387211	0.0868404	0.10746	0.448031	0.18426
GAGGCA	9	0.414973	0.0922194	0.146702	0.505253	0.227173
GAGGCC	9	0.381895	0.130162	0.571592	1.00654	0.664823
GAGGCT	9	0.303883	0.0588062	0.00994421	0.205452	0.0547392
GAGGGA	9	0.275311	0.0995061	0.211528	0.588253	0.296867
GAGGGC	9	0.193536	0.0886798	0.120034	0.467211	0.197335
GAGGGT	9	0.21596	0.0811235	0.0739333	0.390983	0.144706
GAGGTC	9	0.189884	0.110947	0.336013	0.731295	0.424586
GAGGTG	9	0.290775	0.0801873	0.0692229	0.38201	0.139639
GAGGTT	9	0.342142	0.0974154	0.191616	0.563793	0.277009
GAGTAA	9	0.250944	0.103375	0.250915	0.634881	0.33888
GAGTAC	9	0.351278	0.074651	0.045571	0.331082	0.109706
GAGTAG	9	0.149513	0.082734	0.0825411	0.406661	0.154
GAGTAT	9	0.256058	0.0485324	0.00262596	0.139935	0.0331895
GAGTCA	9	0.333582	0.115393	0.389524	0.79108	0.480291
GAGTCC	9	0.168815	0.0796017	0.0663846	0.376451	0.136498
GAGTCG	1	0.298203	0	1	NaN	1
GAGTCT	9	0.274677	0.0699575	0.0306584	0.290759	0.0887715
GAGTGA	9	0.289319	0.106542	0.285373	0.674385	0.372834
GAGTGC	9	0.241466	0.0860113	0.10208	0.439517	0.178555
GAGTGG	9	0.131064	0.0421483	0.000946833	0.105542	0.0264694
GAGTGT	9	0.338822	0.0594845	0.0107396	0.210219	0.0566386
GAGTTA	1	-0.0272625	0	1	NaN	1
GAGTTC	9	0.229604	0.0505731	0.00351584	0.151951	0.0366114
GAGTTG	9	0.204165	0.0801173	0.0688792	0.381344	0.13957
GAGTTT	9	0.198483	0.0648254	0.0189107	0.249664	0.0714823
GATAAA	1	0.0824976	0	1	NaN	1
GATAAC	9	0.159671	0.0522526	0.0044217	0.162211	0.0404873
GATAAG	8	0.205107	0.0871522	0.130076	0.451254	0.208266
GATAAT	8	0.229887	0.0889691	0.143256	0.470265	0.223149
GATACA	9	0.296511	0.0711507	0.0340413	0.300761	0.0941708
GATACC	9	0.201109	0.0950394	0.170247	0.536626	0.254887
GATACG	9	0.151461	0.0859125	0.10145	0.438507	0.177749
GATACT	8	0.109562	0.0408506	0.00161903	0.0991426	0.0281761
GATAGA	9	0.373431	0.127287	0.536723	0.962574	0.632207
GATAGC	7	0.236077	0.124485	0.521412	0.920658	0.616215
GATAGG	3	0.169346	0.0867977	0.360828	0.44759	0.45018
GATAGT	1	0.101577	0	1	NaN	1
GATATG	9	0.161978	0.0750255	0.0469543	0.334412	0.111816
GATATT	8	0.316801	0.172929	0.912858	1.77664	1
GATCAA	9	0.387854	0.0624644	0.0148511	0.231809	0.06471
GATCAC	9	0.361478	0.0927999	0.151385	0.511634	0.231922
GATCAG	8	0.0797273	0.0363385	0.00075438	0.078451	0.0248238
GATCAT	9	0.17058	0.0665339	0.0223483	0.262997	0.0769854
GATCCA	9	0.296874	0.0793076	0.0649901	0.373675	0.135093
GATCCC	9	0.223934	0.0923837	0.148019	0.507055	0.228539
GATCCG	9	0.208893	0.0728041	0.0391797	0.314902	0.102119
GATCCT	9	0.253093	0.117884	0.420188	0.825606	0.512302
GATCGA	1	0.10173	0	1	NaN	1
GATCGC	2	0.196925	0.0138572	0.0850584	0.0114081	0.156494
GATCGG	1	0.0543777	0	1	NaN	1
GATCGT	9	0.285466	0.0971467	0.189131	0.560687	0.274067
GATCTA	9	0.0740898	0.0760797	0.0510115	0.343876	0.116772
GATCTC	9	0.213209	0.0370717	0.000365731	0.0816488	0.0244637
GATCTG	7	0.111377	0.0847217	0.138158	0.426436	0.217351
GATCTT	9	0.345585	0.121855	0.469522	0.882164	0.563534
GATGAA	9	0.361563	0.0680811	0.0258576	0.27537	0.08226
GATGAC	9	0.227154	0.0744701	0.0449136	0.329479	0.108889
GATGAG	9	0.303396	0.0722331	0.0373447	0.309983	0.0995543
GATGAT	9	0.293167	0.104748	0.265627	0.65186	0.35384
GATGCA	9	0.319447	0.0633113	0.0162199	0.238137	0.0677761
GATGCC	9	0.410761	0.131139	0.583273	1.02171	0.677661
GATGCG	9	0.133554	0.0810093	0.0733473	0.389883	0.144349
GATGCT	9	0.376533	0.104345	0.261278	0.64686	0.349292
GATGGA	9	0.298851	0.0865202	0.105361	0.444733	0.182177
GATGGC	9	0.404722	0.127322	0.537146	0.963096	0.632207
GATGGG	1	0.130272	0	1	NaN	1
GATGGT	9	0.364049	0.0620552	0.0142231	0.228781	0.0639416
GATGTA	9	0.273878	0.106716	0.287316	0.676588	0.374589
GATGTC	9	0.19948	0.143848	0.723121	1.22933	0.819054
GATGTG	9	0.26837	0.0503609	0.00341315	0.150679	0.0364261
GATGTT	9	0.445491	0.0867397	0.106797	0.446992	0.18358
GATTAA	7	0.243219	0.138321	0.662156	1.13668	0.754328
GATTAC	9	0.136721	0.059794	0.0111189	0.212412	0.0570785
GATTAT	9	0.209154	0.0703068	0.0316212	0.293669	0.0903995
GATTCA	9	0.425968	0.0819068	0.0780392	0.39857	0.149436
GATTCC	9	0.189034	0.0392469	0.000559391	0.0915114	0.0244637
GATTCG	9	0.206661	0.0627264	0.0152645	0.233757	0.0652511
GATTCT	8	0.222102	0.0740271	0.0572082	0.325571	0.125413
GATTGA	9	0.269446	0.134862	0.626784	1.08055	0.717136
GATTGC	9	0.277772	0.132036	0.59391	1.03574	0.686987
GATTGG	9	0.290491	0.0917962	0.143343	0.500626	0.223175
GATTGT	9	0.269704	0.0664475	0.0221636	0.262314	0.0768793
GATTTA	9	0.167814	0.0616856	0.0136738	0.226064	0.0626101
GATTTC	9	0.32177	0.0647039	0.0186827	0.248728	0.0714273
GATTTG	9	0.187209	0.0755712	0.049024	0.339294	0.114234
GCAAAC	9	0.47244	0.127205	0.535711	0.961324	0.631695
GCAAAG	9	0.316147	0.0645018	0.0183084	0.247177	0.0707398
GCAAAT	2	0.202624	0.199829	0.876487	2.37236	0.979767
GCAACA	9	0.325192	0.139845	0.681922	1.16187	0.775447
GCAACC	7	0.146985	0.0832686	0.128376	0.411933	0.206592
GCAACG	9	0.246913	0.0854329	0.0984316	0.433625	0.174576
GCAACT	9	0.441087	0.0870565	0.108891	0.450263	0.185438
GCAAGA	9	0.351491	0.0726299	0.038613	0.313398	0.101744
GCAAGC	9	0.437167	0.090904	0.136413	0.490942	0.215572
GCAAGG	9	0.275112	0.0687455	0.0274871	0.280772	0.084298
GCAAGT	9	0.251969	0.0936545	0.158433	0.5211	0.239355
GCAATA	9	0.425948	0.128991	0.557478	0.98852	0.65125
GCAATC	9	0.307502	0.0932015	0.154674	0.516071	0.235008
GCAATG	9	0.492384	0.0750631	0.0470947	0.334747	0.111816
GCACAA	7	0.282902	0.106762	0.331849	0.677168	0.420671
GCACAC	9	0.41829	0.0967017	0.185053	0.555562	0.269891
GCACAG	9	0.484802	0.0697042	0.0299738	0.288657	0.0882453
GCACAT	9	0.333701	0.0720571	0.0367918	0.308473	0.0985656
GCACCA	6	0.325288	0.067272	0.0696989	0.268864	0.140116
GCACCT	8	0.202189	0.0945649	0.188492	0.531281	0.273448
GCACGA	9	0.233256	0.0523718	0.00449265	0.162952	0.0407824
GCACGG	9	0.137589	0.0809003	0.0727907	0.388834	0.143806
GCACGT	1	-0.0726808	0	1	NaN	1
GCACTA	9	0.482198	0.0825583	0.0815706	0.404936	0.15301
GCACTC	9	0.369584	0.110716	0.333296	0.728259	0.421489
GCACTG	9	0.347366	0.0819447	0.078242	0.398939	0.149436
GCACTT	7	0.211408	0.0663012	0.0450822	0.26116	0.109103
GCAGAA	9	0.460117	0.0674444	0.0243662	0.270244	0.0793533
GCAGAC	9	0.225175	0.0799148	0.0678922	0.379419	0.138458
GCAGAG	9	0.283137	0.115949	0.396338	0.798723	0.487361
GCAGAT	9	0.2778	0.106564	0.285618	0.674663	0.372838
GCAGCA	9	0.546028	0.0964097	0.182404	0.552212	0.26726
GCAGCC	9	0.48025	0.114687	0.38091	0.781434	0.47151
GCAGCG	1	0.0308245	0	1	NaN	1
GCAGCT	9	0.372513	0.0814634	0.0756964	0.394266	0.146702
GCAGGA	9	0.235366	0.0656956	0.0206063	0.256411	0.0743097
GCAGGC	8	0.074231	0.0990891	0.229877	0.583332	0.316833
GCAGGG	1	0.00504048	0	1	NaN	1
GCAGGT	9	0.386286	0.0837867	0.0885185	0.417075	0.161409
GCAGTA	9	0.44892	0.0854346	0.0984422	0.433643	0.174576
GCAGTC	9	0.366086	0.0589754	0.0101381	0.206636	0.055409
GCAGTG	9	0.344303	0.0820022	0.0785499	0.399499	0.149752
GCAGTT	9	0.375635	0.115418	0.389839	0.791432	0.480304
GCATAA	8	0.294562	0.1361	0.640477	1.10047	0.730564
GCATAG	9	0.230045	0.0735935	0.041825	0.321768	0.104701
GCATCA	9	0.341834	0.0499788	0.00323441	0.148401	0.0353088
GCATCC	9	0.370174	0.111963	0.34807	0.744757	0.43685
GCATCG	9	0.135029	0.0457444	0.00171809	0.12432	0.0287167
GCATCT	9	0.363152	0.0742484	0.0441173	0.327521	0.107785
GCATGA	9	0.326005	0.129822	0.567511	1.0013	0.66105
GCATGC	1	0.226209	0	1	NaN	1
GCATGG	9	0.408867	0.0899138	0.128962	0.480305	0.2072
GCATGT	9	0.247588	0.0504235	0.00344317	0.151053	0.0366114
GCATTA	9	0.393371	0.158628	0.846918	1.49495	0.948056
GCATTC	9	0.331399	0.0722487	0.0373938	0.310116	0.0996012
GCATTT	9	0.329019	0.105074	0.26917	0.655922	0.356972
GCCAAA	9	0.453423	0.0533976	0.00514214	0.169398	0.0419742
GCCAAC	9	0.360759	0.0807984	0.0722734	0.387856	0.143412
GCCAAG	9	0.435848	0.0590216	0.0101915	0.20696	0.0555086
GCCAAT	9	0.566755	0.122758	0.480758	0.895292	0.575489
GCCACA	9	0.332295	0.0486982	0.00269051	0.140893	0.0332005
GCCACC	9	0.335993	0.0568312	0.00789237	0.191884	0.0499639
GCCACG	7	0.148909	0.105777	0.321753	0.664732	0.410342
GCCACT	1	0.250428	0	1	NaN	1
GCCAGA	9	0.432304	0.0778126	0.0582176	0.359719	0.126831
GCCAGC	9	0.480981	0.117882	0.42016	0.825574	0.512302
GCCAGG	1	0.0488945	0	1	NaN	1
GCCAGT	9	0.384814	0.0775323	0.0570059	0.357133	0.125318
GCCATA	9	0.467329	0.157909	0.841972	1.48141	0.942853
GCCATC	9	0.326911	0.0828798	0.083352	0.408095	0.155253
GCCATG	9	0.290732	0.0563548	0.00745238	0.18868	0.049647
GCCATT	9	0.442969	0.11862	0.429305	0.835947	0.522611
GCCCAA	9	0.402216	0.0991309	0.207881	0.583825	0.293429
GCCCAC	9	0.321246	0.11494	0.383999	0.78489	0.474404
GCCCAG	9	0.300028	0.0980652	0.197696	0.571339	0.283358
GCCCAT	8	0.250718	0.164976	0.874641	1.61698	0.97805
GCCCTA	9	0.284023	0.105246	0.271055	0.658079	0.358869
GCCCTG	7	0.335282	0.127407	0.552431	0.964391	0.647261
GCCCTT	9	0.338499	0.0558795	0.00703323	0.185511	0.048988
GCCGAC	1	0.127034	0	1	NaN	1
GCCGAG	9	0.212877	0.0686526	0.0272546	0.280013	0.0841616
GCCGAT	1	0.304511	0	1	NaN	1
GCCGCA	2	0.31687	0.115406	0.626274	0.791266	0.716811
GCCGCC	1	-0.00503414	0	1	NaN	1
GCCGCT	2	0.27837	0.00512794	0.0315281	0.00156225	0.0903995
GCCGGA	1	0.102612	0	1	NaN	1
GCCGGT	1	-0.0018548	0	1	NaN	1
GCCGTG	9	0.189318	0.0964023	0.182337	0.552127	0.26726
GCCTAC	1	0.196388	0	1	NaN	1
GCCTAG	8	0.11718	0.0776931	0.0736907	0.358616	0.144417
GCCTAT	9	0.320646	0.0648869	0.0190268	0.250137	0.0716396
GCCTCA	9	0.374558	0.0935229	0.157336	0.519637	0.238152
GCCTCC	1	0.157778	0	1	NaN	1
GCCTCT	9	0.368262	0.100989	0.226254	0.605922	0.31307
GCCTGA	9	0.303198	0.0861966	0.103267	0.441412	0.179439
GCCTGC	7	0.196572	0.12472	0.52392	0.924132	0.618484
GCCTGG	9	0.274823	0.0888243	0.121059	0.468736	0.198251
GCCTGT	9	0.379978	0.0642329	0.0178194	0.245121	0.0694958
GCCTTA	9	0.401438	0.0776509	0.0575162	0.358226	0.125812
GCCTTC	9	0.431385	0.12891	0.556497	0.98728	0.650379
GCCTTG	9	0.416131	0.133884	0.615525	1.06494	0.708358
GCCTTT	9	0.336584	0.0771562	0.055408	0.353676	0.122917
GCGAAA	9	0.225562	0.0755576	0.0489719	0.339173	0.114234
GCGAAG	1	-0.0601166	0	1	NaN	1
GCGACA	1	0.0202064	0	1	NaN	1
GCGACC	1	0.227018	0	1	NaN	1
GCGACG	9	0.199143	0.11222	0.35113	0.748172	0.440166
GCGACT	1	0.0540057	0	1	NaN	1
GCGAGA	9	0.353709	0.129859	0.567956	1.00187	0.661324
GCGAGC	8	0.277671	0.0882998	0.138313	0.463216	0.217379
GCGAGG	8	0.0625066	0.0695778	0.0409049	0.287611	0.103624
GCGAGT	9	0.129843	0.0481493	0.00248174	0.137735	0.032697
GCGATC	6	0.176922	0.111989	0.410421	0.745103	0.501787
GCGATG	8	0.156106	0.0720131	0.0493458	0.308097	0.114548
GCGATT	9	0.232243	0.117104	0.410554	0.81472	0.501787
GCGCAC	1	0.00975285	0	1	NaN	1
GCGCAG	7	0.129532	0.0972789	0.23926	0.562213	0.327337
GCGCAT	9	0.277011	0.101028	0.226643	0.606384	0.31347
GCGCCT	8	0.218417	0.0743317	0.0584692	0.328256	0.127032
GCGCGT	8	0.269648	0.100779	0.246339	0.603401	0.334128
GCGCTA	9	0.268918	0.0650011	0.019244	0.251019	0.0720281
GCGCTT	9	0.314902	0.0774462	0.0566371	0.35634	0.124899
GCGGAA	3	0.340806	0.069546	0.249747	0.287348	0.337447
GCGGAC	1	0.0377374	0	1	NaN	1
GCGGAG	1	0.0572505	0	1	NaN	1
GCGGAT	1	0.100638	0	1	NaN	1
GCGGCT	9	0.288746	0.0992081	0.208628	0.584734	0.294081
GCGGGA	9	0.333949	0.115255	0.387838	0.78919	0.478586
GCGGTA	8	0.227041	0.107841	0.320097	0.690932	0.409055
GCGGTT	9	0.391906	0.170247	0.912137	1.72196	1
GCGTAA	8	0.147486	0.0580087	0.0144142	0.199917	0.0639527
GCGTAT	1	0.0889286	0	1	NaN	1
GCGTCA	3	0.168274	0.0736647	0.275582	0.322391	0.36334
GCGTCT	3	0.198606	0.116388	0.552805	0.804786	0.647261
GCGTGA	1	0.107019	0	1	NaN	1
GCGTTA	1	0.0736657	0	1	NaN	1
GCGTTC	9	0.238401	0.0955285	0.174533	0.542163	0.25885
GCGTTG	1	0.025825	0	1	NaN	1
GCGTTT	9	0.196164	0.0916517	0.142207	0.499051	0.222172
GCTAAA	9	0.337201	0.0951695	0.171381	0.538096	0.2557
GCTAAC	2	0.350743	0.178819	0.831879	1.89973	0.93248
GCTAAG	9	0.153813	0.0756652	0.0493872	0.340139	0.114548
GCTAAT	3	0.224792	0.16304	0.79385	1.57925	0.893082
GCTACA	9	0.437332	0.0590074	0.0101751	0.20686	0.0555086
GCTACC	8	0.103065	0.0861499	0.123129	0.440935	0.2006
GCTACG	9	0.256591	0.0573537	0.00839877	0.195428	0.0512223
GCTACT	9	0.417107	0.0579907	0.00905095	0.199794	0.0526218
GCTAGA	9	0.290585	0.0766763	0.0534159	0.349291	0.120339
GCTAGG	9	0.309012	0.121671	0.467241	0.879512	0.562077
GCTAGT	9	0.243292	0.109019	0.313501	0.706101	0.402581
GCTATA	1	0.178194	0	1	NaN	1
GCTATC	1	0.306306	0	1	NaN	1
GCTATG	9	0.323708	0.112295	0.352029	0.749175	0.441119
GCTCAA	9	0.318083	0.0849612	0.0955201	0.42885	0.170479
GCTCAC	9	0.405187	0.0916871	0.142485	0.499437	0.222312
GCTCAG	9	0.366553	0.0536649	0.00532336	0.171098	0.0425513
GCTCAT	9	0.270006	0.117392	0.414111	0.818734	0.505673
GCTCCA	9	0.284255	0.168568	0.904331	1.68816	1
GCTCCC	1	0.216154	0	1	NaN	1
GCTCCT	8	0.225574	0.108071	0.322608	0.693876	0.410935
GCTCGG	8	0.0980982	0.0719289	0.0490348	0.307377	0.114234
GCTCGT	1	0.122733	0	1	NaN	1
GCTCTA	8	0.124521	0.0884802	0.139635	0.465111	0.218953
GCTCTC	9	0.365549	0.0927143	0.150689	0.51069	0.231124
GCTCTG	8	0.13675	0.0785885	0.0781587	0.366929	0.149436
GCTCTT	9	0.35741	0.0747307	0.0458628	0.331789	0.110259
GCTGAA	9	0.375427	0.0737413	0.0423347	0.323062	0.105515
GCTGAC	9	0.255924	0.098647	0.203223	0.578139	0.289181
GCTGAG	9	0.290157	0.108922	0.312379	0.704842	0.401303
GCTGAT	9	0.382181	0.0726381	0.0386394	0.313468	0.101744
GCTGCA	9	0.29544	0.053394	0.00513972	0.169375	0.0419742
GCTGCC	8	0.309166	0.105903	0.299145	0.666322	0.387453
GCTGCT	9	0.384785	0.063255	0.0161261	0.237714	0.0675629
GCTGGA	9	0.411794	0.0669467	0.0232466	0.26627	0.0777924
GCTGGC	9	0.263596	0.0698417	0.030344	0.289797	0.0882783
GCTGGG	9	0.212134	0.0811974	0.0743141	0.391696	0.145092
GCTGGT	9	0.317624	0.0608431	0.0124843	0.219931	0.0602106
GCTGTA	9	0.296022	0.0953418	0.172891	0.540047	0.257017
GCTGTC	9	0.324652	0.0556761	0.00685977	0.184163	0.0483706
GCTGTG	9	0.264623	0.0887798	0.120743	0.468267	0.197836
GCTGTT	9	0.34536	0.0708984	0.0333038	0.298632	0.0936004
GCTTAC	9	0.261932	0.0875363	0.112114	0.45524	0.188587
GCTTAG	9	0.250261	0.0728268	0.0392538	0.315098	0.102144
GCTTAT	9	0.177411	0.0730699	0.0400562	0.317206	0.102776
GCTTCA	9	0.383775	0.0818343	0.0776529	0.397864	0.149188
GCTTCC	9	0.251924	0.0653668	0.0199523	0.253851	0.073035
GCTTCG	8	0.151073	0.0793292	0.0819895	0.373878	0.15353
GCTTCT	9	0.455	0.0869788	0.108375	0.44946	0.184958
GCTTGA	9	0.31175	0.039555	0.000592794	0.0929538	0.0244637
GCTTGC	9	0.253405	0.0714655	0.0349786	0.303429	0.0956027
GCTTGG	9	0.182196	0.0902402	0.13139	0.483798	0.209733
GCTTGT	8	0.18584	0.0610257	0.019431	0.221253	0.0722147
GCTTTA	9	0.298146	0.12877	0.5548	0.985137	0.648876
GCTTTC	9	0.266671	0.0930508	0.153435	0.514404	0.233929
GCTTTG	8	0.261262	0.0821212	0.0975407	0.400659	0.1734
GGAAAC	9	0.411846	0.147511	0.758102	1.29275	0.854691
GGAAAG	9	0.360815	0.0517308	0.00412193	0.158987	0.0389554
GGAAAT	9	0.349797	0.0718225	0.0360646	0.306468	0.0975411
GGAACA	9	0.413658	0.0735772	0.041769	0.321625	0.104701
GGAACC	9	0.300451	0.102473	0.241457	0.623855	0.329344
GGAACG	9	0.24338	0.0805635	0.0710902	0.385604	0.141583
GGAACT	9	0.36094	0.0620073	0.0141509	0.228428	0.0639416
GGAAGA	9	0.443682	0.0640164	0.017433	0.243471	0.0689671
GGAAGC	9	0.404967	0.0653269	0.0198741	0.253541	0.0729178
GGAAGG	9	0.201749	0.0669269	0.0232029	0.266113	0.0777924
GGAAGT	9	0.355594	0.078292	0.0603327	0.364166	0.129214
GGAATA	9	0.445762	0.102077	0.237356	0.619046	0.325297
GGAATC	9	0.311533	0.0605193	0.0120494	0.217596	0.0587568
GGAATG	9	0.321831	0.0550951	0.00638323	0.180339	0.0466773
GGAATT	9	0.234997	0.108258	0.304761	0.696282	0.393309
GGACAA	9	0.449551	0.0859538	0.101713	0.438929	0.178111
GGACAC	9	0.266526	0.132923	0.60433	1.04969	0.697253
GGACAG	9	0.22976	0.0695605	0.0295908	0.287468	0.0876899
GGACAT	9	0.382145	0.11626	0.400156	0.803013	0.491101
GGACCA	9	0.38741	0.136116	0.641018	1.10073	0.730774
GGACCT	9	0.29066	0.0899119	0.128949	0.480285	0.2072
GGACGA	9	0.436721	0.131759	0.590639	1.0314	0.684205
[truncated: 1,159 more rows]

## Sheet: Readme
This file examines shRNA correlations on the basis of the seed sequence of 6 nucleotides on nt 12-17 of the sense strand (see S1D Fig). It aggregates the value the leave-one-out shRNA correlations to the Consensus Seed Signature spearman for all shRNAs with a particular seed in each cell line. It then takes the average of those cell line means (up to 9) and the standard deviation. As with genes, …
Fields:
seed_seq_6mer - the 6 nt seed sequence on nt 12-17 of the sense strand
seedcnt - the count of cell lines with at least two shRNAs with the same 6-mer seed sequence. Up to 9. Note seeds with only 1 cell line were excluded because the sample standard deviation of one data point is undefined.
meancorr - the mean of the (up to 9) cell line means of the leave-one-out shRNA to CSS correlation.
stdcorr - the standard deviation of the (up to 9) cell line means. Small values indicate consistent effect.
p - the p-value from the f-test comparing the cell line means for the seed sequence to all cell line means for all seed sequences.
Fstat - the test statistic from the F-test.
q - the q-value using Benjamini-hochberg’s (or Storey’s) False Discovery Rate. Small values indicate significant results at a particular FDR, i.e. genes with consistent effects across cell lines.
