# Supplementary material for: Evaluation of RNAi and CRISPR technologies by large-scale gene expression profiling in the Connectivity Map
Source: PLoS Biol. 2017 Nov 30;15(11):e2003213. doi: 10.1371/journal.pbio.2003213 (PMC5726721; doi:10.1371/journal.pbio.2003213)
Supplement: S6 Data — For genes assayed by both technologies, holdout analysis results. CRISPR, clustered regularly interspaced short palindromic repeat; RNAi, RNA interference. (XLSX) [file pbio.2003213.s010.xlsx]

## Sheet: shRNAs-RNAi
pert_iname	cell_id	n_perts	groupvar	time_pt	holdout_median	null_median	holdout_std	null_std	empirical_pval	qval
ACLY	A375	3	ACLY	96 h	-1	-1	-1	-1	2	1
ACLY	A549	3	ACLY	96 h	-1	-1	-1	-1	2	1
ACLY	HA1E	3	ACLY	96 h	-1	-1	-1	-1	2	1
ACLY	HT29	3	ACLY	96 h	-1	-1	-1	-1	2	1
ACLY	MCF7	3	ACLY	96 h	-1	-1	-1	-1	2	1
ACLY	PC3	3	ACLY	96 h	-1	-1	-1	-1	2	1
AKT1	A375	8	AKT1	96 h	-0.0518103	0.0874849	0.0821269	0.0840749	0.978022	0.983396
AKT1	A549	8	AKT1	96 h	0.109758	0.117506	0.0315992	0.0797365	0.552448	0.691741
AKT1	HA1E	8	AKT1	96 h	0.179385	0.157371	0.041161	0.0571751	0.365634	0.508887
AKT1	HT29	8	AKT1	96 h	0.120461	0.12718	0.0743619	0.0804566	0.535465	0.680486
AKT1	MCF7	8	AKT1	96 h	0.232118	0.0879139	0.0792552	0.0725258	0.03996	0.134707
AKT1	PC3	8	AKT1	96 h	0.0949812	0.0917229	0.0597742	0.0622133	0.470529	0.606387
AKT2	A375	11	AKT2	96 h	0.213281	0.109439	0.102794	0.0899263	0.140859	0.271339
AKT2	A549	11	AKT2	96 h	0.328218	0.152308	0.112592	0.0786363	0.017982	0.0802612
AKT2	HA1E	11	AKT2	96 h	0.235695	0.191536	0.0841185	0.0550897	0.233766	0.39828
AKT2	HT29	11	AKT2	96 h	0.122555	0.158238	0.0918931	0.0785548	0.686314	0.77501
AKT2	MCF7	11	AKT2	96 h	0.342952	0.109553	0.0898362	0.0695668	0.002997	0.0249296
AKT2	PC3	11	AKT2	96 h	0.0866961	0.115197	0.0661035	0.0603248	0.69031	0.77501
AURKB	A375	7	AURKB	96 h	0.333989	0.0657072	0.105637	0.078527	0.003996	0.0317943
AURKB	A549	7	AURKB	96 h	0.00264633	0.0949405	0.0763791	0.0740956	0.926074	0.946768
AURKB	HA1E	7	AURKB	96 h	0.0731082	0.12485	0.0616089	0.0580139	0.817183	0.879673
AURKB	HT29	7	AURKB	96 h	0.147116	0.0932096	0.0641682	0.0746221	0.260739	0.414916
AURKB	MCF7	7	AURKB	96 h	0.145041	0.0705048	0.138971	0.0689891	0.150849	0.287556
AURKB	PC3	3	AURKB	96 h	-1	-1	-1	-1	2	1
AXL	A375	5	AXL	96 h	-1	-1	-1	-1	2	1
AXL	A549	3	AXL	96 h	-1	-1	-1	-1	2	1
AXL	HA1E	3	AXL	96 h	-1	-1	-1	-1	2	1
AXL	HT29	3	AXL	96 h	-1	-1	-1	-1	2	1
AXL	MCF7	3	AXL	96 h	-1	-1	-1	-1	2	1
AXL	PC3	5	AXL	96 h	-1	-1	-1	-1	2	1
BCL2L1	A375	4	BCL2L1	96 h	-1	-1	-1	-1	2	1
BCL2L1	A549	3	BCL2L1	96 h	-1	-1	-1	-1	2	1
BCL2L1	HA1E	3	BCL2L1	96 h	-1	-1	-1	-1	2	1
BCL2L1	HT29	3	BCL2L1	96 h	-1	-1	-1	-1	2	1
BCL2L1	MCF7	3	BCL2L1	96 h	-1	-1	-1	-1	2	1
BCL2L1	PC3	4	BCL2L1	96 h	-1	-1	-1	-1	2	1
BRAF	A375	14	BRAF	96 h	0.670818	0.136964	0.045475	0.0854141	0.000999001	0.0114261
BRAF	A549	14	BRAF	96 h	0.162729	0.186013	0.0732301	0.0787445	0.626374	0.730104
BRAF	HA1E	14	BRAF	96 h	0.310893	0.22944	0.114379	0.0541057	0.0649351	0.165043
BRAF	HT29	14	BRAF	96 h	0.714272	0.191784	0.0214389	0.0818309	0.000999001	0.0114261
BRAF	MCF7	14	BRAF	96 h	0.0748659	0.141101	0.0693458	0.0684935	0.851149	0.890059
BRAF	PC3	5	BRAF	96 h	-1	-1	-1	-1	2	1
CAMK1	A375	9	CAMK1	96 h	0.244304	0.0874849	0.0759648	0.0840749	0.0529471	0.153799
CAMK1	A549	9	CAMK1	96 h	0.229176	0.117506	0.0624232	0.0797365	0.107892	0.232285
CAMK1	HA1E	9	CAMK1	96 h	0.228598	0.157371	0.0917412	0.0571751	0.122877	0.255529
CAMK1	HT29	9	CAMK1	96 h	0.100295	0.12718	0.0870037	0.0804566	0.625375	0.730104
CAMK1	MCF7	9	CAMK1	96 h	0.0386601	0.0879139	0.15086	0.0725258	0.776224	0.850593
CAMK1	PC3	9	CAMK1	96 h	0.133959	0.0917229	0.0543064	0.0622133	0.22977	0.39828
CDH1	A375	3	CDH1	96 h	-1	-1	-1	-1	2	1
CDH1	A549	3	CDH1	96 h	-1	-1	-1	-1	2	1
CDH1	HA1E	3	CDH1	96 h	-1	-1	-1	-1	2	1
CDH1	HT29	3	CDH1	96 h	-1	-1	-1	-1	2	1
CDH1	MCF7	3	CDH1	96 h	-1	-1	-1	-1	2	1
CDH1	PC3	3	CDH1	96 h	-1	-1	-1	-1	2	1
CHMP2A	A375	10	CHMP2A	96 h	0.260588	0.109439	0.102769	0.0899263	0.0739261	0.175694
CHMP2A	A549	10	CHMP2A	96 h	0.340572	0.152308	0.0548817	0.0786363	0.016983	0.0802612
CHMP2A	HA1E	10	CHMP2A	96 h	0.499347	0.191536	0.0581569	0.0550897	0.000999001	0.0114261
CHMP2A	HT29	10	CHMP2A	96 h	0.565312	0.158238	0.0298201	0.0785548	0.000999001	0.0114261
CHMP2A	MCF7	10	CHMP2A	96 h	0.248137	0.109553	0.182942	0.0695668	0.041958	0.134707
CHMP2A	PC3	10	CHMP2A	96 h	0.274461	0.115197	0.0586365	0.0603248	0.011988	0.0626802
CRKL	A375	10	CRKL	96 h	0.233644	0.109439	0.0710298	0.0899263	0.104895	0.228521
CRKL	A549	10	CRKL	96 h	0.200781	0.152308	0.118955	0.0786363	0.267732	0.422371
CRKL	HA1E	10	CRKL	96 h	0.143899	0.191536	0.0421055	0.0550897	0.827173	0.880073
CRKL	HT29	10	CRKL	96 h	0.341817	0.158238	0.0540105	0.0785548	0.021978	0.0893773
CRKL	MCF7	10	CRKL	96 h	0.271686	0.109553	0.0566241	0.0695668	0.01998	0.0850312
CRKL	PC3	7	CRKL	96 h	0.0985584	0.069353	0.0318525	0.059711	0.311688	0.460699
CTSK	A375	3	CTSK	96 h	-1	-1	-1	-1	2	1
CTSK	A549	3	CTSK	96 h	-1	-1	-1	-1	2	1
CTSK	HA1E	3	CTSK	96 h	-1	-1	-1	-1	2	1
CTSK	HT29	3	CTSK	96 h	-1	-1	-1	-1	2	1
CTSK	MCF7	3	CTSK	96 h	-1	-1	-1	-1	2	1
CTSK	PC3	3	CTSK	96 h	-1	-1	-1	-1	2	1
CXCR4	A375	6	CXCR4	96 h	0.0983572	0.0657072	0.057992	0.078527	0.335664	0.487512
CXCR4	A549	6	CXCR4	96 h	0.00407295	0.0949405	0.03714	0.0740956	0.923077	0.946768
CXCR4	HA1E	6	CXCR4	96 h	0.111133	0.12485	0.034151	0.0580139	0.593407	0.713345
CXCR4	HT29	6	CXCR4	96 h	0.181294	0.0932096	0.0820806	0.0746221	0.132867	0.266277
CXCR4	MCF7	3	CXCR4	96 h	-1	-1	-1	-1	2	1
CXCR4	PC3	6	CXCR4	96 h	-0.0291002	0.069353	0.0343697	0.059711	0.978022	0.983396
DIDO1	A375	11	DIDO1	96 h	0.515553	0.109439	0.0762778	0.0899263	0.001998	0.0182817
DIDO1	A549	11	DIDO1	96 h	0.306698	0.152308	0.0607932	0.0786363	0.030969	0.111124
DIDO1	HA1E	11	DIDO1	96 h	0.266671	0.191536	0.0771374	0.0550897	0.0999001	0.222948
DIDO1	HT29	11	DIDO1	96 h	0.473611	0.158238	0.0390564	0.0785548	0.000999001	0.0114261
DIDO1	MCF7	11	DIDO1	96 h	0.256238	0.109553	0.0563812	0.0695668	0.02997	0.10969
DIDO1	PC3	11	DIDO1	96 h	0.224851	0.115197	0.103481	0.0603248	0.041958	0.134707
EGFR	A375	16	EGFR	96 h	0.123954	0.136964	0.128755	0.0854141	0.558442	0.691741
EGFR	A549	15	EGFR	96 h	0.228176	0.186013	0.0950953	0.0787445	0.306693	0.460699
EGFR	HA1E	15	EGFR	96 h	0.322216	0.22944	0.0516671	0.0541057	0.048951	0.149301
EGFR	HT29	15	EGFR	96 h	0.26992	0.191784	0.0490359	0.0818309	0.196803	0.34966
EGFR	MCF7	15	EGFR	96 h	0.184329	0.141101	0.0878147	0.0684935	0.23976	0.39828
EGFR	PC3	16	EGFR	96 h	0.229635	0.136745	0.0646648	0.0602078	0.0599401	0.163717
ERBB3	A375	21	ERBB3	96 h	0.214805	0.136964	0.132728	0.0854141	0.192807	0.347711
ERBB3	A549	21	ERBB3	96 h	0.117595	0.186013	0.103893	0.0787445	0.817183	0.879673
ERBB3	HA1E	21	ERBB3	96 h	0.222115	0.22944	0.0602955	0.0541057	0.559441	0.691741
ERBB3	HT29	21	ERBB3	96 h	0.190667	0.191784	0.0802008	0.0818309	0.505495	0.646892
ERBB3	MCF7	21	ERBB3	96 h	0.0999433	0.141101	0.0901882	0.0684935	0.728272	0.812645
ERBB3	PC3	14	ERBB3	96 h	0.197427	0.136745	0.059992	0.0602078	0.171828	0.320863
ERG	A375	7	ERG	96 h	0.248914	0.0657072	0.046189	0.078527	0.025974	0.099026
ERG	A549	5	ERG	96 h	-1	-1	-1	-1	2	1
ERG	HA1E	5	ERG	96 h	-1	-1	-1	-1	2	1
ERG	HT29	5	ERG	96 h	-1	-1	-1	-1	2	1
ERG	MCF7	5	ERG	96 h	-1	-1	-1	-1	2	1
ERG	PC3	10	ERG	96 h	0.134631	0.115197	0.135381	0.0603248	0.368631	0.508887
EXO1	A375	7	EXO1	96 h	0.422803	0.0657072	0.0785285	0.078527	0.001998	0.0182817
EXO1	A549	7	EXO1	96 h	0.223326	0.0949405	0.0827539	0.0740956	0.0609391	0.163998
EXO1	HA1E	7	EXO1	96 h	0.214811	0.12485	0.0627622	0.0580139	0.0629371	0.164535
EXO1	HT29	7	EXO1	96 h	0.037424	0.0932096	0.0974769	0.0746221	0.807193	0.879264
EXO1	MCF7	7	EXO1	96 h	0.151029	0.0705048	0.0372827	0.0689891	0.133866	0.266277
EXO1	PC3	7	EXO1	96 h	0.12562	0.069353	0.0459039	0.059711	0.182817	0.337935
FASN	A375	3	FASN	96 h	-1	-1	-1	-1	2	1
FASN	A549	3	FASN	96 h	-1	-1	-1	-1	2	1
FASN	HA1E	3	FASN	96 h	-1	-1	-1	-1	2	1
FASN	HT29	3	FASN	96 h	-1	-1	-1	-1	2	1
FASN	MCF7	3	FASN	96 h	-1	-1	-1	-1	2	1
FASN	PC3	3	FASN	96 h	-1	-1	-1	-1	2	1
FN1	A375	3	FN1	96 h	-1	-1	-1	-1	2	1
FN1	A549	3	FN1	96 h	-1	-1	-1	-1	2	1
FN1	HA1E	3	FN1	96 h	-1	-1	-1	-1	2	1
FN1	HT29	3	FN1	96 h	-1	-1	-1	-1	2	1
FN1	MCF7	3	FN1	96 h	-1	-1	-1	-1	2	1
FN1	PC3	3	FN1	96 h	-1	-1	-1	-1	2	1
HDAC1	A375	6	HDAC1	96 h	0.0517322	0.0657072	0.0661169	0.078527	0.581419	0.709331
HDAC1	A549	6	HDAC1	96 h	0.077221	0.0949405	0.0911194	0.0740956	0.592408	0.713345
HDAC1	HA1E	6	HDAC1	96 h	0.22299	0.12485	0.0323587	0.0580139	0.045954	0.142535
HDAC1	HT29	6	HDAC1	96 h	0.120915	0.0932096	0.0387115	0.0746221	0.350649	0.505266
HDAC1	MCF7	6	HDAC1	96 h	-0.010603	0.0705048	0.0567466	0.0689891	0.904096	0.940054
HDAC1	PC3	5	HDAC1	96 h	-1	-1	-1	-1	2	1
HDAC2	A375	5	HDAC2	96 h	-1	-1	-1	-1	2	1
HDAC2	A549	4	HDAC2	96 h	-1	-1	-1	-1	2	1
HDAC2	HA1E	4	HDAC2	96 h	-1	-1	-1	-1	2	1
HDAC2	HT29	3	HDAC2	96 h	-1	-1	-1	-1	2	1
HDAC2	MCF7	4	HDAC2	96 h	-1	-1	-1	-1	2	1
HDAC2	PC3	5	HDAC2	96 h	-1	-1	-1	-1	2	1
HDAC3	A375	3	HDAC3	96 h	-1	-1	-1	-1	2	1
HDAC3	A549	2	HDAC3	96 h	-1	-1	-1	-1	2	1
HDAC3	HA1E	2	HDAC3	96 h	-1	-1	-1	-1	2	1
HDAC3	HT29	3	HDAC3	96 h	-1	-1	-1	-1	2	1
HDAC3	MCF7	3	HDAC3	96 h	-1	-1	-1	-1	2	1
HDAC3	PC3	3	HDAC3	96 h	-1	-1	-1	-1	2	1
IGF2BP2	A375	9	IGF2BP2	96 h	0.32062	0.0874849	0.0556938	0.0840749	0.013986	0.0710956
IGF2BP2	A549	9	IGF2BP2	96 h	0.158038	0.117506	0.0681169	0.0797365	0.310689	0.460699
IGF2BP2	HA1E	9	IGF2BP2	96 h	0.236223	0.157371	0.0649815	0.0571751	0.101898	0.224667
IGF2BP2	MCF7	9	IGF2BP2	96 h	0.294714	0.0879139	0.0746968	0.0725258	0.010989	0.0609391
IGF2BP2	PC3	9	IGF2BP2	96 h	0.147319	0.0917229	0.0411747	0.0622133	0.168831	0.318517
JUN	A375	15	JUN	96 h	0.235988	0.136964	0.0616758	0.0854141	0.138861	0.270336
JUN	A549	15	JUN	96 h	0.247329	0.186013	0.0744883	0.0787445	0.240759	0.39828
JUN	HA1E	15	JUN	96 h	0.302236	0.22944	0.0650861	0.0541057	0.0879121	0.201099
JUN	HT29	15	JUN	96 h	0.223975	0.191784	0.0584995	0.0818309	0.363636	0.508887
JUN	MCF7	15	JUN	96 h	0.315276	0.141101	0.074555	0.0684935	0.017982	0.0802612
JUN	PC3	10	JUN	96 h	0.303719	0.115197	0.0968333	0.0603248	0.00799201	0.0522335
KEAP1	A375	3	KEAP1	96 h	-1	-1	-1	-1	2	1
KEAP1	A549	3	KEAP1	96 h	-1	-1	-1	-1	2	1
KEAP1	HA1E	3	KEAP1	96 h	-1	-1	-1	-1	2	1
KEAP1	HT29	3	KEAP1	96 h	-1	-1	-1	-1	2	1
KEAP1	MCF7	3	KEAP1	96 h	-1	-1	-1	-1	2	1
KEAP1	PC3	3	KEAP1	96 h	-1	-1	-1	-1	2	1
KIT	A375	7	KIT	96 h	0.210149	0.0657072	0.111651	0.078527	0.0549451	0.157109
KIT	A549	7	KIT	96 h	0.115789	0.0949405	0.0805126	0.0740956	0.37962	0.514008
KIT	HA1E	7	KIT	96 h	0.256195	0.12485	0.0873623	0.0580139	0.020979	0.0872537
KIT	HT29	7	KIT	96 h	-0.0154742	0.0932096	0.1198	0.0746221	0.962038	0.978072
KIT	MCF7	7	KIT	96 h	0.0897052	0.0705048	0.0607925	0.0689891	0.387612	0.514008
KIT	PC3	7	KIT	96 h	0.0541141	0.069353	0.0758069	0.059711	0.609391	0.719474
KRAS	A375	14	KRAS	96 h	0.283726	0.136964	0.0765107	0.0854141	0.0639361	0.164793
KRAS	A549	14	KRAS	96 h	0.443077	0.186013	0.0616444	0.0787445	0.00599401	0.040626
KRAS	HA1E	14	KRAS	96 h	0.264116	0.22944	0.0389677	0.0541057	0.253746	0.410934
KRAS	HT29	14	KRAS	96 h	0.29377	0.191784	0.0667577	0.0818309	0.135864	0.267346
KRAS	MCF7	14	KRAS	96 h	0.272226	0.141101	0.120475	0.0684935	0.041958	0.134707
KRAS	PC3	12	KRAS	96 h	0.115554	0.136745	0.0649163	0.0602078	0.631369	0.731269
KRT19	A375	3	KRT19	96 h	-1	-1	-1	-1	2	1
KRT19	A549	3	KRT19	96 h	-1	-1	-1	-1	2	1
KRT19	HA1E	3	KRT19	96 h	-1	-1	-1	-1	2	1
KRT19	HT29	3	KRT19	96 h	-1	-1	-1	-1	2	1
KRT19	MCF7	3	KRT19	96 h	-1	-1	-1	-1	2	1
KRT19	PC3	3	KRT19	96 h	-1	-1	-1	-1	2	1
MAPKAPK2	A375	3	MAPKAPK2	96 h	-1	-1	-1	-1	2	1
MAPKAPK2	A549	3	MAPKAPK2	96 h	-1	-1	-1	-1	2	1
MAPKAPK2	HA1E	3	MAPKAPK2	96 h	-1	-1	-1	-1	2	1
MAPKAPK2	HT29	3	MAPKAPK2	96 h	-1	-1	-1	-1	2	1
MAPKAPK2	MCF7	3	MAPKAPK2	96 h	-1	-1	-1	-1	2	1
MAPKAPK2	PC3	3	MAPKAPK2	96 h	-1	-1	-1	-1	2	1
MAST4	A375	10	MAST4	96 h	0.637047	0.109439	0.117356	0.0899263	0.000999001	0.0114261
MAST4	A549	10	MAST4	96 h	0.489154	0.152308	0.0853846	0.0786363	0.000999001	0.0114261
MAST4	HA1E	10	MAST4	96 h	0.590589	0.191536	0.0750808	0.0550897	0.000999001	0.0114261
MAST4	MCF7	10	MAST4	96 h	0.417648	0.109553	0.0532828	0.0695668	0.000999001	0.0114261
MAST4	PC3	10	MAST4	96 h	0.730659	0.115197	0.0406257	0.0603248	0.000999001	0.0114261
MTOR	A375	11	MTOR	96 h	0.0961359	0.109439	0.101037	0.0899263	0.566434	0.695687
MTOR	A549	11	MTOR	96 h	0.350368	0.152308	0.0674767	0.0786363	0.010989	0.0609391
MTOR	HA1E	11	MTOR	96 h	0.369962	0.191536	0.037596	0.0550897	0.002997	0.0249296
MTOR	HT29	11	MTOR	96 h	0.286179	0.158238	0.0756424	0.0785548	0.0689311	0.168192
MTOR	MCF7	11	MTOR	96 h	0.371062	0.109553	0.0490463	0.0695668	0.001998	0.0182817
MTOR	PC3	11	MTOR	96 h	0.411594	0.115197	0.04944	0.0603248	0.000999001	0.0114261
MTTP	A375	3	MTTP	96 h	-1	-1	-1	-1	2	1
MTTP	A549	3	MTTP	96 h	-1	-1	-1	-1	2	1
MTTP	HA1E	3	MTTP	96 h	-1	-1	-1	-1	2	1
MTTP	HT29	3	MTTP	96 h	-1	-1	-1	-1	2	1
MTTP	MCF7	3	MTTP	96 h	-1	-1	-1	-1	2	1
MTTP	PC3	3	MTTP	96 h	-1	-1	-1	-1	2	1
MYC	A375	14	MYC	96 h	0.238426	0.136964	0.137382	0.0854141	0.131868	0.266277
MYC	A549	14	MYC	96 h	0.24736	0.186013	0.0801446	0.0787445	0.23976	0.39828
MYC	HA1E	14	MYC	96 h	0.355786	0.22944	0.0525526	0.0541057	0.017982	0.0802612
MYC	HT29	14	MYC	96 h	0.547064	0.191784	0.0485903	0.0818309	0.000999001	0.0114261
MYC	MCF7	14	MYC	96 h	0.218789	0.141101	0.0441852	0.0684935	0.11988	0.252162
MYC	PC3	7	MYC	96 h	0.172426	0.069353	0.0527353	0.059711	0.0679321	0.167994
NF1	A375	3	NF1	96 h	-1	-1	-1	-1	2	1
NF1	A549	3	NF1	96 h	-1	-1	-1	-1	2	1
NF1	HA1E	3	NF1	96 h	-1	-1	-1	-1	2	1
NF1	HT29	3	NF1	96 h	-1	-1	-1	-1	2	1
NF1	MCF7	3	NF1	96 h	-1	-1	-1	-1	2	1
NF1	PC3	3	NF1	96 h	-1	-1	-1	-1	2	1
PFDN2	A375	15	PFDN2	96 h	0.437009	0.136964	0.0792296	0.0854141	0.001998	0.0182817
PFDN2	A549	15	PFDN2	96 h	0.225599	0.186013	0.07962	0.0787445	0.314685	0.460699
PFDN2	HA1E	15	PFDN2	96 h	0.318469	0.22944	0.0497995	0.0541057	0.0559441	0.157504
PFDN2	MCF7	15	PFDN2	96 h	0.266608	0.141101	0.123319	0.0684935	0.04995	0.14985
PFDN2	PC3	15	PFDN2	96 h	0.211066	0.136745	0.0664644	0.0602078	0.112887	0.240213
PIK3CA	A375	9	PIK3CA	96 h	0.115387	0.0874849	0.119732	0.0840749	0.363636	0.508887
PIK3CA	A549	7	PIK3CA	96 h	0.0253021	0.0949405	0.0588732	0.0740956	0.848152	0.890059
PIK3CA	HA1E	7	PIK3CA	96 h	0.0478369	0.12485	0.0749068	0.0580139	0.913087	0.944039
PIK3CA	HT29	7	PIK3CA	96 h	0.206755	0.0932096	0.0508493	0.0746221	0.0849151	0.196702
PIK3CA	MCF7	7	PIK3CA	96 h	0.0927411	0.0705048	0.065085	0.0689891	0.372627	0.508887
PIK3CA	PC3	9	PIK3CA	96 h	0.0370479	0.0917229	0.0525983	0.0622133	0.827173	0.880073
PLXNA1	A375	10	PLXNA1	96 h	0.222751	0.109439	0.0909743	0.0899263	0.127872	0.262928
PLXNA1	A549	10	PLXNA1	96 h	0.269241	0.152308	0.0518339	0.0786363	0.0729271	0.175601
PLXNA1	HA1E	10	PLXNA1	96 h	0.3506	0.191536	0.0814557	0.0550897	0.00599401	0.040626
PLXNA1	HT29	10	PLXNA1	96 h	0.197948	0.158238	0.0969706	0.0785548	0.285714	0.443099
PLXNA1	MCF7	10	PLXNA1	96 h	0.220271	0.109553	0.0784089	0.0695668	0.0809191	0.189849
PLXNA1	PC3	10	PLXNA1	96 h	0.248857	0.115197	0.0527251	0.0603248	0.024975	0.0972432
PPP2R2C	A375	6	PPP2R2C	96 h	0.256936	0.0657072	0.127929	0.078527	0.016983	0.0802612
PPP2R2C	A549	6	PPP2R2C	96 h	0.361748	0.0949405	0.0722391	0.0740956	0.004995	0.0365634
PPP2R2C	HA1E	6	PPP2R2C	96 h	0.16571	0.12485	0.0313285	0.0580139	0.241758	0.39828
PPP2R2C	HT29	6	PPP2R2C	96 h	0.237163	0.0932096	0.043454	0.0746221	0.044955	0.141841
PPP2R2C	MCF7	6	PPP2R2C	96 h	0.0906809	0.0705048	0.025276	0.0689891	0.385614	0.514008
PPP2R2C	PC3	6	PPP2R2C	96 h	0.191893	0.069353	0.0133565	0.059711	0.033966	0.117279
PTP4A1	A375	11	PTP4A1	96 h	0.189297	0.109439	0.0714101	0.0899263	0.193806	0.347711
PTP4A1	A549	11	PTP4A1	96 h	0.118733	0.152308	0.0923813	0.0786363	0.684316	0.77501
PTP4A1	HA1E	11	PTP4A1	96 h	0.286473	0.191536	0.048315	0.0550897	0.0519481	0.153331
PTP4A1	HT29	11	PTP4A1	96 h	0.36956	0.158238	0.0584744	0.0785548	0.011988	0.0626802
PTP4A1	MCF7	11	PTP4A1	96 h	0.295858	0.109553	0.0747221	0.0695668	0.00999001	0.0589733
PTP4A1	PC3	11	PTP4A1	96 h	0.243062	0.115197	0.041193	0.0603248	0.028971	0.108198
RPS6	A375	7	RPS6	96 h	0.0889906	0.0657072	0.122781	0.078527	0.385614	0.514008
RPS6	A549	7	RPS6	96 h	0.309772	0.0949405	0.0975326	0.0740956	0.00899101	0.0567364
RPS6	HA1E	7	RPS6	96 h	0.245466	0.12485	0.0689255	0.0580139	0.024975	0.0972432
RPS6	HT29	7	RPS6	96 h	0.572286	0.0932096	0.0406386	0.0746221	0.000999001	0.0114261
RPS6	MCF7	7	RPS6	96 h	0.443188	0.0705048	0.0700726	0.0689891	0.000999001	0.0114261
RPS6	PC3	7	RPS6	96 h	0.578129	0.069353	0.0745143	0.059711	0.000999001	0.0114261
SMAD2	A375	8	SMAD2	96 h	0.293422	0.0874849	0.0995173	0.0840749	0.01998	0.0850312
SMAD2	A549	8	SMAD2	96 h	0.143712	0.117506	0.0607743	0.0797365	0.371628	0.508887
SMAD2	HA1E	8	SMAD2	96 h	0.402778	0.157371	0.1424	0.0571751	0.000999001	0.0114261
SMAD2	HT29	8	SMAD2	96 h	0.245811	0.12718	0.123857	0.0804566	0.0929071	0.209901
SMAD2	MCF7	8	SMAD2	96 h	0.131368	0.0879139	0.0794966	0.0725258	0.288711	0.443985
SMAD2	PC3	8	SMAD2	96 h	0.104597	0.0917229	0.0777431	0.0622133	0.418581	0.551082
SMAD3	A375	6	SMAD3	96 h	0.0785942	0.0657072	0.0849348	0.078527	0.43956	0.574568
SMAD3	A549	4	SMAD3	96 h	-1	-1	-1	-1	2	1
SMAD3	HA1E	4	SMAD3	96 h	-1	-1	-1	-1	2	1
SMAD3	HT29	4	SMAD3	96 h	-1	-1	-1	-1	2	1
SMAD3	MCF7	4	SMAD3	96 h	-1	-1	-1	-1	2	1
SMAD3	PC3	6	SMAD3	96 h	0.1113	0.069353	0.145084	0.059711	0.243756	0.39828
SMAD4	A375	8	SMAD4	96 h	0.237251	0.0874849	0.0608149	0.0840749	0.0589411	0.163427
SMAD4	A549	8	SMAD4	96 h	0.188951	0.117506	0.069459	0.0797365	0.205794	0.362119
SMAD4	HA1E	8	SMAD4	96 h	0.132952	0.157371	0.0769621	0.0571751	0.676324	0.773545
SMAD4	HT29	8	SMAD4	96 h	0.171347	0.12718	0.0617033	0.0804566	0.296703	0.452473
SMAD4	MCF7	8	SMAD4	96 h	0.20556	0.0879139	0.0647448	0.0725258	0.0629371	0.164535
SMAD4	PC3	8	SMAD4	96 h	0.0966834	0.0917229	0.0548716	0.0622133	0.461538	0.599018
TGFBR1	A375	4	TGFBR1	96 h	-1	-1	-1	-1	2	1
TGFBR1	A549	3	TGFBR1	96 h	-1	-1	-1	-1	2	1
TGFBR1	HA1E	3	TGFBR1	96 h	-1	-1	-1	-1	2	1
TGFBR1	HT29	3	TGFBR1	96 h	-1	-1	-1	-1	2	1
TGFBR1	MCF7	3	TGFBR1	96 h	-1	-1	-1	-1	2	1
TGFBR1	PC3	4	TGFBR1	96 h	-1	-1	-1	-1	2	1
TGFBR2	A375	11	TGFBR2	96 h	0.440467	0.109439	0.182813	0.0899263	0.004995	0.0365634
TGFBR2	A549	11	TGFBR2	96 h	0.125269	0.152308	0.0990529	0.0786363	0.649351	0.747366
TGFBR2	HA1E	11	TGFBR2	96 h	0.331789	0.191536	0.144879	0.0550897	0.00999001	0.0589733
TGFBR2	HT29	11	TGFBR2	96 h	0.00190422	0.158238	0.188695	0.0785548	0.989011	1
TGFBR2	MCF7	11	TGFBR2	96 h	0.230265	0.109553	0.0847457	0.0695668	0.0669331	0.167791
TGFBR2	PC3	11	TGFBR2	96 h	0.0611431	0.115197	0.136898	0.0603248	0.849151	0.890059
TINF2	A375	6	TINF2	96 h	0.102416	0.0657072	0.0571362	0.078527	0.312687	0.460699
TINF2	A549	6	TINF2	96 h	0.0881501	0.0949405	0.0314595	0.0740956	0.544456	0.68714
TINF2	HA1E	6	TINF2	96 h	0.0831651	0.12485	0.0617971	0.0580139	0.769231	0.848007
TINF2	HT29	6	TINF2	96 h	0.118426	0.0932096	0.0658366	0.0746221	0.367632	0.508887
TINF2	MCF7	6	TINF2	96 h	0.132039	0.0705048	0.0422302	0.0689891	0.184815	0.338212
TINF2	PC3	6	TINF2	96 h	0.0546507	0.069353	0.0465615	0.059711	0.605395	0.719397
TLK2	A375	6	TLK2	96 h	0.0493369	0.0657072	0.0732887	0.078527	0.596404	0.713345
TLK2	A549	6	TLK2	96 h	0.137374	0.0949405	0.0961961	0.0740956	0.284715	0.443099
TLK2	HA1E	6	TLK2	96 h	0.168659	0.12485	0.0709633	0.0580139	0.232767	0.39828
TLK2	HT29	6	TLK2	96 h	0.149263	0.0932096	0.0360225	0.0746221	0.256743	0.41214
TLK2	MCF7	6	TLK2	96 h	0.0322334	0.0705048	0.0408544	0.0689891	0.744256	0.825447
TLK2	PC3	6	TLK2	96 h	0.195782	0.069353	0.0340764	0.059711	0.033966	0.117279
TP53	A375	5	TP53	96 h	-1	-1	-1	-1	2	1
TP53	A549	4	TP53	96 h	-1	-1	-1	-1	2	1
TP53	HA1E	4	TP53	96 h	-1	-1	-1	-1	2	1
TP53	HT29	4	TP53	96 h	-1	-1	-1	-1	2	1
TP53	MCF7	4	TP53	96 h	-1	-1	-1	-1	2	1
TP53	PC3	5	TP53	96 h	-1	-1	-1	-1	2	1
ZEB1	A375	3	ZEB1	96 h	-1	-1	-1	-1	2	1
ZEB1	A549	3	ZEB1	96 h	-1	-1	-1	-1	2	1
ZEB1	HA1E	3	ZEB1	96 h	-1	-1	-1	-1	2	1
ZEB1	HT29	3	ZEB1	96 h	-1	-1	-1	-1	2	1
ZEB1	MCF7	3	ZEB1	96 h	-1	-1	-1	-1	2	1
ZEB1	PC3	3	ZEB1	96 h	-1	-1	-1	-1	2	1

## Sheet: sgRNAs-CRISPR
pert_iname	cell_id	time_pt	xpr_cgs_holdout_med	xpr_nullcgs_med	xpr_shrnacgs_median	xpr_shrnacgs_median_rank	pval_cell	qval
ACLY	A375.311	96	0.532654	0.192078	0.261435	32	0.000999001	0.00924789
ACLY	A549.311	96	0.434942	0.166364	0.123315	1439	0.021978	0.0800098
ACLY	HA1E.311	96	0.424558	0.133005	0.117931	1401	0.018981	0.0698846
ACLY	HT29.311	96	0.435904	0.157388	0.312949	1	0.004995	0.02997
ACLY	MCF7.311	96	0.461187	0.174607	0.204966	85	0.003996	0.0253864
ACLY	PC3.311	96	0.25485	0.18323	0.113041	1116	0.137862	0.241887
AKT1	A375.311	96	0.265178	0.150176	0.203689	106	0.132867	0.237839
AKT1	A549.311	96	0.377018	0.19476	0.267873	43	0.04995	0.12947
AKT1	HA1E.311	96	0.256171	0.164826	0.19283	280	0.266733	0.372297
AKT1	HT29.311	96	0.267216	0.159517	0.189552	215	0.251748	0.359323
AKT1	MCF7.311	96	0.242258	0.174747	0.187168	106	0.163836	0.269456
AKT1	PC3.311	96	0.0842089	0.147524	0.0511017	2287.5	0.765235	0.799794
AKT2	A375.311	96	0.17061	0.13266	-0.156644	3592.5	0.43956	0.525526
AKT2	A549.311	96	0.119541	0.148416	0.178119	550	0.742258	0.780385
AKT2	HA1E.311	96	0.191653	0.159796	0.132041	1259	0.468531	0.548029
AKT2	HT29.311	96	0.370033	0.177776	0.174842	287	0.027972	0.0871435
AKT2	MCF7.311	96	0.226511	0.146274	0.121229	1427.5	0.210789	0.323676
AKT2	PC3.311	96	0.170296	0.145471	0.107074	1002	0.416583	0.509332
AURKB	A375.311	96	0.73323	0.0833089	0.490787	2	0.000999001	0.00924789
AURKB	A549.311	96	0.587025	0.167819	0.0797939	1766	0.000999001	0.00924789
AURKB	HA1E.311	96	0.512993	0.171302	0.0280072	2279	0.003996	0.0253864
AURKB	HT29.311	96	0.591423	0.160518	0.299052	61	0.000999001	0.00924789
AURKB	MCF7.311	96	0.478787	0.148908	0.307109	61.5	0.003996	0.0253864
AURKB	PC3.311	96	0.495587	0.137147	0.170888	888.5	0.000999001	0.00924789
AXL	A375.311	96	0.261382	0.155846	0.15652	513	0.138861	0.241887
AXL	A549.311	96	0.141857	0.174709	-0.104024	3558.5	0.654346	0.695109
AXL	HA1E.311	96	0.104816	0.124705	-0.0759062	2971	0.744256	0.780385
AXL	HT29.311	96	0.327932	0.182858	0.103968	1299.5	0.0769231	0.174287
AXL	MCF7.311	96	0.272945	0.202284	0.132111	636	0.102897	0.194963
AXL	PC3.311	96	0.195454	0.125726	0.171501	212.5	0.321678	0.419869
BCL2L1	A375.311	96	0.447214	0.145035	0.0979355	1013	0.003996	0.0253864
BCL2L1	A549.311	96	0.19229	0.151601	0.118742	1484.5	0.466533	0.548029
BCL2L1	HA1E.311	96	0.499166	0.132065	0.270282	48	0.003996	0.0253864
BCL2L1	HT29.311	96	0.401044	0.172032	0.0573631	2022	0.015984	0.0609272
BCL2L1	MCF7.311	96	0.231848	0.130566	0.0907469	1598.5	0.196803	0.311045
BCL2L1	PC3.311	96	0.136052	0.119307	0.0604479	1862	0.563437	0.623132
BRAF	A375.311	96	0.769505	0.115309	0.594419	1	0.000999001	0.00924789
BRAF	A549.311	96	0.305976	0.19994	0.143494	737	0.140859	0.244055
BRAF	HA1E.311	96	0.265559	0.169947	0.241004	18	0.238761	0.348462
BRAF	HT29.311	96	0.703818	0.160427	0.520956	1	0.000999001	0.00924789
BRAF	MCF7.311	96	0.315213	0.127824	0.0109456	2991	0.036963	0.106929
BRAF	PC3.311	96	0.236337	0.141369	0.0477988	2552.5	0.17982	0.292772
CAMK1	A375.311	96	0.254208	0.207483	-0.0546371	3310.5	0.157842	0.264978
CAMK1	A549.311	96	0.341251	0.199813	0.174015	959	0.0849151	0.182202
CAMK1	HA1E.311	96	0.300449	0.157987	-0.00691249	2553	0.15984	0.26558
CAMK1	HT29.311	96	0.251106	0.157324	0.0712777	1655	0.307692	0.405253
CAMK1	MCF7.311	96	0.0746945	0.145388	0.0677179	1699	0.878122	0.900353
CAMK1	PC3.311	96	0.0748843	0.123374	0.0256983	2724	0.792208	0.822678
CDH1	A375.311	96	0.1689	0.144697	-0.0464971	3082.5	0.443556	0.528353
CDH1	A549.311	96	0.245809	0.185202	0.0170147	2996	0.301698	0.39898
CDH1	HA1E.311	96	0.18783	0.166979	0.0976981	1299.5	0.483516	0.559497
CDH1	HT29.311	96	0.441381	0.194652	0.257537	33	0.003996	0.0253864
CDH1	MCF7.311	96	0.218839	0.127813	0.155831	278.5	0.242757	0.352576
CDH1	PC3.311	96	0.22374	0.201926	-0.0197667	4564	0.210789	0.323676
CHMP2A	A375.311	96	0.550024	0.196638	0.295655	9	0.000999001	0.00924789
CHMP2A	A549.311	96	0.178011	0.176339	0.175879	349	0.514486	0.578797
CHMP2A	HA1E.311	96	0.811841	0.118311	0.321988	20	0.000999001	0.00924789
CHMP2A	HT29.311	96	0.645181	0.157888	0.434746	1	0.000999001	0.00924789
CHMP2A	MCF7.311	96	0.33768	0.155786	0.255919	6	0.025974	0.0858732
CHMP2A	PC3.311	96	0.294425	0.207784	0.209131	151	0.0659341	0.157078
CIC	A375.311	96	0.304468	0.158994	-666	-666	0.0699301	0.163003
CIC	A549.311	96	0.151577	0.170364	-666	-666	0.622378	0.667717
CIC	HA1E.311	96	0.249602	0.178647	-666	-666	0.283716	0.385973
CIC	HT29.311	96	0.329096	0.186612	-666	-666	0.0739261	0.171086
CIC	MCF7.311	96	0.358561	0.187433	-666	-666	0.014985	0.059209
CIC	PC3.311	96	0.121003	0.141241	-666	-666	0.625375	0.668718
CRKL	A375.311	96	0.503647	0.143184	0.196903	594.5	0.001998	0.0157891
CRKL	A549.311	96	0.337715	0.213978	0.257525	92	0.0879121	0.184958
CRKL	HA1E.311	96	0.350035	0.190787	0.193057	468	0.0799201	0.17982
CRKL	HT29.311	96	0.657641	0.170798	0.351849	9	0.000999001	0.00924789
CRKL	MCF7.311	96	0.279449	0.154165	0.18895	174	0.0919081	0.184958
CRKL	PC3.311	96	0.455791	0.162036	0.099843	1464.5	0.000999001	0.00924789
CTSK	A375.311	96	0.414131	0.158012	-0.036501	3029	0.00899101	0.0434789
CTSK	A549.311	96	0.341647	0.228354	0.0887805	2056	0.0849151	0.182202
CTSK	HA1E.311	96	0.437838	0.149189	-0.0772886	3274.5	0.012987	0.0525974
CTSK	HT29.311	96	0.351265	0.189089	-666	-666	0.043956	0.120693
CTSK	MCF7.311	96	0.301803	0.16392	-0.11602	4801	0.048951	0.128944
CTSK	PC3.311	96	0.187645	0.139183	-0.0985287	4981	0.354645	0.443649
CXCR4	A375.311	96	0.193876	0.145299	-0.0293387	3098	0.353646	0.443649
CXCR4	A549.311	96	0.226829	0.166924	-0.0124034	3089	0.357642	0.443969
CXCR4	HA1E.311	96	0.196838	0.12975	-0.0943337	3171	0.448551	0.532346
CXCR4	HT29.311	96	0.225826	0.167446	0.0301604	2107	0.425574	0.5145
CXCR4	MCF7.311	96	0.138927	0.12652	0.0892273	2029	0.608392	0.65488
CXCR4	PC3.311	96	0.0628879	0.107342	-0.0238397	4018.5	0.824176	0.853141
DIDO1	A375.311	96	0.578103	0.147662	0.156543	938	0.000999001	0.00924789
DIDO1	A549.311	96	0.430716	0.158964	0.283175	7	0.023976	0.0835293
DIDO1	HA1E.311	96	0.465642	0.137166	0.205454	59	0.00699301	0.0359641
DIDO1	HT29.311	96	0.474927	0.173031	0.394861	1	0.000999001	0.00924789
DIDO1	MCF7.311	96	0.421787	0.121401	0.345271	1	0.00699301	0.0359641
DIDO1	PC3.311	96	0.305191	0.131522	0.276394	2	0.0519481	0.131494
EGFP	A375.311	96	0.324021	0.140065	-666	-666	0.048951	0.128944
EGFP	A549.311	96	0.265006	0.13654	-666	-666	0.24975	0.359323
EGFP	HA1E.311	96	0.33849	0.161016	-666	-666	0.0939061	0.187812
EGFP	HT29.311	96	0.212231	0.167146	-666	-666	0.491508	0.564711
EGFP	MCF7.311	96	0.290506	0.160122	-666	-666	0.0669331	0.158294
EGFP	PC3.311	96	0.15433	0.152529	-666	-666	0.476523	0.555372
EGFR	A375.311	96	0.261488	0.134416	0.195721	153	0.138861	0.241887
EGFR	A549.311	96	0.450023	0.194781	0.238327	206	0.016983	0.063247
EGFR	HA1E.311	96	0.259553	0.194333	0.226406	362.5	0.25974	0.367492
EGFR	HT29.311	96	0.243311	0.173286	0.229107	25	0.346653	0.438733
EGFR	MCF7.311	96	0.204847	0.14818	0.102348	1018	0.298701	0.398268
EGFR	PC3.311	96	0.130408	0.122456	0.0283828	2705	0.59041	0.639775
ERBB3	A375.311	96	0.274747	0.141517	0.185942	220.5	0.116883	0.213955
ERBB3	A549.311	96	0.278023	0.176813	0.267945	49	0.213786	0.325196
ERBB3	HA1E.311	96	0.255892	0.173909	0.140522	565	0.267732	0.372297
ERBB3	HT29.311	96	0.32429	0.193566	0.18168	167.5	0.0819181	0.180554
ERBB3	MCF7.311	96	0.11514	0.140385	0.155268	403	0.727273	0.767545
ERBB3	PC3.311	96	0.260269	0.141917	0.0833613	1477	0.121878	0.21938
ERG	A375.311	96	0.375195	0.175112	0.0584726	1739	0.016983	0.063247
ERG	A549.311	96	0.161932	0.128632	0.0894768	1399.5	0.583417	0.639775
ERG	HA1E.311	96	0.179966	0.157944	0.173749	523	0.5005	0.566152
ERG	HT29.311	96	0.312456	0.179697	0.0367275	2324	0.0979021	0.192244
ERG	MCF7.311	96	0.265708	0.162754	0.0511719	2236	0.10989	0.204623
ERG	PC3.311	96	0.153369	0.131002	0.0249312	3332	0.480519	0.558022
EXO1	A375.311	96	0.497144	0.144885	0.087414	1692	0.001998	0.0157891
EXO1	A549.311	96	0.40682	0.167813	0.114594	1101.5	0.030969	0.09466
EXO1	HA1E.311	96	0.275984	0.186448	0.04037	2220	0.217782	0.328192
EXO1	HT29.311	96	0.351009	0.187069	0.143138	342.5	0.043956	0.120693
EXO1	MCF7.311	96	0.289648	0.155239	0.0719305	1713.5	0.0699301	0.163003
EXO1	PC3.311	96	0.222828	0.150102	-0.00282766	3458	0.213786	0.325196
FASN	A375.311	96	0.457824	0.148846	0.0732919	1740	0.002997	0.0215784
FASN	A549.311	96	0.287652	0.161577	0.193527	470.5	0.185814	0.29657
FASN	HA1E.311	96	0.336126	0.134416	0.136109	339.5	0.0959041	0.190631
FASN	HT29.311	96	0.565844	0.186881	0.246751	110	0.000999001	0.00924789
FASN	MCF7.311	96	0.360487	0.156061	0.113766	1329	0.012987	0.0525974
FASN	PC3.311	96	0.386391	0.142447	0.0683847	1482	0.00799201	0.0398371
FN1	A375.311	96	0.278789	0.16421	0.115788	906	0.112887	0.209002
FN1	A549.311	96	0.248408	0.162516	0.0272403	2092	0.290709	0.389214
FN1	HA1E.311	96	0.246962	0.167751	0.129761	1045	0.290709	0.389214
FN1	HT29.311	96	0.352766	0.198928	0.0653242	1940.5	0.042957	0.120693
FN1	MCF7.311	96	0.250238	0.132542	0.103905	1048	0.142857	0.2462
FN1	PC3.311	96	0.13126	0.151116	0.00983037	3672.5	0.589411	0.639775
HDAC1	A375.311	96	0.197288	0.184529	0.206847	72	0.33966	0.434541
HDAC1	A549.311	96	0.32402	0.151039	0.027972	2098	0.106893	0.201357
HDAC1	HA1E.311	96	0.348807	0.176614	-0.00984886	2970.5	0.0829171	0.181521
HDAC1	HT29.311	96	0.210689	0.150652	-0.0211045	2590.5	0.5005	0.566152
HDAC1	MCF7.311	96	0.337449	0.175396	0.0347152	3098	0.025974	0.0858732
HDAC1	PC3.311	96	0.192956	0.136949	0.106685	1252.5	0.335664	0.433287
HDAC2	A375.311	96	0.354546	0.128487	0.0923881	1121	0.027972	0.0871435
HDAC2	A549.311	96	0.482946	0.176056	0.205143	208.5	0.00899101	0.0434789
HDAC2	HA1E.311	96	0.332695	0.146017	-0.00624606	2589	0.100899	0.194963
HDAC2	HT29.311	96	0.371387	0.169218	0.136498	441.5	0.027972	0.0871435
HDAC2	MCF7.311	96	0.360836	0.161275	0.115454	880	0.012987	0.0525974
HDAC2	PC3.311	96	0.276206	0.145904	0.124286	458	0.0899101	0.184958
HDAC3	A375.311	96	0.59291	0.156321	0.0755796	1592	0.000999001	0.00924789
HDAC3	A549.311	96	0.399985	0.18181	0.0916271	1508.5	0.035964	0.10593
HDAC3	HA1E.311	96	0.557715	0.160239	0.0669182	1791.5	0.001998	0.0157891
HDAC3	HT29.311	96	0.516435	0.187673	0.167734	357.5	0.000999001	0.00924789
HDAC3	MCF7.311	96	0.260408	0.131324	0.0957049	1284	0.121878	0.21938
HDAC3	PC3.311	96	0.544005	0.183884	0.151697	1028	0.000999001	0.00924789
IGF2BP2	A375.311	96	0.157806	0.160527	0.153684	512	0.490509	0.564711
IGF2BP2	A549.311	96	-0.0212234	0.119976	-0.0227832	2668	0.981019	0.987112
IGF2BP2	HA1E.311	96	0.343737	0.173267	0.0603812	1679	0.0879121	0.184958
IGF2BP2	HT29.311	96	0.155409	0.137898	-666	-666	0.792208	0.822678
IGF2BP2	MCF7.311	96	0.0902177	0.146647	-666	-666	0.829171	0.855578
IGF2BP2	PC3.311	96	0.0042168	0.134767	0.140752	576.5	0.955045	0.966983
INSM2	A375.311	96	0.362898	0.103086	-666	-666	0.023976	0.0835293
INSM2	A549.311	96	0.19107	0.148926	-666	-666	0.468531	0.548029
INSM2	HA1E.311	96	0.127289	0.169268	-666	-666	0.687313	0.727743
INSM2	HT29.311	96	0.290494	0.165824	-666	-666	0.154845	0.261301
INSM2	MCF7.311	96	0.223609	0.151917	-666	-666	0.225774	0.335554
INSM2	PC3.311	96	0.212977	0.142081	-666	-666	0.251748	0.359323
ITGA11	A375.311	96	0.403513	0.15599	-666	-666	0.011988	0.052488
ITGA11	A549.311	96	0.316124	0.151159	-666	-666	0.115884	0.213332
ITGA11	HA1E.311	96	0.380819	0.172075	-666	-666	0.0519481	0.131494
ITGA11	HT29.311	96	0.278298	0.177996	-666	-666	0.206793	0.32212
ITGA11	MCF7.311	96	0.287383	0.157115	-666	-666	0.0749251	0.172168
ITGA11	PC3.311	96	0.276087	0.147773	-666	-666	0.0909091	0.184958
JUN	A375.311	96	0.402072	0.13866	0.187034	201	0.011988	0.052488
JUN	A549.311	96	0.307089	0.190976	0.278683	31.5	0.137862	0.241887
JUN	HA1E.311	96	0.633294	0.158595	0.266651	61	0.000999001	0.00924789
JUN	HT29.311	96	0.243376	0.188468	0.163358	451	0.345654	0.438733
JUN	MCF7.311	96	0.142427	0.110995	0.0900727	1131	0.589411	0.639775
JUN	PC3.311	96	0.127905	0.128546	0.135185	595.5	0.597403	0.645195
KEAP1	A375.311	96	0.623357	0.134147	0.363322	2	0.000999001	0.00924789
KEAP1	A549.311	96	0.395981	0.213348	0.0648261	2427.5	0.037962	0.108847
KEAP1	HA1E.311	96	0.536481	0.196276	0.230464	220	0.002997	0.0215784
KEAP1	HT29.311	96	0.601931	0.138059	0.236075	58.5	0.000999001	0.00924789
KEAP1	MCF7.311	96	0.516406	0.1589	0.090928	1905	0.000999001	0.00924789
KEAP1	PC3.311	96	0.379053	0.142457	-0.0204041	3930	0.012987	0.0525974
KIT	A375.311	96	0.240644	0.15179	0.0315579	2120	0.194805	0.309396
KIT	A549.311	96	0.167346	0.193512	0.13175	1154	0.564436	0.623132
KIT	HA1E.311	96	0.408393	0.174869	0.0720575	1657.5	0.024975	0.0858732
KIT	HT29.311	96	0.33732	0.183326	0.17403	212	0.0629371	0.154482
KIT	MCF7.311	96	0.17565	0.126555	0.106223	1334.5	0.420579	0.512284
KIT	PC3.311	96	0.253404	0.185926	0.0699386	2059	0.144855	0.248323
KRAS	A375.311	96	0.261951	0.158403	0.205316	141	0.138861	0.241887
KRAS	A549.311	96	0.582126	0.172528	0.433021	2	0.000999001	0.00924789
KRAS	HA1E.311	96	0.330956	0.195912	0.171211	180.5	0.102897	0.194963
KRAS	HT29.311	96	0.318535	0.208561	0.200123	54	0.0889111	0.184958
KRAS	MCF7.311	96	0.220111	0.148954	0.103371	950	0.237762	0.348462
KRAS	PC3.311	96	0.215936	0.157344	0.122523	539	0.238761	0.348462
KRT19	A375.311	96	0.394966	0.143286	0.131261	990.5	0.012987	0.0525974
KRT19	A549.311	96	0.424604	0.180508	0.0265478	2429	0.026973	0.0871435
KRT19	HA1E.311	96	0.398971	0.152886	0.184833	346.5	0.032967	0.0998253
KRT19	HT29.311	96	0.351756	0.196494	0.0788292	1771.5	0.043956	0.120693
KRT19	MCF7.311	96	0.302967	0.135333	0.0120722	3226.5	0.047952	0.1284
KRT19	PC3.311	96	0.214612	0.171004	-0.019035	4043	0.243756	0.352576
MAPKAPK2	A375.311	96	0.409704	0.173444	0.0384932	2429	0.00999001	0.0475995
MAPKAPK2	A549.311	96	0.274467	0.158123	0.0785911	1814.5	0.222777	0.332626
MAPKAPK2	HA1E.311	96	0.463764	0.179618	0.113903	1600	0.00699301	0.0359641
MAPKAPK2	HT29.311	96	0.247817	0.176272	0.0977407	1142	0.322677	0.419869
MAPKAPK2	MCF7.311	96	0.270181	0.144101	-0.0832023	4804	0.102897	0.194963
MAPKAPK2	PC3.311	96	0.205918	0.13493	-0.00946403	3634	0.273726	0.375793
MAST4	A375.311	96	0.2178	0.142378	-0.0379176	3031	0.270729	0.37326
MAST4	A549.311	96	0.365901	0.155158	0.0185324	2162.5	0.0559441	0.13943
MAST4	HA1E.311	96	0.453557	0.150767	0.0186985	2576.5	0.00699301	0.0359641
MAST4	HT29.311	96	0.317326	0.169784	-666	-666	0.0909091	0.184958
MAST4	MCF7.311	96	0.190155	0.160618	-0.0231052	4084	0.356643	0.443969
MAST4	PC3.311	96	-0.00183061	0.117446	0.18377	169	0.962038	0.971029
MTOR	A375.311	96	0.587926	0.176996	0.212959	232	0.000999001	0.00924789
MTOR	A549.311	96	0.356563	0.156936	0.263671	1	0.0649351	0.155844
MTOR	HA1E.311	96	0.552015	0.13772	0.296339	1	0.001998	0.0157891
MTOR	HT29.311	96	0.411241	0.173959	0.370413	1	0.010989	0.0508634
MTOR	MCF7.311	96	0.417988	0.135757	0.206514	146	0.00699301	0.0359641
MTOR	PC3.311	96	0.497138	0.159841	0.196299	1312	0.000999001	0.00924789
MTTP	A375.311	96	0.121801	0.14334	0.0783481	1789	0.647353	0.689942
MTTP	A549.311	96	0.224433	0.185058	0.0839348	2010	0.366633	0.453393
MTTP	HA1E.311	96	0.159568	0.144908	0.0982759	1696	0.565435	0.623132
MTTP	HT29.311	96	0.264264	0.156612	0.0649622	1775.5	0.261738	0.368709
MTTP	MCF7.311	96	0.229152	0.174003	-0.0338764	4043	0.202797	0.318962
MTTP	PC3.311	96	0.219761	0.103521	0.0142796	2941	0.222777	0.332626
MYC	A375.311	96	0.0385064	0.119291	0.303943	164	0.895105	0.914871
MYC	A549.311	96	-0.0274787	0.125143	0.286347	3	0.987013	0.990069
MYC	HA1E.311	96	0.30055	0.14749	0.135134	328	0.15984	0.26558
MYC	HT29.311	96	0.0880136	0.149376	0.514377	1	0.954046	0.966983
MYC	MCF7.311	96	-0.0528647	0.11693	0.367516	3	0.998002	1
MYC	PC3.311	96	0.437634	0.141641	0.211496	306	0.000999001	0.00924789
NF1	A375.311	96	0.287143	0.212786	0.0494516	2467	0.0979021	0.192244
NF1	A549.311	96	0.245256	0.189975	0.140583	1210.5	0.301698	0.39898
NF1	HA1E.311	96	0.305287	0.11109	0.203285	301	0.154845	0.261301
NF1	HT29.311	96	0.245345	0.147813	0.0426778	1828.5	0.337662	0.434137
NF1	MCF7.311	96	0.336913	0.160252	0.170647	649	0.025974	0.0858732
NF1	PC3.311	96	0.335675	0.158249	0.0688539	1855	0.023976	0.0835293
PFDN2	A375.311	96	0.449548	0.170846	0.134258	883.5	0.002997	0.0215784
PFDN2	A549.311	96	0.203594	0.146423	0.249898	19.5	0.428571	0.516197
PFDN2	HA1E.311	96	0.261009	0.178548	0.167943	146	0.256743	0.364845
PFDN2	HT29.311	96	0.278543	0.193559	-666	-666	0.204795	0.320549
PFDN2	MCF7.311	96	0.227609	0.168444	-666	-666	0.207792	0.322127
PFDN2	PC3.311	96	0.280849	0.133837	0.211839	53	0.0819181	0.180554
PIK3CA	A375.311	96	0.31987	0.180358	-0.0837932	3479	0.0529471	0.132983
PIK3CA	A549.311	96	0.259909	0.164834	0.0350483	2123.5	0.266733	0.372297
PIK3CA	HA1E.311	96	0.254235	0.144864	-0.0169501	2879	0.270729	0.37326
PIK3CA	HT29.311	96	0.479661	0.196086	0.336917	7.5	0.000999001	0.00924789
PIK3CA	MCF7.311	96	0.332254	0.159292	0.161833	370.5	0.027972	0.0871435
PIK3CA	PC3.311	96	0.148758	0.152615	0.0477761	2265.5	0.498501	0.566152
PLXNA1	A375.311	96	0.398466	0.175586	-0.120322	3494.5	0.012987	0.0525974
PLXNA1	A549.311	96	0.227532	0.166587	0.0865892	1487.5	0.350649	0.442063
PLXNA1	HA1E.311	96	0.293012	0.194345	0.0584254	2147	0.176823	0.289347
PLXNA1	HT29.311	96	0.315639	0.173688	0.157877	249	0.0919081	0.184958
PLXNA1	MCF7.311	96	0.248305	0.160022	0.165483	228	0.146853	0.250423
PLXNA1	PC3.311	96	0.24493	0.174601	0.211466	80.5	0.161838	0.267528
PPP2R2C	A375.311	96	0.142928	0.139108	-0.155106	3608.5	0.561439	0.623132
PPP2R2C	A549.311	96	0.345012	0.179312	0.145745	882	0.0809191	0.180554
PPP2R2C	HA1E.311	96	0.462455	0.161899	0.036294	2335	0.00699301	0.0359641
PPP2R2C	HT29.311	96	0.26971	0.166831	0.00117608	2758	0.237762	0.348462
PPP2R2C	MCF7.311	96	0.179242	0.150353	0.0471027	2410	0.400599	0.491644
PPP2R2C	PC3.311	96	0.168786	0.126903	0.0042933	3465	0.424575	0.5145
PTP4A1	A375.311	96	0.34084	0.189974	0.151846	841	0.036963	0.106929
PTP4A1	A549.311	96	0.215344	0.141897	0.170372	632.5	0.393606	0.484899
PTP4A1	HA1E.311	96	0.227443	0.159277	0.20378	80	0.340659	0.434541
PTP4A1	HT29.311	96	0.379899	0.19256	0.200786	108.5	0.025974	0.0858732
PTP4A1	MCF7.311	96	0.0860574	0.14619	0.147425	558.5	0.845155	0.869302
PTP4A1	PC3.311	96	0.204582	0.164746	0.194988	117	0.278721	0.381036
RPS6	A375.311	96	0.692029	0.120759	0.329711	39.5	0.000999001	0.00924789
RPS6	A549.311	96	0.637211	0.135741	0.384283	6	0.000999001	0.00924789
RPS6	HA1E.311	96	0.7269	0.134255	0.404934	3	0.000999001	0.00924789
RPS6	HT29.311	96	0.725375	0.143334	0.56825	1	0.000999001	0.00924789
RPS6	MCF7.311	96	0.742177	0.119059	0.513111	2	0.000999001	0.00924789
RPS6	PC3.311	96	0.669571	0.161101	0.301889	82.5	0.000999001	0.00924789
SMAD2	A375.311	96	0.342004	0.14359	0.0373371	2337	0.034965	0.104895
SMAD2	A549.311	96	0.459877	0.177176	0.204652	330	0.014985	0.059209
SMAD2	HA1E.311	96	0.471921	0.167795	0.197411	309	0.00599401	0.0340712
SMAD2	HT29.311	96	0.393516	0.189387	0.0660972	1962	0.015984	0.0609272
SMAD2	MCF7.311	96	0.332064	0.159321	0.160331	390	0.027972	0.0871435
SMAD2	PC3.311	96	0.311321	0.15085	0.116056	683	0.046953	0.127838
SMAD3	A375.311	96	0.404377	0.195485	0.257661	80	0.011988	0.052488
SMAD3	A549.311	96	0.357833	0.141226	0.0319331	2132	0.0639361	0.154592
SMAD3	HA1E.311	96	0.474329	0.161442	-0.0376234	2886	0.00599401	0.0340712
SMAD3	HT29.311	96	0.345431	0.186069	0.0657409	2054	0.04995	0.12947
SMAD3	MCF7.311	96	0.197779	0.12409	0.0402223	2573.5	0.324675	0.420779
SMAD3	PC3.311	96	0.23513	0.135701	0.080451	1349.5	0.181818	0.294545
SMAD4	A375.311	96	0.166807	0.123321	0.103621	687	0.458541	0.542216
SMAD4	A549.311	96	0.45527	0.132225	0.226523	124	0.015984	0.0609272
SMAD4	HA1E.311	96	0.344095	0.168701	0.196155	246	0.0869131	0.184958
SMAD4	HT29.311	96	0.358559	0.201569	0.188504	72	0.03996	0.113571
SMAD4	MCF7.311	96	0.448443	0.138911	0.186712	405.5	0.004995	0.02997
SMAD4	PC3.311	96	0.220402	0.182053	0.163724	372	0.216783	0.328192
TGFBR1	A375.311	96	0.170672	0.1897	0.015423	2851	0.43956	0.525526
TGFBR1	A549.311	96	0.473961	0.15622	0.171796	456.5	0.010989	0.0508634
TGFBR1	HA1E.311	96	0.288841	0.182603	0.092214	1679.5	0.183816	0.294834
TGFBR1	HT29.311	96	0.210343	0.156012	0.0444165	2286.5	0.501499	0.566152
TGFBR1	MCF7.311	96	0.294347	0.151268	0.0414985	2501	0.0639361	0.154592
TGFBR1	PC3.311	96	0.202995	0.134563	-0.0511558	4729	0.284715	0.385973
TGFBR2	A375.311	96	0.155069	0.141223	0.0989314	951	0.4995	0.566152
TGFBR2	A549.311	96	0.400281	0.143545	0.249375	49.5	0.035964	0.10593
TGFBR2	HA1E.311	96	0.234457	0.163313	0.0805554	1853.5	0.317682	0.416716
TGFBR2	HT29.311	96	0.200994	0.165888	0.179675	155	0.561439	0.623132
TGFBR2	MCF7.311	96	0.272118	0.119257	0.106605	923.5	0.102897	0.194963
TGFBR2	PC3.311	96	0.021076	0.109256	0.0746842	1513.5	0.924076	0.941511
TINF2	A375.311	96	0.361021	0.153111	-0.0265447	2911.5	0.023976	0.0835293
TINF2	A549.311	96	0.349453	0.184864	0.000428796	2944	0.0759241	0.173235
TINF2	HA1E.311	96	0.345731	0.156107	0.068713	1788	0.0849151	0.182202
TINF2	HT29.311	96	0.406142	0.177353	0.0451783	2293.5	0.011988	0.052488
TINF2	MCF7.311	96	0.265636	0.146724	0.115896	941	0.10989	0.204623
TINF2	PC3.311	96	0.129967	0.132437	0.112325	698	0.59041	0.639775
TLK2	A375.311	96	0.479866	0.169721	0.0296473	2424	0.002997	0.0215784
TLK2	A549.311	96	0.328591	0.173012	0.0127369	2610	0.101898	0.194963
TLK2	HA1E.311	96	0.404336	0.186293	-0.00324138	2947	0.028971	0.0893962
TLK2	HT29.311	96	0.341481	0.158533	0.00923534	2778.5	0.0569431	0.140836
TLK2	MCF7.311	96	0.407651	0.168265	0.0842747	2532	0.00799201	0.0398371
TLK2	PC3.311	96	0.138434	0.146408	0.0203968	3206.5	0.555445	0.622713
TP53	A375.311	96	0.571358	0.121786	0.106114	1159	0.000999001	0.00924789
TP53	A549.311	96	0.535207	0.142441	0.232557	371	0.000999001	0.00924789
TP53	HA1E.311	96	0.380835	0.144895	0.109342	949.5	0.0519481	0.131494
TP53	HT29.311	96	0.304408	0.185154	0.0460061	1932	0.120879	0.21938
TP53	MCF7.311	96	0.446922	0.117017	0.0844759	1449.5	0.004995	0.02997
TP53	PC3.311	96	0.276275	0.124935	0.0709017	1639	0.0899101	0.184958
ZEB1	A375.311	96	0.425234	0.149599	0.101786	1436	0.00599401	0.0340712
ZEB1	A549.311	96	0.531221	0.173375	0.230788	341	0.001998	0.0157891
ZEB1	HA1E.311	96	0.562216	0.16294	0.147873	972	0.001998	0.0157891
ZEB1	HT29.311	96	0.345915	0.176216	0.0360062	2582	0.047952	0.1284
ZEB1	MCF7.311	96	0.207741	0.12711	0.10194	1906	0.288711	0.389214
ZEB1	PC3.311	96	0.23437	0.133905	0.203443	61	0.183816	0.294834

## Sheet: Rename
Please note that -1 values are provided when data were not available (not enough unique perturbations were profiled to enable holdout analysis).
