# Supplementary figures and images for: Evaluation of RNAi and CRISPR technologies by large-scale gene expression profiling in the Connectivity Map
Source: PLOS journal article supplement (doi:10.1371/journal.pbio.2003213), 2017-11-30

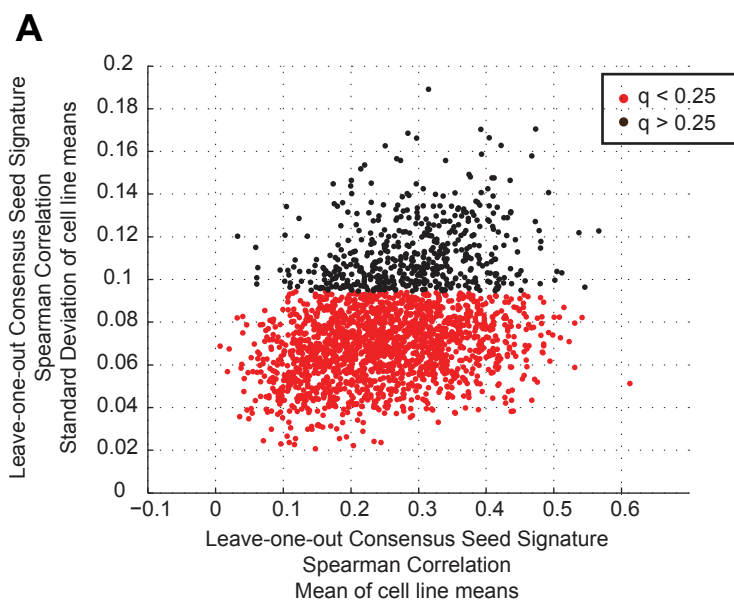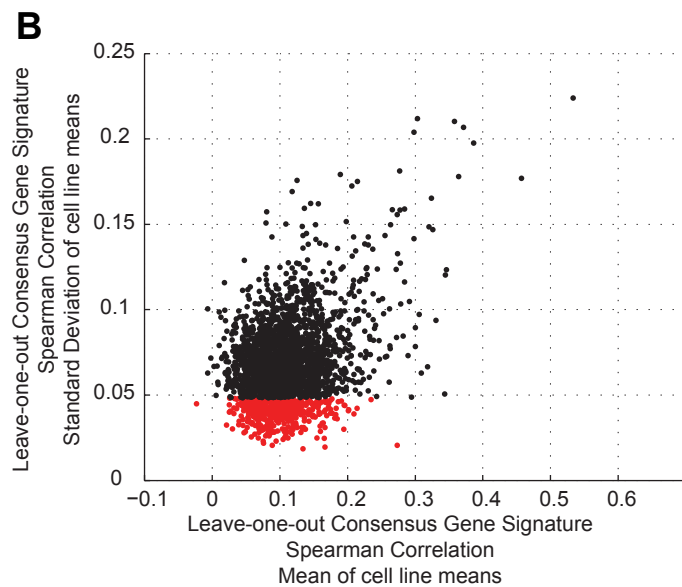

Supplement: S3 (10.1371/journal.pbio.2003213.s003) [file journal.pbio.2003213.s003]
